# Supplementary material for: Metabolome Analysis under Aluminum Toxicity between Aluminum-Tolerant and -Sensitive Rice (Oryza sativa L.)
Source: Plants (Basel). 2022 Jun 28;11(13):1717. doi: 10.3390/plants11131717 (PMC9269133; doi:10.3390/plants11131717)
Supplement: Supplementary file 1 [file plants-11-01717-s001.zip › Supplementary Tables_final.xlsx]

## Sheet: Table S1
Table S1. The list of 611 metabolites detected in this study.
									Peak aera			Peak aera			Peak aera			Peak aera			Peak aera
Index	Q1 (Da)	Q3 (Da)	Molecular Weight (Da)	Formula	Ionization model	Compounds	Class I	Class II	CK-1	CK-2	CK-3	H570-1	H570-2	H570-3	CK-1-1	CK-1-2	CK-1-3	H570-1-1	H570-1-2	H570-1-3	mix01	mix02	mix03	cpd_ID	kegg_map
pmb0782	86.1	69.2	85.089	C5H11N	[M+H]+	Piperidine	Alkaloids	Alkaloids	5983800	4771400	4289600	2738000	2158700	3039800	6253600	4724900	7518300	3513500	3618100	3062700	4596500	5292100	4544500	C01746	ko00960
pme2292	89.11	72.08	88.1	C4H12N2	[M+H]+	Putrescine	Alkaloids	Phenolamine	23496000	15951000	24365000	18851000	24616000	27321000	34328000	34115000	37487000	64674000	57727000	48225000	34630000	34960000	33349000	C00134	ko00330,ko00472,ko00480,ko00960,ko01100,ko01110,ko02010
pmb0484	104.1	60.1	103.091	C5H13NO	[M+H]+	Choline	Alkaloids	Alkaloids	7895600	7744400	7392000	7519500	6978800	7214400	7832000	7162900	8090800	8484700	8779200	8041200	8203400	7673700	8049400	C00114	ko00260,ko00564,ko01100,ko02010
pmb1096	118.07	91	117.058	C8H7N	[M+H]+	Indole	Alkaloids	Plumerane	409440	386920	498240	150770	160950	473140	1951300	1486000	1498600	1762100	1257200	1341500	1011400	1069200	1069800	C00463	ko00380,ko00400,ko00402,ko01100,ko01110
mws0191	118.09	59	117.079	C5H11NO2	[M+H]+	Betaine*	Alkaloids	Alkaloids	461020	335640	1793400	215650	276690	1232100	485660	507130	604630	1034600	587270	579000	598100	643670	660610	C00719	ko00260,ko01100,ko02010
pmp001287	120.08	103.05	119.073	C8H9N	[M+H]+	N-Benzylmethylene isomethylamine	Alkaloids	Alkaloids	10515000	6933300	7391500	4793000	3622700	4208400	9114100	7137900	9049800	5334800	5078200	4792800	7069500	6729300	6816200	--	--
pme2693	131.12	114.09	130.111	C6H14N2O	[M+H]+	N-Acetylputrescine	Alkaloids	Phenolamine	641060	300110	446270	608870	439460	415430	972990	832110	1114300	1494300	1385700	1131300	805160	774610	872650	C02714	ko00330,ko01100
pmb0501	131.13	114.1	130.122	C5H14N4	[M+H]+	Agmatine	Alkaloids	Phenolamine	630750	319870	419840	597660	457690	355300	933700	909450	1197600	1557400	1216700	1170100	837130	786830	821740	C00179	ko00330,ko01100
pma3649	132.1	86.1	131.058	C5H9NO3	[M+H]+	5-Aminolevulinate	Alkaloids	Alkaloids	22385000	17034000	18294000	9291400	9334700	9137100	24365000	18535000	22625000	15308000	13330000	11766000	16514000	18067000	14898000	C00430	ko00260,ko00860,ko01100,ko01110,ko02010
pmp001198	132.1	57.1	131.095	C6H13NO2	[M+H]+	6-Deoxyfagomine*	Alkaloids	Alkaloids	8399300	7490600	6600100	4326500	3253700	4428900	9573900	7412200	10709000	5832300	5570200	4670400	7315900	7243000	6720600	--	--
pmb0374	136.06	118.9	135.054	C5H5N5	[M+H]+	2-Aminopurine	Alkaloids	Alkaloids	1047100	850100	768530	574280	355300	307360	1299500	1102900	1309200	1175400	1139200	1108800	906790	985320	963920	--	--
Lmbp000659	136.08	91.05	135.068	C8H9NO	[M+H]+	2-Phenylacetamide	Alkaloids	Alkaloids	2869300	2274300	2115000	1652400	1342600	1426400	3526400	2843800	3376000	1754100	1813800	1648400	2557600	2562600	2474600	C02505	ko00360,ko01100
pme2268	138.06	94.07	137.048	C7H7NO2	[M+H]+	Trigonelline	Alkaloids	Alkaloids	311430	217810	201540	140020	146740	76553	403770	292940	575470	432450	279460	231600	285960	266790	291820	C01004	ko00760
pmp000966	144.1	84.1	143.095	C7H13NO2	[M+H]+	Stachydrine*	Alkaloids	Pyrrole alkaloids	2041900	1567900	1648900	2477100	2263800	1551800	1145100	1021800	1336800	1360200	1216400	1375800	1608400	1418800	1525800	C10172	--
mws0103	146.06	91	145.053	C9H7NO	[M+H]+	Indole-3-carboxaldehyde	Alkaloids	Plumerane	284920	292720	235480	209230	175790	147470	316500	313590	277800	264620	328030	282180	263000	255910	270380	C08493	--
pme1691	147.13	87.2	146.118	C7H16NO2	[M+H]+	Acetylcholine	Alkaloids	Alkaloids	58373	103450	107530	178670	199880	229540	142550	107870	131830	257600	219100	275690	173060	171500	181110	C08201	--
mws0005	161.11	144	160.1	C10H12N2	[M+H]+	Tryptamine	Alkaloids	Plumerane	1779600	1379600	3801200	728020	484160	1258400	6290500	4063200	9562600	3330900	1252500	1625000	2774000	2881800	2928600	C00398	ko00380,ko00901,ko01100,ko01110
mws1417	160.04	116	161.048	C9H7NO2	[M-H]-	Indole-3-carboxylic acid*	Alkaloids	Plumerane	1516100	1004700	1278500	935800	1041300	605690	1418400	1024600	1065200	1133000	766140	869810	1080700	1049600	1083900	--	--
mws0102	160.04	116	161.048	C9H7NO2	[M-H]-	Indole-5-carboxylic acid*	Alkaloids	Plumerane	1137500	716020	924640	647930	751360	443110	1041500	732830	770750	806150	564490	585190	798550	748310	779210	--	--
mws1346	162.08	98	161.069	C6H11NO4	[M+H]+	DL-2-Aminoadipic acid	Alkaloids	Alkaloids	510690	361810	522350	203220	272720	322560	656630	432960	532500	407790	338720	302920	434650	405310	434590	C00956	ko00300,ko00310,ko00311,ko01100,ko01110,ko01210,ko01230
mws1105	175.12	130	174.116	C11H14N2	[M+H]+	Gramine	Alkaloids	Alkaloids	91213	80969	91542	45470	71334	60579	108210	88928	89552	88008	88405	83507	74330	86389	96864	--	--
pme1651	176.1	130.1	175.063	C10H9NO2	[M+H]+	Indole 3-acetic acid (IAA)	Alkaloids	Plumerane	172020	74936	62557	22101	33683	40410	87815	67458	93293	53322	58508	43004	69408	63150	60424	C00954	ko00380,ko01100,ko04075
pmb0312	176.1	91.2	175.063	C10H9NO2	[M+H]+	5-Methoxyindole-3-carbaldehyde	Alkaloids	Plumerane	50041	38880	29665	53449	68491	48557	35565	31609	24660	53968	41931	42053	46011	40148	45785	--	--
pme2024	177.1	160	176.095	C10H12N2O	[M+H]+	Serotonin*	Alkaloids	Plumerane	36944000	61715000	124270000	26188000	38671000	69353000	106470000	74891000	101210000	75663000	40984000	59399000	79653000	72602000	71802000	C00780	ko00380,ko01100
XMP3552	178.05	150.05	177.043	C9H7NO3	[M+H]+	ABOA	Alkaloids	Alkaloids	43587	34030	78435	33590	30446	33578	69157	66373	53729	57702	29916	41020	60882	67650	68263	--	--
Hmmp001310	188.07	118.07	187.063	C11H9NO2	[M+H]+	3-Indoleacrylic acid	Alkaloids	Alkaloids	6163100	4295800	4155700	1780200	2089700	2174500	5491900	4689100	5006800	3038100	2862000	2391100	4132700	4135000	4040300	--	--
mws0597	190.05	146	191.058	C10H9NO3	[M-H]-	5-Hydroxyindole-3-acetic acid	Alkaloids	Plumerane	41528	18027	15430	20538	28786	22880	39868	16643	29895	34907	18715	32757	32413	36025	28319	C05635	ko00380,ko01100
Lmmp002080	193.13	105.03	192.126	C11H16N2O	[M+H]+	BenzoylPutrescine	Alkaloids	Phenolamine	1137000	1084000	807230	446650	500820	447000	874930	667010	890970	675990	617770	588240	803190	762800	828250	--	--
XMP3554	196.06	150.05	195.053	C9H9NO4	[M+H]+	HMBOA	Alkaloids	Alkaloids	41805	58247	33844	9	9	9	94109	96144	133040	53112	22603	18683	49296	45604	46316	--	--
pmb0130	203.12	144	202.111	C12H14N2O	[M+H]+	Acetryptine	Alkaloids	Phenolamine	13752	6785.1	122470	6759.1	6659.2	99011	28460	9545.2	10902	48851	15787	26271	31898	37466	35918	--	--
mws0018	203.22	83	202.216	C10H26N4	[M+H]+	Spermine	Alkaloids	Phenolamine	13093000	14427000	14177000	19064000	17575000	14933000	9582300	6876900	10273000	11522000	10078000	11144000	13453000	13166000	12955000	C00750	ko00330,ko00410,ko00480,ko01100
pmb0818	206.1	147.5	205.074	C11H11NO3	[M+H]+	Methoxyindoleacetic acid	Alkaloids	Plumerane	1162600	790260	781720	299270	358540	352230	1169500	1004300	1052800	582170	537790	405630	837320	792030	744090	C05660	ko00380
Hmcp001824	213.07	167.06	212.058	C12H8N2O2	[M+H]+	Ailanindole	Alkaloids	Alkaloids	271360	199980	190120	84239	75494	50907	219480	179390	175660	84941	93260	79993	140070	142670	126580	--	--
mws0677	219.11	160	218.106	C12H14N2O2	[M+H]+	N-Acetyl-5-hydroxytryptamine	Alkaloids	Alkaloids	427430	342710	459410	238050	241140	303120	445360	598660	729230	300710	253690	295400	389950	447560	409710	C00978	ko00380,ko01100
pmb0490	235.14	147.04	234.137	C13H18N2O2	[M+H]+	p-Coumaroylputrescine	Alkaloids	Phenolamine	591020	477430	636660	178270	243920	650570	3526500	2265100	3138100	3219000	2040900	2156900	1656400	1709100	1843300	C18326	ko00330,ko01100
mws1383	243.09	145	242.08	C12H10N4O2	[M+H]+	Lumichrome	Alkaloids	Alkaloids	66612	54204	49172	28497	19117	21413	51685	50223	47191	34937	35000	28342	45729	49050	43431	C01727	ko00740
pmb0323	251.14	163.04	250.132	C13H18N2O3	[M+H]+	N-Caffeoylputrescine	Alkaloids	Phenolamine	865490	539370	559080	257270	286770	225280	1671600	1309100	1978500	797980	639940	602070	800150	882400	846270	C03002	--
Lmhp002153	251.14	147.04	250.132	C13H18N2O3	[M+H]+	N-p-Coumaroylhydroxyputrescine	Alkaloids	Phenolamine	416180	284130	559700	166650	319630	547300	777200	767740	1059000	818470	917390	930150	613330	632550	622250	--	--
pmp000628	261.16	243.15	260.152	C15H20N2O2	[M+H]+	9α-Hydroxysophoramine	Alkaloids	Alkaloids	406100	294440	323560	456220	215860	212160	341500	364840	482540	391280	496630	408610	383970	367300	402720	--	--
Lmlp003161	265.15	177.06	264.147	C14H20N2O3	[M+H]+	Feruloylputrescine	Alkaloids	Phenolamine	7436500	5810500	6410700	2288700	2619800	3351600	19181000	13776000	19294000	6564700	6020300	5554100	8091800	9257800	8294600	C10497	ko00330,ko01100
Lmmp002013	267.17	179.07	266.163	C14H22N2O3	[M+H]+	Dihydroferuloylputrescine	Alkaloids	Phenolamine	8051000	6361400	7757100	2464000	2782800	3072000	20237000	15183000	21881000	6886300	5870600	5393400	8715100	9279800	9800000	--	--
pma2172	268.13	121	267.126	C17H17NO2	[M+H]+	Cinnamoyl tyramine	Alkaloids	Alkaloids	12855	21692	247650	6311.7	65989	251690	454480	107550	222000	458310	81478	289630	185440	185580	186930	--	--
pmp001245	280.15	221.08	280.138	C15H22NO4+	[M]+	Feruloylcholine	Alkaloids	Alkaloids	98541	129850	117580	234740	272610	183580	189100	239940	230780	960130	881410	664170	337720	450210	414210	--	--
Lmhp002501	281.15	177.05	280.142	C14H20N2O4	[M+H]+	N-Feruloylhydroxyputrescine	Alkaloids	Phenolamine	2475500	1858400	1845900	1585700	2179200	1275600	2736800	5437400	3776800	1015300	2052500	1514900	2165200	2303300	2361300	--	--
pmb0494	295.17	207.07	294.158	C15H22N2O4	[M+H]+	Sinapoylputrescine	Alkaloids	Phenolamine	548590	540080	529200	176770	159770	231610	1112200	928890	1376300	749560	775870	1188100	813740	724920	673510	--	--
pmb0496	307.18	177.05	306.169	C15H22N4O3	[M+H]+	N-Feruloylagmatine	Alkaloids	Phenolamine	4122900	4142100	7722200	1745900	2089200	3780100	12003000	8127700	12481000	5527000	4636100	4334200	5942200	6033000	7081600	C18325	ko00330,ko01100
pmp001214	310.16	251.09	310.147	C16H24NO5+	[M]+	Sinapine	Alkaloids	Alkaloids	36996	40474	37205	8955.2	9206.6	15928	96622	94854	89008	54632	58505	41871	47895	53700	60354	C00933	ko00940
mws1433	314.14	177.05	313.131	C18H19NO4	[M+H]+	Feruloyltyramine	Alkaloids	Phenolamine	1301000	1555200	1494100	1043700	1113600	734630	3111600	2068100	2349500	1857800	1373700	2629000	1768300	1767900	1745900	C02717	--
pmn001692	328.12	295.09	329.126	C18H19NO5	[M-H]-	3-O-Acetylhamayne*	Alkaloids	Alkaloids	185550	146620	117150	123890	83246	48830	185270	137530	147070	68246	65108	60654	113130	113620	96315	C12165	--
pmb0776	337.15	177.4	336.147	C20H20N2O3	[M+H]+	N-Feruloyl tryptamine	Alkaloids	Phenolamine	10422	14053	31253	8768.7	5810.4	20402	75737	43934	61261	66331	23195	51082	36174	35290	38109	--	--
Xmzp003314	340.19	223.12	339.195	C20H25N3O2	[M+H]+	Methylergonovine	Alkaloids	Alkaloids	14545	7072.6	14892	14511	14398	19721	7153.3	9885.3	14030	5480.2	8587.3	8842.5	15848	13482	17402	--	--
Hmmp002150	342.13	177.05	341.126	C19H19NO5	[M+H]+	3,5-Bis(3-methoxy-4-hydroxyphenyl)-2,3-dihydro-2(1H)-pyridinone	Alkaloids	Alkaloids	8570.8	22014	12390	42282	28206	28019	22158	15270	21121	66368	47477	55335	31971	33019	30565	--	--
pmb2211	343.3	240.7	342.288	C19H38N2O3	[M+H]+	Cocamidopropyl betaine	Alkaloids	Alkaloids	37253	9250.3	12748	21595	13020	10592	19909	11640	9246.7	10472	11808	11626	15162	14856	15192	--	--
XMN2362	342.08	180.04	343.09	C14H17NO9	[M-H]-	DIBOA-O-Hex	Alkaloids	Alkaloids	68236	46979	58563	68642	72442	49883	81608	82188	64946	84725	159510	126500	76183	78598	89629	--	--
pmf0557	327.04	171	350.034	C16H11N2NaO4S	[M-Na]-	Shikonin	Alkaloids	Alkaloids	777220	751890	694070	498750	362220	362350	1815400	1510600	2297800	1322600	1309900	1066000	1175700	1183900	1174600	C19371	--
pmb0770	353.15	177.1	352.142	C20H20N2O4	[M+H]+	N-Feruloyl serotonin	Alkaloids	Phenolamine	383330	349480	1157200	119680	188210	195580	597150	236390	431650	603220	170640	205890	397190	395870	390570	--	--
Rfmf05381	360.1	198	359.085	C14H17NO10	[M+H]+	TRIBOA-Glc	Alkaloids	Alkaloids	24376	22484	19118	14864	9456.6	9975	28419	38468	34407	35901	31738	27517	25389	33298	29961	--	--
pmb0064	374.11	198.08	373.101	C15H19NO10	[M+H]+	DIMBOA glucoside	Alkaloids	Alkaloids	11076000	11557000	11357000	24440000	28269000	24628000	10855000	10617000	10640000	23904000	31236000	30803000	20568000	20426000	20549000	C04831	ko00402
pmb0489	397.2	147.04	396.19	C19H28N2O7	[M+H]+	N-Glucosyl-p-coumaroyl putrescine	Alkaloids	Phenolamine	371170	326140	577740	152400	159850	409630	2691300	1901800	2619100	1928500	1108400	923520	1038700	1077900	1207100	--	--
pmb0500	411.19	177.05	410.184	C23H26N2O5	[M+H]+	N-p-Coumaroyl-N'-feruloylputrescine	Alkaloids	Phenolamine	4266	11540	7287.1	9	9	9	39810	14711	24127	32722	20015	30617	17267	18878	18308	--	--
Lmhp005784	425.21	177.05	424.2	C24H28N2O5	[M+H]+	p-Coumaroylferuloylcadaverine	Alkaloids	Phenolamine	5393.7	4342.9	6802.6	9	3212.9	2838.1	22362	14040	13011	14630	8317.2	12857	7921.1	7873.5	11780	--	--
pmp001248	428.19	369.11	428.168	C20H30NO9+	[M]+	Caffeoylcholine 5-glucoside	Alkaloids	Alkaloids	9595.5	10909	14010	6630.7	5398.8	10267	20714	20618	17387	7323.7	9088	7657.9	10077	13351	11571	--	--
Lmhp005550	441.2	177.05	440.195	C24H28N2O6	[M+H]+	N,N'-Diferuloylputrescine	Alkaloids	Phenolamine	21268	30752	30912	13430	12517	7089.5	65024	56734	60168	29946	26252	37453	35003	34434	31047	--	--
pmp001277	454.29	313.28	453.286	C21H44NO7P	[M+H]+	3-{(2-Aminoethoxy)(hydroxy)phosphoryl]oxy}-2-hydroxypropyl palmitate*	Alkaloids	Alkaloids	2715400	1265800	864970	2651000	1405900	764880	6030600	2068000	618130	11644000	11478000	6381400	5578000	5198000	4308900	--	--
Lmhp005872	455.22	177.05	454.21	C25H30N2O6	[M+H]+	Diferuloylcadaverine	Alkaloids	Phenolamine	17675	15489	19942	16386	13756	11307	33106	37113	40288	21926	11306	24478	25220	22047	24293	--	--
pmb1912	474.17	327	473.166	C20H23N7O7	[M+H]+	10-Formyltetrahydrofuran	Alkaloids	Alkaloids	6006500	6198200	5141500	2608500	3105100	2334400	4329200	4348600	3666700	2086400	2813800	2717400	4329000	3960300	3883500	C00234	ko00670,ko00970,ko01100,ko01200
pmn001727	474.18	312.12	475.184	C24H29NO9	[M-H]-	N-(4-O-(Glucosyl)-E-feruloyl)-tyramine	Alkaloids	Phenolamine	53518	40135	66004	35931	21526	26672	90327	55698	114840	83845	46567	52329	56111	50577	45482	--	--
pmb0769	485.1	323.1	484.185	C25H28N2O8	[M+H]+	Nb-Trans-p-Coumaroylserotonin Glucoside	Alkaloids	Alkaloids	46904	47815	30239	33225	34225	13786	61423	31832	44657	44903	38384	76347	45237	40964	41009	--	--
Rfmf07573	506.2	182.1	505.143	C20H27NO14	[M+H]+	DIBOA-Glc-Glc	Alkaloids	Alkaloids	52730	44332	42398	57304	43869	51247	60444	52665	67779	194450	84907	105610	58947	58396	43159	--	--
pmp001279	518.32	459.25	517.313	C21H48N3O9P	[M+H]+	Bis(N,N-diethylethanaminium)-2-acetamido-1,5-anhydro-2-deoxy-1-[-hydroxy(phosphonato)methyl]-D-glucitol	Alkaloids	Alkaloids	548460	141600	53590	383420	154850	89800	186680	100060	122540	563070	503970	578100	479800	354410	351760	--	--
Xmzp009846	576.36	184.07	575.311	C32H41N5O5	[M+H]+	A-ergocryptine	Alkaloids	Alkaloids	13604	19313	9164.8	31963	73612	49156	2852.1	2233.4	5346.8	9633	18151	20298	18225	19362	15263	--	--
pmb0492	584.28	325	583.268	C34H37N3O6	[M+H]+	N',N'',N'''-p-Coumaroyl-cinnamoyl-caffeoyl spermidine	Alkaloids	Phenolamine	424630	332980	412690	454640	329450	267060	892340	834050	780860	649540	599780	535110	580640	547410	522120	--	--
Cmxp002841	595.28	403.18	594.273	C36H38O6N2	[M+H]+	Chitraline	Alkaloids	Alkaloids	271110	239390	200820	295450	278200	180550	263840	238800	220780	314450	348390	326790	243200	312930	278170	--	--
pmp001253	625.25	488.17	624.247	C36H36N2O8	[M+H]+	Cannabisin F*	Alkaloids	Phenolamine	311020	248270	208400	203860	188570	137350	206880	160610	146880	93323	119140	118080	183610	186320	181610	C17910	--
pmp001275	672.42	331.29	671.409	C31H61O14N	[M+H]+	3-Hydroxypropyl palmitate glc-glucosamine	Alkaloids	Alkaloids	3460100	2079600	1178900	2371200	1010900	822620	1552000	1175100	1105000	1989300	1073200	1139600	2392400	1917500	1444400	--	--
pmp001189	685.28	548.2	684.268	C38H40N2O10	[M+H]+	(5-8)-Hydroxy-1-(hydroxyldimethoxyphenyl)-N2,N3-bis(4-hydroxyphenethyl)-(5-8)-dimethoxy-1,2-dihydronaphthalene-2,3-dicarboxamide	Alkaloids	Alkaloids	44443	48933	40928	10291	15783	9727.8	28674	25270	19770	11357	16123	13460	23544	24746	21592	--	--
pme3017	104.07	58	103.063	C4H9NO2	[M+H]+	2-Aminoisobutyric acid*	Amino acids and derivatives	Amino acids and derivatives	5038900	4699500	4744200	4129200	3832500	3671500	5227000	4899000	4790500	5021600	4808000	4346900	4928200	4262300	4332900	C03665	--
pme0010	106	60	105.043	C3H7NO3	[M+H]+	L-Serine	Amino acids and derivatives	Amino acids and derivatives	1515300	1161600	1623000	983260	777720	934080	2152800	1614300	1672800	2024300	1600100	1449600	1642900	1277300	1189000	C00065	ko00260,ko00261,ko00270,ko00460,ko00600,ko00630,ko00920,ko00970,ko01100,ko01110,ko01200,ko01230,ko01502,ko02010
pme2122	112.09	95	111.08	C5H9N3	[M+H]+	Histamine	Amino acids and derivatives	Amino acids and derivatives	1582200	911780	1085600	962450	500550	582950	1220200	1222600	2050200	1285400	1534800	1406200	1164300	1151800	1313000	C00388	ko00340,ko01100,ko01110
pme0006	116.07	70.1	115.063	C5H9NO2	[M+H]+	L-Proline	Amino acids and derivatives	Amino acids and derivatives	18351000	14272000	18991000	11614000	8151800	10338000	31033000	28498000	39031000	25697000	22305000	20892000	21548000	20405000	22920000	C00148	ko00330,ko00332,ko00970,ko01100,ko01110,ko01230,ko02010
pme3193	116.04	74	117.043	C4H7NO3	[M-H]-	N-Acetylglycine	Amino acids and derivatives	Amino acids and derivatives	20106	11900	17577	7222.6	5601.4	11452	27602	24821	18269	21650	18376	17965	20185	16493	15998	--	--
mws0256	118.09	72.1	117.079	C5H11NO2	[M+H]+	L-Valine*	Amino acids and derivatives	Amino acids and derivatives	4426300	3290000	3418000	1901600	1553100	1890500	4772200	4039800	5434000	3435900	2797100	2396200	3292500	3271900	3475000	C00183	ko00280,ko00290,ko00311,ko00460,ko00770,ko00966,ko00970,ko01100,ko01110,ko01210,ko01230,ko02010
pme0195	120.02	62	121.02	C3H7NO2S	[M-H]-	L-Cysteine	Amino acids and derivatives	Amino acids and derivatives	4219800	4072000	3093000	1709400	1631000	1297400	2811700	1956100	1460500	115090	200150	167530	1940300	2028600	2134400	C00097	ko00260,ko00270,ko00311,ko00332,ko00430,ko00460,ko00480,ko00730,ko00770,ko00920,ko00970,ko01100,ko01110,ko01200,ko01230,ko04122
Rfmb319	130.09	84.08	129.079	C6H11NO2	[M+H]+	Pipecolic acid	Amino acids and derivatives	Amino acids and derivatives	9840800	5974200	8271700	265100	567330	828770	16971000	15184000	22103000	7743700	3941500	4139600	8158300	9022200	8554800	C00408	ko00310,ko00960,ko01100,ko01110
mws0258	132.1	86	131.095	C6H13NO2	[M+H]+	L-Isoleucine*	Amino acids and derivatives	Amino acids and derivatives	1807800	1526200	1356600	1010500	663610	926960	2087200	1521300	2279600	1281700	1268800	948190	1520300	1422800	1549400	C00407	ko00280,ko00290,ko00460,ko00960,ko00966,ko00970,ko01100,ko01110,ko01210,ko01230,ko02010
mws0001	133.06	74	132.054	C4H8N2O3	[M+H]+	L-Asparagine	Amino acids and derivatives	Amino acids and derivatives	2297600	917730	1182900	1043800	693700	930050	1524300	1201600	1465200	3175400	1757100	1385800	1497300	1227900	1377400	C00152	ko00250,ko00460,ko00970,ko01100,ko01110,ko01230
pme2527	133	116	132.09	C5H12N2O2	[M+H]+	L-Ornithine	Amino acids and derivatives	Amino acids and derivatives	126490	54285	80637	65081	49272	56319	94712	73284	102360	184710	122300	102860	95912	83912	72465	C00077	ko00220,ko00330,ko00472,ko00480,ko01100,ko01110,ko01210,ko01230,ko02010
mws0219	132.03	88	133.038	C4H7NO4	[M-H]-	L-Aspartic Acid	Amino acids and derivatives	Amino acids and derivatives	2405300	2437100	2493200	2020500	1978200	1995500	3761400	3451900	3722300	2279100	2525900	2306400	2785500	2660700	2673200	C00049	ko00220,ko00250,ko00260,ko00261,ko00270,ko00300,ko00340,ko00410,ko00460,ko00710,ko00760,ko00770,ko00970,ko01100,ko01110,ko01200,ko01210,ko01230,ko02010
pme0057	136.04	118.1	135.035	C4H9NO2S	[M+H]+	L-Homocysteine	Amino acids and derivatives	Amino acids and derivatives	24804	18515	15802	53237	51756	33573	23028	26634	33444	36852	45350	57168	30568	30890	37451	C00155	ko00270,ko00920,ko01100,ko01110,ko01230
pme1002	138.09	103	137.084	C8H11NO	[M+H]+	L-Tyramine*	Amino acids and derivatives	Amino acids and derivatives	3867300	4200500	4890300	9377900	7699300	5947700	7939300	5697900	8047300	11320000	10758000	11959000	7695300	8367600	7970800	C00483	ko00350,ko00950,ko01100,ko01110
Rfmb320	144.1	84.08	143.095	C7H13NO2	[M+H]+	1,2-N-Methylpipecolic acid*	Amino acids and derivatives	Amino acids and derivatives	9	9	2255800	9	9	1763700	9	9	127390	9	9	99394	395750	369820	380080	--	--
Rfmb318	144.1	84.08	144.092	C7H14NO2+	[M]+	D-Proline betaine	Amino acids and derivatives	Amino acids and derivatives	9	9	970270	9	9	779720	9	9	51754	25579	29794	35513	182590	175680	192210	C21514	--
pme0193	147.08	84	146.069	C5H10N2O3	[M+H]+	L-Glutamine	Amino acids and derivatives	Amino acids and derivatives	21040000	14373000	17825000	13076000	9564900	11614000	17371000	15550000	18839000	15726000	14638000	14684000	15890000	15600000	16057000	C00064	ko00220,ko00230,ko00240,ko00250,ko00630,ko00910,ko00970,ko01100,ko01230,ko02010
pme0026	147.11	84	146.106	C6H14N2O2	[M+H]+	L-Lysine	Amino acids and derivatives	Amino acids and derivatives	20669000	14504000	16074000	12380000	9526700	11420000	17210000	15782000	18818000	15501000	15626000	14529000	15702000	15567000	15907000	C00047	ko00300,ko00310,ko00780,ko00960,ko00970,ko01100,ko01110,ko01210,ko01230,ko02010
pme0014	148.06	84	147.053	C5H9NO4	[M+H]+	L-Glutamic acid*	Amino acids and derivatives	Amino acids and derivatives	15259000	15708000	17433000	23131000	14488000	16567000	27675000	25481000	27830000	26782000	28002000	28236000	22094000	18569000	21289000	C00025	ko00220,ko00250,ko00330,ko00332,ko00340,ko00430,ko00480,ko00630,ko00650,ko00660,ko00860,ko00910,ko00970,ko01100,ko01110,ko01200,ko01210,ko01230,ko02010
mws1050	148.06	88	147.053	C5H9NO4	[M+H]+	O-Acetylserine*	Amino acids and derivatives	Amino acids and derivatives	175920	207370	309900	212880	198580	253580	308630	295400	413400	361920	348240	416690	271010	257960	299000	C00979	ko00270,ko00908,ko00920,ko01100,ko01110,ko01200,ko01230,ko04122
pme1210	150.06	61	149.051	C5H11NO2S	[M+H]+	L-Methionine	Amino acids and derivatives	Amino acids and derivatives	2355700	1949100	2650100	837270	377410	710230	2796200	2929600	4727000	2131100	1785100	1460400	2420400	2499700	2356200	C00073	ko00270,ko00966,ko00970,ko01100,ko01110,ko01210,ko01230
mws0254	156.08	110	155.069	C6H9N3O2	[M+H]+	L-Histidine	Amino acids and derivatives	Amino acids and derivatives	4186100	1958700	3151400	1061300	1028200	1414300	4621100	3701600	4803100	4885200	2959600	2505000	3484200	2926700	2776800	C00135	ko00340,ko00410,ko00970,ko01100,ko01110,ko01230,ko02010
pme3382	160.06	98	161.069	C6H11NO4	[M-H]-	N-Acetylthreonine	Amino acids and derivatives	Amino acids and derivatives	115560	84314	88780	111780	82053	82906	111150	109970	103840	145270	115940	114650	111530	99767	105990	--	--
pme2914	161.05	99	162.053	C6H10O5	[M-H]-	3-Hydroxy-3-methylpentane-1,5-dioic acid	Amino acids and derivatives	Amino acids and derivatives	1585400	720160	984230	1585800	959970	1628800	2017900	1916200	1782400	3109200	3668100	3502600	2133100	2095600	2154500	C03761	--
Lmbp000123	164.07	56.05	163.067	C6H13NO2S	[M+H]+	L-Homomethionine	Amino acids and derivatives	Amino acids and derivatives	7264200	3329800	2942300	1321600	2602800	2215000	2533900	2628000	2923600	3826700	2239300	2103100	2744800	3184100	3394000	C17213	ko00966,ko01110,ko01210
pme1419	164.07	104	163.067	C6H13NO2S	[M+H]+	Methionine methyl ester	Amino acids and derivatives	Amino acids and derivatives	96095	77938	142280	43613	83234	87727	138950	173340	238060	112350	61650	75353	116700	112910	123710	--	--
pme2617	166.05	102	165.046	C5H11NO3S	[M+H]+	Methionine sulfoxide	Amino acids and derivatives	Amino acids and derivatives	5687400	6360700	6156500	7624700	7311700	6193800	3639300	3726500	4303800	5107100	4458500	4666800	5632800	5498400	5529600	--	--
pme0021	166.09	120.08	165.07	C9H11NO2	[M+H]+	L-Phenylalanine	Amino acids and derivatives	Amino acids and derivatives	16383000	10409000	12165000	7483400	5773800	6547300	13442000	11373000	14498000	7269400	7526900	7058600	10838000	10824000	11244000	C00079	ko00360,ko00400,ko00460,ko00940,ko00960,ko00966,ko00970,ko00998,ko01100,ko01110,ko01210,ko01230,ko02010
pme0253	174.11	86	173.105	C8H15NO3	[M+H]+	N-Acetyl-L-leucine	Amino acids and derivatives	Amino acids and derivatives	55276	66256	48735	32297	34449	40350	81850	75845	75216	78192	66134	115890	67139	70553	53242	C02710	--
mws0260	175.12	116	174.112	C6H14N4O2	[M+H]+	L-Arginine	Amino acids and derivatives	Amino acids and derivatives	2457100	1150100	1867500	1360800	937020	1478400	1241100	1136900	2226800	1765900	1621500	1606900	1527200	1383900	1804900	C00062	ko00220,ko00261,ko00330,ko00472,ko00970,ko01100,ko01110,ko01230,ko02010
pme2559	174.04	88	175.048	C6H9NO5	[M-H]-	N-Acetylaspartate	Amino acids and derivatives	Amino acids and derivatives	884610	387820	515390	133260	192580	179890	525200	544860	666920	312010	296660	276160	470350	473150	426160	C01042	ko00250,ko01100
pmb0468	178	161	177.046	C6H11NO3S	[M+H]+	N-Formylmethionine	Amino acids and derivatives	Amino acids and derivatives	1119300	2015900	5496500	828400	1173800	2488000	4666400	2566400	4118300	2446000	1302800	2388100	2712400	2744900	2322700	C03145	ko00270
mws0250	182.08	136.1	181.074	C9H11NO3	[M+H]+	L-Tyrosine	Amino acids and derivatives	Amino acids and derivatives	1518700	1230600	1123300	916780	668550	740390	1901100	1452800	1790800	1018900	1042100	903590	1541700	1458300	1325300	C00082	ko00130,ko00261,ko00350,ko00360,ko00400,ko00460,ko00730,ko00940,ko00950,ko00965,ko00966,ko00970,ko00998,ko01100,ko01110,ko01210,ko01230
pme0137	187.07	125	188.08	C7H12N2O4	[M-H]-	N-α-Acetyl-L-glutamine	Amino acids and derivatives	Amino acids and derivatives	102640	65661	74734	238980	130470	98101	70137	101850	68997	240270	310060	224550	200390	163620	181410	--	--
mws5041	189.12	86.1	188.116	C8H16N2O3	[M+H]+	Glycylisoleucine*	Amino acids and derivatives	Amino acids and derivatives	5788800	3953700	5385200	4982600	2720400	2858200	4299800	4588200	6312300	4405100	4547100	4796600	4794000	4810900	4815300	--	--
pme0122	189.12	126	188.116	C8H16N2O3	[M+H]+	N6-Acetyl-L-lysine	Amino acids and derivatives	Amino acids and derivatives	357130	324270	619040	184470	182430	295400	441270	360390	439120	390470	305730	314500	359280	362150	398000	C02727	ko00310,ko01100
mws0736	189.12	86	188.116	C8H16N2O3	[M+H]+	N-Glycyl-L-leucine*	Amino acids and derivatives	Amino acids and derivatives	7718900	5019500	7044500	6578500	3310700	3756500	5314900	5649100	8165300	5725000	5966800	6289900	6126800	5844600	6166200	C02155	--
pme3388	189.13	144	188.127	C7H16N4O2	[M+H]+	Homoarginine	Amino acids and derivatives	Amino acids and derivatives	150700	78402	88102	42188	45024	79025	91660	68983	115550	104920	82798	63714	91495	98540	98085	C01924	--
pme0075	188.1	128	189.064	C7H11NO5	[M-H]-	N-Acetyl-L-glutamic acid	Amino acids and derivatives	Amino acids and derivatives	307280	229510	269960	233260	203830	252080	647090	283790	343130	461860	326660	203970	344990	318000	348640	C00624	ko00220,ko01100,ko01110,ko01210,ko01230
pme0278	191.1	128	190.095	C7H14N2O4	[M+H]+	2,6-Diaminooimelic acid	Amino acids and derivatives	Amino acids and derivatives	1246400	332300	882300	301070	278380	584200	796540	401060	918060	498930	214100	321350	609500	537130	640730	C00666	ko00300,ko01100,ko01110,ko01230
mws5037	203.14	86.1	202.132	C9H18N2O3	[M+H]+	Alanylleucine	Amino acids and derivatives	Amino acids and derivatives	333910	240540	410180	213530	459860	410070	262080	379020	355450	123270	130000	170090	300750	281100	302620	--	--
mws0282	203.08	116.05	204.09	C11H12N2O2	[M-H]-	L-Tryptophan	Amino acids and derivatives	Amino acids and derivatives	20444000	14834000	15097000	4983200	6192800	7158600	21179000	19536000	21855000	9975400	9837200	7551700	14664000	13543000	14973000	C00078	ko00260,ko00380,ko00400,ko00901,ko00966,ko00970,ko00998,ko01100,ko01110,ko01210,ko01230
Lmhp002764	211.13	70.07	211.144	C11H18N2O2	[M+H]+	Cyclo(Pro-Leu)	Amino acids and derivatives	Amino acids and derivatives	29076	40337	30746	22915	15235	20498	21222	27736	34037	29856	28436	45452	25927	30116	29142	--	--
mws5042	223.11	120.09	222.1	C11H14N2O3	[M+H]+	Glycylphenylalanine	Amino acids and derivatives	Amino acids and derivatives	4319300	2808400	3785200	3075600	1342200	1781000	3267100	3390100	4899500	3173300	3145800	3038300	3236000	3284100	3341100	--	--
mws0520	224.09	136	223.084	C11H13NO4	[M+H]+	N-Acetyl-L-tyrosine	Amino acids and derivatives	Amino acids and derivatives	48318	36193	32976	30768	28241	40024	65830	38893	33067	70573	37836	55440	39358	36748	40256	--	--
Lmhp001430	227.09	116.07	227.103	C10H14N2O4	[M+H]+	Cyclo(Pro-Glu)	Amino acids and derivatives	Amino acids and derivatives	775280	518320	540710	453220	399650	441040	632870	533770	594200	440680	607730	396810	619330	559100	549440	--	--
Lmhp001461	229.15	70.07	229.154	C11H20N2O3	[M+H]+	L-Prolyl-L-Leucine	Amino acids and derivatives	Amino acids and derivatives	9993600	7800400	8512200	7543400	3400400	3877800	7167100	7919100	10415000	6185400	7960700	7511400	6843500	7630200	8018000	--	--
Lmhp001670	231.16	72.08	231.17	C11H22N2O3	[M+H]+	L-Valyl-L-Leucine	Amino acids and derivatives	Amino acids and derivatives	10647000	8116200	9599400	9893100	5894500	6229500	10654000	10068000	11776000	10960000	11425000	10864000	10130000	10440000	10455000	--	--
mws4176	237.12	120.09	236.116	C12H16N2O3	[M+H]+	L-Alanyl-L-Phenylalanine	Amino acids and derivatives	Amino acids and derivatives	1593500	1124400	1344600	1264100	560640	602540	1140000	1063200	1446500	883490	1006700	921820	1097600	1046500	1181000	--	--
Lmhp002031	245.18	86.1	245.186	C12H24N2O3	[M+H]+	L-Leucyl-L-Leucine	Amino acids and derivatives	Amino acids and derivatives	2511100	1783300	1880700	2150600	1108700	1159400	1699600	1496700	2730300	1722600	1916600	1919700	1987800	2044100	1915400	--	--
pmb2591	245.09	203.2	246.1	C13H14N2O3	[M-H]-	Acetyltryptophan	Amino acids and derivatives	Amino acids and derivatives	55278	30312	51326	498680	453110	325560	37714	28026	38246	809300	699110	843420	291670	328760	361940	C03137	--
Lmrj002087	247.13	86.09	246.121	C10H18N2O5	[M+H]+	L-Isoleucyl-L-Aspartate	Amino acids and derivatives	Amino acids and derivatives	2476000	1381500	1826100	2374100	909800	871050	1446700	1372800	2294000	1637200	1873400	1857400	1709700	2076600	1626900	--	--
Lmhp001732	263.13	70.07	263.139	C14H18N2O3	[M+H]+	L-Prolyl-L-Phenylalanine	Amino acids and derivatives	Amino acids and derivatives	391890	362860	313880	531470	183530	255520	279980	339040	421540	331010	347900	363230	344390	336620	328170	--	--
mws0715	263.1	145	264.111	C13H16N2O4	[M-H]-	Phenylacetyl-L-glutamine	Amino acids and derivatives	Amino acids and derivatives	71970	3912.3	9	65771	6303.8	12971	8198.3	3039.5	3780.6	11378	9	9	19017	16502	13854	C04148	ko00360
Lmhp002001	265.15	72.08	265.155	C14H20N2O3	[M+H]+	L-Valyl-L-Phenylalanine	Amino acids and derivatives	Amino acids and derivatives	1882100	1460200	2180200	1541200	1171200	1378800	1885700	1423800	1468900	2015300	1465000	1265300	1389300	1183300	1541700	--	--
pme2890	269.06	136	268.055	C8H16N2O4S2	[M+H]+	L-Homocystine	Amino acids and derivatives	Amino acids and derivatives	121040	85030	90886	74905	53720	47259	60727	58600	110330	89808	102230	84640	100810	76206	87040	C01817	ko00270
mws5035	279.17	120.08	278.163	C15H22N2O3	[M+H]+	Leucylphenylalanine	Amino acids and derivatives	Amino acids and derivatives	1829500	1376000	1654100	1513100	1087900	1146500	1460400	1292300	1951800	1535800	1376200	1539400	1631800	1400000	1466700	--	--
mws0629	281.11	166	280.106	C13H16N2O5	[M+H]+	L-Aspartyl-L-Phenylalanine	Amino acids and derivatives	Amino acids and derivatives	183390	120510	146920	218780	199090	159340	168100	145460	140330	216160	213240	188040	195840	170910	166470	--	--
mws0636	313.15	166	312.147	C18H20N2O3	[M+H]+	L-Phenylalanyl-L-phenylalanine	Amino acids and derivatives	Amino acids and derivatives	79495	47774	61671	53156	41897	28916	70545	52630	75737	64268	48733	60601	69705	60554	62724	--	--
mws0582	322.11	130	321.099	C11H19N3O6S	[M+H]+	S-(Methyl)glutathione	Amino acids and derivatives	Amino acids and derivatives	89448	81425	59241	75560	74145	60035	47002	38736	34195	35236	40379	26150	69961	64779	68099	C11347	--
pme0376	271.06	151	272.068	C15H12O5	[M-H]-	Naringenin	Flavonoids	Dihydroflavone	9	9	32453	9	23675	37416	52720	27275	66760	38902	7666.2	49545	32534	32038	30340	C00509	ko00941,ko00943,ko01100,ko01110
pme0460	291.09	139.04	290.079	C15H14O6	[M+H]+	Epicatechin	Flavonoids	Flavanols	84660	32565	26553	106850	45256	9	7700.1	28766	21394	43920	76930	35148	44181	52038	43900	C09727	ko00941,ko01100,ko01110
pmc1990	299.1	223.1	300.1	C17H16O5	[M-H]-	4'-Hydroxy-5,7-dimethoxyflavanone	Flavonoids	Flavanols	765920	854060	889620	764380	941930	892090	868150	875570	834960	773250	637170	670660	1832400	1921700	2047200	--	--
pmp000804	313.14	277.2	312.136	C19H20O4	[M+H]+	Isobavachalcone D	Flavonoids	Chalcones	122600	65213	67135	37408	22536	22904	83434	86259	114740	223310	221930	157150	102350	107160	101780	--	--
mws0043	403.14	373.1	402.131	C21H22O8	[M+H]+	Nobiletin	Flavonoids	Flavonoid	84284	18597	18281	19342	24617	20049	21646	17901	20292	20471	15553	14387	23602	26467	25956	C10112	--
HJAP012	419.09	383.07	418.089	C20H18O10	[M+H]+	Luteolin-C-pentoside	Flavonoids	Flavonoid	13423	32030	57987	24536	20656	14822	54685	47281	70602	48138	47193	40758	57361	43532	36487	--	--
Lmlp003201	433.11	283.06	432.105	C21H20O10	[M+H]+	Apigenin-8-C-glucoside	Flavonoids	Flavonoid carbonoside	9	9	9	24166	25184	17994	9	9	9	7684.3	15527	10691	8476.4	10215	10976	C01460	ko00941,ko00944
Lmyp002204	451.12	289.13	450.116	C21H22O11	[M+H]+	Hovertichoside C	Flavonoids	Sinensetin	28806	26133	19844	47245	62535	35846	17067	16682	12193	17929	31137	15686	30736	24743	25518	--	--
pmb3012	461.11	299.2	462.116	C22H22O11	[M-H]-	Chrysoeriol-7-O-glucoside	Flavonoids	Flavonoid	33364	31165	27052	56483	42836	51184	36836	23753	28580	69868	66220	74191	44566	50618	55792	--	--
pmp001309	465.1	303.1	464.095	C21H20O12	[M+H]+	6-Hydroxykaempferol-7-O-glucoside	Flavonoids	Flavonols	9	9	9	59316	84094	56657	9	9	9	88146	88685	75240	37677	46913	51772	--	--
pmb3042	491.12	329.1	492.127	C23H24O12	[M-H]-	Tricin-5-O-Glucoside	Flavonoids	Flavonoid	72953	79742	97880	126600	118800	109140	66731	45075	54864	145530	195650	175730	104090	105240	114690	--	--
pmb3041	521.09	329.2	522.101	C23H22O14	[M-H]-	Tricin-O-saccharic acid	Flavonoids	Flavonoid	381340	559350	516930	1204100	1179000	1184100	422250	293010	377600	2098700	2023800	1672600	1165000	1035700	1072000	--	--
pmb3053	523.12	329.2	524.132	C27H24O11	[M-H]-	Tricin-O-eudesmic acid	Flavonoids	Flavonoid	8682	8454.4	7736.5	13492	11820	10476	8785	7518.6	8648.6	10364	9216.6	11595	9065.8	10740	10231	--	--
mws1292	565.16	409.09	564.123	C26H28O14	[M+H]+	Isoschaftoside	Flavonoids	Flavonoid carbonoside	44369	18099	21498	24633	29189	28727	47266	24279	25402	19479	28430	24472	29967	29931	30752	--	--
pme3227	579.17	433	578.164	C27H30O14	[M+H]+	Vitexin-2''-O-rhamnoside	Flavonoids	Flavonoid carbonoside	74323	15726	6212.7	49095	12117	11959	23159	58945	34074	15686	15916	15387	23014	29545	24303	C12628	ko00944
mws1661	609.18	301	608.174	C28H32O15	[M+H]+	Diosmin	Flavonoids	Flavonoid	4270.3	2295.3	9	210570	272880	215300	23845	5469	9	181120	260080	274610	117470	135800	143320	C10039	--
mws0036	609.18	301.09	610.19	C28H34O15	[M-H]-	Hesperetin-7-O-rutinoside (Hesperidin)*	Flavonoids	Dihydroflavone	122610	82399	26876	17376	13761	44263	28141	26021	15088	20267	11915	16429	39265	33117	41208	C09755	--
pme0001	609.18	301	610.19	C28H34O15	[M-H]-	Hesperetin-7-O-neohesperidoside(Neohesperidin)*	Flavonoids	Dihydroflavone	136960	100360	21330	22230	17916	62568	39764	21774	22521	35411	27734	21657	42117	40793	45525	C09806	ko00941
Hmgp003086	639.19	331.09	638.184	C29H34O16	[M+H]+	Tricin-O-rutinoside	Flavonoids	Flavonoid	74294	43248	34143	421700	443680	293000	51542	45701	40401	202510	418380	387700	215380	235110	215450	--	--
Lmgp004573	639.19	331.08	638.185	C29H34O16	[M+H]+	5,7,4'-trihydroxy-6,8-dimethoxy isoflavone-7-O-galactoside-glucose	Flavonoids	Isoflavones	67910	40510	38684	417840	430830	285920	49370	37155	37230	198270	448040	391880	221110	226000	216650	--	--
Hmgp002953	653.17	331.09	652.164	C29H32O17	[M+H]+	Tricin-O-glucuronate-O-rhamnoside	Flavonoids	Flavonoid	15927	7624.7	5298.2	152480	132070	80231	13478	10574	6399.2	34857	77728	116030	63294	47637	48655	--	--
pmp001082	667.19	361.09	666.18	C30H34O17	[M+H]+	Sudachiin C	Flavonoids	Flavonoid	2513.1	5248.1	5512.2	49929	40481	37061	10889	8898	8550	70741	57901	75961	30268	32503	35298	--	--
pme2996	161.02	116.6	162.032	C9H6O3	[M-H]-	4-Hydroxycoumarin	Lignans and Coumarins	Coumarins	50166	33677	40804	24076	32029	21611	49073	32341	31480	37340	31595	25761	32997	33947	34251	C20414	--
mws1013	177.02	133.2	178.027	C9H6O4	[M-H]-	Esculetin	Lignans and Coumarins	Coumarins	22362	43693	21816	36851	27578	24590	66914	69476	81466	50034	57926	84582	48152	35548	47295	C09263	--
pmb0235	323.09	177.4	322.084	C19H14O5	[M+H]+	O-Feruloyl coumarin	Lignans and Coumarins	Coumarins	321780	234550	485810	52904	53775	99756	1574500	1257900	1530300	309180	253530	224280	625630	583750	581550	--	--
pmb0808	353.1	179	352.079	C16H16O9	[M+H]+	Esculetin 6-O-quinic acid	Lignans and Coumarins	Coumarins	148670	132230	89899	188910	176560	126690	86425	75761	56284	105970	117450	119950	124150	110870	110040	--	--
mws0097	357.13	151	358.142	C20H22O6	[M-H]-	Pinoresinol*	Lignans and Coumarins	Lignans	55269	51802	68407	33822	24273	18386	41945	26362	40986	80139	66091	72895	57239	49057	48721	C05366	ko00998,ko01110
Lmdn004267	357.13	151.04	358.142	C20H22O6	[M-H]-	Epipinoresinol*	Lignans and Coumarins	Lignans	51924	54177	60514	29001	24190	17974	36280	25799	36750	73026	55742	56215	48461	51618	48041	--	--
Lmgp003270	369.16	177.06	368.074	C16H16O10	[M+H]+	Scopoletin-O-Glucuronide	Lignans and Coumarins	Coumarins	1054800	990460	997010	421080	406410	441620	1856100	1766300	1571400	600360	553290	658710	1058900	943500	901460	--	--
pma0104	369.12	207.1	368.09	C20H16O7	[M+H]+	N-Sinapoylhydroxycoumarin	Lignans and Coumarins	Coumarins	352640	276990	317670	314970	234690	243080	605600	486490	791490	450390	611900	549670	438500	482060	496170	--	--
Hmgn004139	373.13	329.05	374.136	C20H22O7	[M-H]-	Isohydroxymatairesinol	Lignans and Coumarins	Lignans	60984	49949	63929	112700	81038	83776	71646	49583	60919	258450	229620	278620	135650	132150	129530	--	--
pmb2723	485.13	323.2	486.137	C21H26O13	[M-H]-	4-Hydroxycoumarin di-glucoside	Lignans and Coumarins	Coumarins	42164	25121	30854	72597	67426	36193	40116	24123	30724	60633	63273	46663	44083	33696	39977	--	--
pmn001378	519.19	357.14	520.194	C26H32O11	[M-H]-	Terpineol mono-glucoside	Lignans and Coumarins	Lignans	115130	140540	111240	123810	87366	81412	60971	40194	66181	286020	202150	210840	129950	109720	104360	--	--
pmn001375	535.18	373.13	536.189	C26H32O12	[M-H]-	1-Hydroxyterpinin monoglucoside	Lignans and Coumarins	Lignans	70104	60716	63230	234340	180640	164040	53451	49493	55674	272190	275660	262600	160570	156860	149660	--	--
Hmln002355	549.2	387.15	550.204	C27H34O12	[M-H]-	5'-Methoxymatairesinoside	Lignans and Coumarins	Lignans	263400	196040	239970	9	9	9	358910	270890	288430	9	9	9	131260	134740	131360	--	--
Rfmb25702	561.2	357.13	562.205	C28H34O12	[M-H]-	Pinoresinol-acetylglucose	Lignans and Coumarins	Lignans	15034	10368	15598	11318	5911.5	5903.9	13471	7781.8	10408	20093	15414	15723	11362	11543	12587	--	--
Rfmb26203	579.21	417.16	580.216	C28H36O13	[M-H]-	Syringaresinol-Glucoside	Lignans and Coumarins	Lignans	51686	43244	48045	181430	123150	116540	69035	42110	49799	283140	299960	281920	130180	126860	160400	--	--
Rfmb26201	621.22	417.16	622.226	C30H38O14	[M-H]-	Syringaresinol-acetylGlucoside	Lignans and Coumarins	Lignans	22640	12767	15232	40268	29945	25316	16208	11065	13453	41781	42280	33666	27923	25700	24315	--	--
pmn001370	681.24	519.19	682.247	C32H42O16	[M-H]-	Pinoresinol diglucoside	Lignans and Coumarins	Lignans	118030	148450	133040	177180	139880	165850	118890	62311	109630	202280	231110	187490	150980	155940	159100	--	--
pmn001369	697.23	535.18	698.242	C32H42O17	[M-H]-	1-Hydroxypineolin Diglucoside	Lignans and Coumarins	Lignans	9	9	9	98079	112800	92728	9	9	8893.6	47450	71160	65498	41294	39387	42980	--	--
mws0752	185.15	185.16	186.162	C11H22O2	[M-H]-	Undecylic Acid	Lipids	Free fatty acids	628060	458780	509640	849310	813720	1384400	1421600	808150	869890	866650	911770	855220	830470	876340	1011600	--	--
pmb2640	199.17	181	200.178	C12H24O2	[M-H]-	Lauric acid	Lipids	Free fatty acids	18397	12309	9618.3	15004	12384	13483	16895	12034	11179	14298	12559	11765	16247	14696	15916	C02679	ko00061,ko01100,ko01110
mws0751	213.19	195	214.193	C13H26O2	[M-H]-	Tridecanoic Acid	Lipids	Free fatty acids	4893.5	5066.5	5319.3	5878.8	4905.8	5794.6	3922.7	3480.2	2554.2	4759.3	5682.6	3502.2	6096.5	6273	5365.8	--	--
mws0119	227.2	227.2	228.209	C14H28O2	[M-H]-	Myristic Acid	Lipids	Free fatty acids	16819000	17166000	16112000	16103000	16386000	14917000	16786000	11341000	11320000	13767000	13062000	10263000	14100000	13706000	14913000	C06424	ko00061,ko01100
mws0359	241.22	241.22	242.225	C15H30O2	[M-H]-	Pentadecanoic Acid	Lipids	Free fatty acids	1238800	1554400	1256000	1620300	1899900	1668900	1086800	841060	1038300	1646000	1421700	1526800	1446600	1294600	1610800	--	--
mws0361	253.22	235.19	254.225	C16H30O2	[M-H]-	Palmitoleic Acid	Lipids	Free fatty acids	48095	95084	56219	44172	47215	40270	42522	36747	46134	31443	30266	30612	42232	37102	41688	C08362	ko00061
pmn001578	255.23	255.23	256.24	C16H32O2	[M-H]-	Palmitic acid	Lipids	Free fatty acids	28195000	33803000	31414000	30758000	41945000	29667000	24303000	31610000	27851000	27741000	27135000	31194000	30804000	30670000	34627000	C00249	ko00061,ko00062,ko00071,ko00073,ko01040,ko01100,ko01212
Hmsn000210	133.01	115.01	266.224	C17H30O2	[M-H]-	Methyl 7,10-hexadecadienoate	Lipids	Free fatty acids	887450	632130	712900	974090	766180	715140	894570	866430	1445300	2287600	1880900	2052400	1169100	1142600	1279300	--	--
mws0383	267.23	267.23	268.24	C17H32O2	[M-H]-	Cis-10-Heptadecenoic Acid	Lipids	Free fatty acids	9646600	8030500	10675000	10384000	9856400	8802500	23312000	15588000	10603000	21863000	19670000	13622000	15055000	13507000	16934000	--	--
mws0362	269.25	269.24	270.256	C17H34O2	[M-H]-	Margaric Acid	Lipids	Free fatty acids	214050	135310	209150	215810	193080	157930	514500	340050	208320	517910	408610	306410	298090	289150	338800	--	--
pmp001264	274.27	256.27	273.267	C16H35NO2	[M+H]+	Hexadecylsphingosine	Lipids	Sphingolipids	577710	9	89422	72593	94250	62508	210910	9	9	78378	633050	218430	197950	176830	174350	--	--
pmb1650	279.2	149.4	278.225	C18H30O2	[M+H]+	Octadeca-11E,13E,15Z-trienoic acid	Lipids	Glycerol ester	5371300	4547600	6045800	6208100	5618500	9845500	5204100	6303000	5752000	5624700	5478300	5717900	6579200	6630300	6333000	--	--
mws0366	277.22	277.22	278.225	C18H30O2	[M-H]-	γ-Linolenic Acid*	Lipids	Free fatty acids	15200000	17996000	17668000	16124000	17714000	16896000	20688000	19121000	20459000	21503000	19155000	18802000	20012000	19041000	20091000	C06426	ko00591,ko01040,ko01100
mws0367	277.22	277.22	278.225	C18H30O2	[M-H]-	α-Linolenic Acid*	Lipids	Free fatty acids	13905000	16185000	15661000	14908000	16242000	15777000	19276000	17810000	19220000	19708000	17429000	16851000	18444000	18048000	17846000	C06427	ko00592,ko01040,ko01100,ko01110
Lmbn005923	277.22	59.01	278.225	C18H30O2	[M-H]-	Crepenynic acid	Lipids	Free fatty acids	265920	296250	282250	261480	290020	273370	389870	320120	327280	364150	321600	310010	320610	320780	336780	C07289	ko00591
pmb0889	279.23	95.1	278.225	C18H30O2	[M+H]+	Punicic acid	Lipids	Free fatty acids	6484700	4210400	3654600	5082800	3082300	3210600	4654800	4187400	4545700	4785100	5211700	4713200	4738900	4888200	4474100	C08364	--
Lmbn006152	279.23	59.01	280.24	C18H32O2	[M-H]-	(9Z,11E)-Octadecadienoic acid	Lipids	Free fatty acids	35991	49640	37370	39005	60500	42770	41355	48492	43340	41305	34614	43523	42667	43014	49160	C04056	ko00591
mws1491	279.23	279.23	280.24	C18H32O2	[M-H]-	Linoleic acid	Lipids	Free fatty acids	24778000	29442000	26249000	26847000	37015000	29088000	27238000	28516000	27858000	26780000	24755000	29183000	27198000	28472000	33447000	C01595	ko00591,ko01040,ko01100
mws0396	281.25	281.25	282.256	C18H34O2	[M-H]-	Elaidic Acid	Lipids	Free fatty acids	25381000	28302000	24607000	26338000	31993000	21184000	31316000	27150000	25194000	28915000	34137000	29570000	29344000	29071000	33728000	C01712	--
mws2623	281.25	281.25	282.256	C18H34O2	[M-H]-	11-Octadecanoic acid(Vaccenic acid)	Lipids	Free fatty acids	14127000	18081000	15600000	16005000	20323000	13237000	18575000	16636000	14449000	18610000	19523000	18335000	17030000	17152000	19920000	--	--
mws1489	283.26	283.26	284.272	C18H36O2	[M-H]-	Stearic Acid	Lipids	Free fatty acids	22485000	22247000	17460000	20998000	28026000	22427000	21054000	19960000	19618000	19314000	19437000	17279000	8788500	8562700	9293400	C01530	ko00061,ko01040
Zmyn004548	291.2	235.17	292.204	C18H28O3	[M-H]-	12-Oxo-phytodienoic acid	Lipids	Free fatty acids	86354	62809	73903	120100	64139	85592	98799	92234	79019	163650	162040	120570	104970	109270	115450	C01226	ko00592,ko01100,ko01110
pmb2786	293.21	275	294.219	C18H30O3	[M-H]-	9-HOTrE	Lipids	Free fatty acids	3191700	2785100	2321800	2897900	2099000	2076800	4565100	3868500	4699300	4431900	4514300	4034700	3599500	3624500	3626400	--	--
Zmpn003368	293.21	195.14	294.219	C18H30O3	[M-H]-	13S-Hydroxy-9Z,11E,15Z-octadecatrienoic acid	Lipids	Free fatty acids	395830	296510	288060	356760	215820	226510	529150	423060	529610	613620	520090	402440	423380	419590	437820	C16316	ko00592
pmb2792	293.21	193.1	294.219	C18H30O3	[M-H]-	13-HOTrE(r)	Lipids	Free fatty acids	51420	61764	69941	63660	69620	81100	55535	62935	80272	59335	58495	65074	64019	67184	66407	--	--
pmn001688	295.23	195.14	296.235	C18H32O3	[M-H]-	9S-Hyroxy-10E,12E-octadecadienoic acid*	Lipids	Free fatty acids	6985600	4705000	4959600	6761800	4025600	4227100	5724100	4923900	5259000	6479800	6834800	5610800	6128000	6186100	6072300	--	--
Lmbn005369	295.23	195.14	296.235	C18H32O3	[M-H]-	13(S)-HODE;13(S)-Hydroxyoctadeca-9Z,11E-dienoic acid	Lipids	Free fatty acids	7033800	4749000	4790000	6798700	4035600	4291900	5453400	4719600	5124400	6167700	6510800	5447700	6316500	5869200	5988400	C14762	ko00591
pmb2778	295.23	277.3	296.235	C18H32O3	[M-H]-	9,10-EODE*	Lipids	Free fatty acids	2768500	1945200	1665800	2235100	1621200	1541600	2182600	1886900	2154200	1998300	2259000	2016500	2227500	2151500	2279200	--	--
pmb2799	295.23	195.2	296.235	C18H32O3	[M-H]-	12,13-EODE	Lipids	Free fatty acids	945780	847120	813770	973950	499860	498510	786100	649370	725460	722100	876420	621340	942420	883200	903930	--	--
Zmyn004714	297.24	183.14	298.251	C18H34O3	[M-H]-	Ricinoleic acid	Lipids	Free fatty acids	167820	76940	111010	125450	75015	102970	191540	118800	131300	194740	198130	162070	174290	164130	175890	C08365	--
pmf0297	297.32	183.1	298.324	C20H42O	[M-H]-	1-Eicosanol	Lipids	Glycerol ester	167770	76874	102860	123510	72735	103420	180700	121410	125790	189030	198080	162480	166800	150420	162870	--	--
Zmyn005384	299.26	253.26	300.266	C18H36O3	[M-H]-	2R-Hydroxyoctadecanoic Acid	Lipids	Free fatty acids	207050	136040	184790	158800	142660	162380	252640	189580	197990	326490	268770	301260	225670	196920	226880	C03042	--
mws0397	301.22	257.23	302.225	C20H30O2	[M-H]-	Cis-5,8,11,14,17-Eicosapentaenoic Acid	Lipids	Free fatty acids	49378	71189	70801	42511	66667	46759	75167	103990	114920	109800	178970	150740	106060	102730	105830	C06428	ko01040
mws0369	303.23	258.9	304.24	C20H32O2	[M-H]-	Arachidonic Acid	Lipids	Free fatty acids	555180	371460	396330	541400	599420	378240	402420	450070	462690	643640	730910	597270	493580	504770	513800	C00219	ko00590,ko00591,ko01040,ko01100
pmn001610	307.26	307.3	308.272	C20H36O2	[M-H]-	Eicosadienoic acid	Lipids	Free fatty acids	1847100	1727300	1576600	1581000	1128400	958080	1134100	762440	693060	1032600	1316700	1023300	1176600	1154700	1333400	C16525	ko01040
pmb2791	309.21	209.1	310.1	C18H30O4	[M-H]-	9-HpOTrE	Lipids	Glycerol ester	235180	188630	191260	312310	158460	191200	277540	203860	244430	360850	376270	258760	277690	272280	263890	C16321	ko00592,ko01110
pmb2789	309	209	310.214	C18H30O4	[M-H]-	13-HpOTrE(r)	Lipids	Glycerol ester	351480	286160	321410	436000	236780	277990	348280	252030	363390	497210	536210	398410	394200	393630	357170	--	--
pmn001606	309.28	309.3	310.287	C20H38O2	[M-H]-	Eicosenoic acid	Lipids	Free fatty acids	2117900	2733900	2484400	2374900	2984100	1374000	1904200	2821500	1757800	1328800	1848500	2440300	17962	14162	15773	C16526	ko01040
Lmbn005287	311.22	249.22	312.23	C18H32O4	[M-H]-	7S,8S-DiHODE; (9Z,12Z)-(7S,8S)-Dihydroxyoctadeca-9,12-dienoic acid	Lipids	Free fatty acids	15506	11808	11581	25435	15113	12844	46213	63716	40620	33644	55315	38973	37128	35375	35164	C07354	ko00591
pmn001689	311.22	223.17	312.23	C18H32O4	[M-H]-	9-Hydroxy-12-oxo-10-octadecenoic acid*	Lipids	Free fatty acids	69335	48117	57628	73408	51707	48656	53112	50325	50288	76597	60765	72541	58182	70967	73299	--	--
pmb2804	311.1	171.3	312.23	C18H32O4	[M-H]-	13-HPODE*	Lipids	Glycerol ester	22132000	17965000	14488000	17378000	12236000	11114000	15744000	14075000	17346000	12718000	13898000	13488000	16519000	16578000	16628000	C04717	ko00591,ko01100
Lmbn004685	311.22	223.17	312.23	C18H32O4	[M-H]-	5S,8R-DiHODE; (5S,8R,9Z,12Z)-5,8-Dihydroxyoctadeca-9,12-dienoate	Lipids	Free fatty acids	72007	47928	58684	71716	50590	50644	59972	47420	52089	71874	56024	61786	65617	57449	68029	C20186	ko00591
Rfmb087	311.22	293.21	312.23	C18H32O4	[M-H]-	13-Oxo-9-hydroxy-10-octadecenoic acid*	Lipids	Free fatty acids	28702000	21010000	18370000	14929000	10276000	9111600	10851000	9801000	11435000	6375600	7530200	7281400	15204000	14816000	14997000	--	--
Lmbn005487	313.24	251.24	314.246	C18H34O4	[M-H]-	12,13-DHOME; (9Z)-12,13-Dihydroxyoctadec-9-enoic acid	Lipids	Free fatty acids	35058	11610	12407	18822	14527	16349	33011	24951	20339	24529	34370	21850	31117	25943	27813	C14829	ko00591
mws0954	319.23	115.04	320.235	C20H32O3	[M-H]-	5(S)-HETE	Lipids	Free fatty acids	18159	9344.8	9173	10258	6468.1	5539.3	8907.5	6828	10600	10331	10840	8603.5	10445	11364	12528	C04805	ko00590
pmn001691	327.22	291.2	328.225	C18H32O5	[M-H]-	9,12,13-Trihyroxy-10,15-octadecadienoic acid	Lipids	Free fatty acids	3671500	2933000	3126900	2227600	1357200	1494000	6579400	6030600	8098000	4135900	4095100	3578000	4377200	4305200	4356800	--	--
Lmbn004240	329.23	199.13	330.241	C18H34O5	[M-H]-	9,10-Dihydroxy-12,13-epoxyoctadecanoic acid	Lipids	Free fatty acids	108100	73084	73342	81434	52186	53901	99102	91183	120710	117610	105890	93010	102610	93067	98031	C14837	ko00591
Lmbn003970	329.23	211.14	330.241	C18H34O5	[M-H]-	9,12,13-TriHOME; 9(S),12(S),13(S)-Trihydroxy-10(E)-octadecenoic acid	Lipids	Free fatty acids	5379900	5740900	4070100	4128500	2901800	3314800	8828800	7904700	11238000	7019200	6514300	6136400	7426000	6396200	7060200	C14833	ko00591
pmn001694	329.23	229.15	330.241	C18H34O5	[M-H]-	9,10,13-Trihyroxy-11-octadecadienoic acid	Lipids	Free fatty acids	8518300	6311100	6203000	5934800	3396400	3487000	10370000	9295000	12283000	6928800	7678600	6278700	8152300	7923900	7912400	--	--
mws0930	329.25	285.26	330.256	C22H34O2	[M-H]-	Docosapentaenoic acid	Lipids	Free fatty acids	30493	14130	22306	27328	26084	18359	20474	2824.2	4644.2	16579	3679.9	5589	15100	15879	18835	C16513	ko01040
pmp001284	331.28	313.27	330.277	C19H38O4	[M+H]+	Monopalmitin	Lipids	Glycerol ester	54503	50230	24069	37900	49277	49499	46714	36404	34644	54456	35242	28049	58205	50037	49102	--	--
pmf0400	339.33	183.2	340.334	C22H44O2	[M-H]-	Docosanoic acid	Lipids	Glycerol ester	1183600	1599500	711980	734930	1083100	550530	695130	996340	613240	739000	678680	931440	85309	81458	79022	C08281	ko00073,ko01040
pmb1562	351.25	146.9	350.246	C21H34O4	[M+H]+	MAG(18:4)isomer3	Lipids	Glycerol ester	619770	543290	546860	685060	350720	483790	1068200	925600	1170000	907300	880970	628440	808630	739880	759080	--	--
Lmhp011388	353.27	261.22	352.261	C21H36O4	[M+H]+	2-γ-Linolenoyl-glycerol*	Lipids	Glycerol ester	14215000	14457000	13853000	11922000	11003000	11428000	16830000	16817000	17208000	16183000	14696000	15769000	15827000	15345000	14350000	--	--
Lmhp011562	353.27	261.22	352.261	C21H36O4	[M+H]+	1-α-Linolenoyl-glycerol*	Lipids	Glycerol ester	1703900	1441100	1122400	1919600	1059300	1094400	2899200	1944800	2254500	3165800	3548000	3495400	2358900	2331600	2189800	--	--
pmp001283	355.28	337.27	354.277	C21H38O4	[M+H]+	Glyceryl linoleate	Lipids	Glycerol ester	1503200	1409500	1056000	1033500	847390	790620	121010	135780	619810	342440	291200	648670	790890	772930	733900	--	--
pmb0164	355.28	147.2	354.277	C21H38O4	[M+H]+	MAG(18:2)isomer1	Lipids	Glycerol ester	84371	112320	116640	88771	71879	81457	50761	38296	56480	57829	40401	87673	67523	78670	67478	--	--
pmb0890	355.28	263.3	354.277	C21H38O4	[M+H]+	MAG(18:2)*	Lipids	Glycerol ester	31089000	31638000	29443000	29140000	28297000	26972000	28313000	26028000	27318000	27977000	28076000	27901000	28806000	29897000	26935000	--	--
pmb0296	357.3	265.4	356.293	C21H40O4	[M+H]+	MAG(18:1)isomer2*	Lipids	Glycerol ester	9878600	14408000	12493000	7592300	9268200	8353100	395940	500100	3535400	1411300	1171200	2966900	5897000	5449900	5354100	--	--
pmb2363	357.3	265.3	356.293	C21H40O4	[M+H]+	MAG(18:1)isomer1*	Lipids	Glycerol ester	9934500	14776000	13248000	7493300	9516100	8045200	390720	517210	3664900	1501900	1211100	3146600	5957600	5497000	5438200	--	--
Lmhp008337	426.26	285.24	425.254	C19H40NO7P	[M+H]+	LysoPE 14:0(2n isomer)*	Lipids	LPE	7479000	2662200	5468600	2245400	3764800	4098800	4253900	4226500	2377800	5379100	3245300	3681700	4177800	4217800	4104900	--	--
pmb0864	426.26	285.24	425.254	C19H40NO7P	[M+H]+	LysoPE 14:0*	Lipids	LPE	10574000	4070600	7940000	3389900	5761200	6245000	6241100	6002500	3662000	8139900	5080500	5479200	6385900	6580500	6228700	--	--
Lmhp008273	438.26	297.24	437.254	C20H40NO7P	[M+H]+	LysoPE 15:1(2n isomer)*	Lipids	LPE	13097000	8205400	21394000	14144000	8139700	20630000	7031600	11067000	3292000	8282200	9033000	4355100	11813000	11202000	10932000	--	--
Lmhp008440	438.26	297.24	437.254	C20H40NO7P	[M+H]+	LysoPE 15:1*	Lipids	LPE	13085000	8116200	21080000	14091000	7562900	21567000	6923900	11242000	3147700	8086400	8533500	4318000	11581000	11025000	10674000	--	--
Lmhp008885	440.28	299.26	439.27	C20H42NO7P	[M+H]+	LysoPE 15:0(2n isomer)	Lipids	LPE	4803800	4832000	7077600	5622600	6413800	8042000	2921100	4390500	2206600	4517600	4963000	4296300	5335400	5404800	4939500	--	--
Lmhp009187	440.28	299.26	439.27	C20H42NO7P	[M+H]+	LysoPE 15:0	Lipids	LPE	4965700	4998300	6889800	5323600	6374400	8033500	2923900	4558300	2043900	4300500	4881900	4189100	5385900	5139200	5743900	--	--
pmb0862	440.28	184.07	439.27	C20H42NO7P	[M+H]+	LysoPC 12:0	Lipids	LPC	25585	16257	22040	13223	25388	27581	10993	17421	15402	16299	15449	17557	17010	16830	19073	--	--
Lmhp007836	448.25	307.23	447.239	C21H38NO7P	[M+H]+	LysoPE 16:3	Lipids	LPE	31481	31070	48760	23801	33395	42249	14710	11025	7240.6	13100	8114.3	10014	26159	24425	23428	--	--
Lmhp008763	452.28	311.26	451.27	C21H42NO7P	[M+H]+	LysoPE 16:1(2n isomer)*	Lipids	LPE	1133600	1337300	1183200	681190	1610900	1251500	1234900	1052900	434690	1079400	1340700	874690	1200400	1178600	1062100	--	--
Lmhp009034	452.28	311.26	451.27	C21H42NO7P	[M+H]+	LysoPE 16:1*	Lipids	LPE	1179500	1371800	1094900	618720	1742000	1304400	1236000	1044200	432410	1042700	1417900	940230	1301000	1220800	1146000	--	--
pmd0160	454.29	313.27	453.286	C21H44NO7P	[M+H]+	LysoPE 16:0(2n isomer)	Lipids	LPE	12524000	11744000	11478000	9433700	13674000	11964000	4528600	4490400	3937500	12432000	7768800	7760100	12832000	11831000	9721800	--	--
pmb0876	454.29	313.27	453.286	C21H44NO7P	[M+H]+	LysoPE 16:0*	Lipids	LPE	2741900	1248100	858630	2546400	1434200	650170	5430300	1822600	534420	11101000	10584000	5868300	5518900	4909200	3862800	--	--
Lmhp009769	466.29	325.27	465.286	C22H44NO7P	[M+H]+	LysoPE 17:1*	Lipids	LPE	2259600	1116200	1507600	1392100	1797700	1554000	1659000	1649000	937450	2007100	1888600	1448600	1779700	1756600	1582700	--	--
Lmhp009464	466.29	325.27	465.286	C22H44NO7P	[M+H]+	LysoPE 17:1(2n isomer)*	Lipids	LPE	2598900	1267000	1645900	1467900	1854300	1629700	1783900	1908800	995210	1976900	1921900	1600000	1861100	1724400	1718600	--	--
Lmhp010162	468.31	327.29	467.301	C22H46NO7P	[M+H]+	LysoPE 17:0	Lipids	LPE	934680	523390	2612600	632970	697590	1558300	116350	111570	95339	249100	293350	254390	754670	734310	648780	--	--
pmd0130	468.31	184.07	467.301	C22H46NO7P	[M+H]+	LysoPC 14:0(2n isomer)	Lipids	LPC	1523800	1085000	825950	867230	1586600	857750	584640	734250	534660	676400	657560	630690	841050	829420	782830	--	--
Lmhp008233	474.26	333.24	473.254	C23H40NO7P	[M+H]+	LysoPE 18:4	Lipids	LPE	77144	30203	48094	68043	53903	38321	9682.1	8269.1	4764.3	13874	6516.2	8753.7	31284	30400	28634	--	--
Lmhp008801	476.28	335.26	475.27	C23H42NO7P	[M+H]+	LysoPE 18:3*	Lipids	LPE	14256000	11976000	7282200	10130000	7944300	6330000	1644400	1235000	3247800	4031100	3895700	6646100	6902200	6249000	6134700	--	--
Lmhp008589	476.28	335.26	475.27	C23H42NO7P	[M+H]+	LysoPE 18:3(2n isomer)*	Lipids	LPE	15955000	12023000	7609700	10491000	9011600	7228100	1944200	1477200	3468400	4304000	4003400	6772000	7019400	6955200	6724400	--	--
pmb0874	478.29	337.27	477.286	C23H44NO7P	[M+H]+	LysoPE 18:2(2n isomer)*	Lipids	LPE	1298900	996060	616690	960510	855550	644840	84865	56137	144790	252250	266660	452280	526940	524920	507440	--	--
mws0289	480.31	339.29	479.301	C23H46NO7P	[M+H]+	LysoPE 18:1*	Lipids	LPE	39364000	30628000	25034000	24802000	39509000	33704000	10904000	9758100	7302200	14091000	19371000	22809000	23876000	24085000	22511000	--	--
pmb0856	480.31	339.29	479.301	C23H46NO7P	[M+H]+	LysoPE 18:1(2n isomer)*	Lipids	LPE	41186000	37713000	30649000	28054000	45839000	41695000	12190000	10993000	9069700	16748000	21327000	25454000	26993000	26346000	26335000	--	--
pmb2260	480.31	184.07	479.301	C23H46NO7P	[M+H]+	LysoPC 15:1	Lipids	LPC	507130	276860	338340	279840	160160	223920	122290	64215	61968	105730	75879	57214	189260	171700	167200	--	--
Lmhp009129	482.32	184.07	481.317	C23H48NO7P	[M+H]+	LysoPC 15:0(2n isomer)*	Lipids	LPC	1379000	1121100	666490	957350	1483100	777300	696090	681550	411730	843730	842580	928060	881030	900050	846170	--	--
pmb0883	482.32	341.31	481.317	C23H48NO7P	[M+H]+	LysoPE 18:0	Lipids	LPE	86706	63433	59671	65491	66476	57153	20517	10242	14335	44079	21873	28215	65800	62760	49243	--	--
pmb0880	482.32	341.31	481.317	C23H48NO7P	[M+H]+	LysoPE 18:0(2n isomer)	Lipids	LPE	235960	195080	169410	167680	286390	234480	63071	56487	44336	93843	133680	157600	149960	154460	161090	--	--
pmb2319	482.32	184.07	481.317	C23H48NO7P	[M+H]+	LysoPC 15:0*	Lipids	LPC	1318600	1015500	577850	729640	1382800	813140	164850	281310	314030	421090	431450	756650	738330	702340	564340	--	--
Hmyn007168	483.27	255.23	484.278	C22H45O9P	[M-H]-	LysoPG(16:0)	Lipids	Glycerol ester	285540	280620	317140	221470	297520	232760	305840	230460	104970	157600	402370	461910	54850	43894	39244	--	--
pmb0863	492.31	184.07	491.301	C24H46NO7P	[M+H]+	LysoPC 16:2(2n isomer)	Lipids	LPC	1071300	1069500	748410	565960	1538800	722120	495930	816480	586660	881330	731870	803580	817570	821340	827950	--	--
pmp001270	494.32	184.07	493.317	C24H48NO7P	[M+H]+	LysoPC 16:1*	Lipids	LPC	16576000	11335000	9594400	8968600	16077000	10690000	9045000	13342000	12340000	13378000	13521000	18141000	13064000	12386000	12153000	--	--
pmd0132	496.34	184.07	495.332	C24H50NO7P	[M+H]+	LysoPC 16:0(2n isomer)	Lipids	LPC	10388000	13595000	5877800	7946000	15137000	8339400	1112000	1461200	2004100	4899200	4858900	6593200	7690900	7216600	6061200	--	--
pmb0855	496.34	184.07	495.332	C24H50NO7P	[M+H]+	LysoPC 16:0	Lipids	LPC	12095000	7124500	2257500	11589000	5825800	3390800	4533500	2554000	2750700	15890000	11483000	12342000	10304000	9125600	7672800	--	--
Lmhp008688	500.28	359.26	499.27	C25H42NO7P	[M+H]+	LysoPE 20:5	Lipids	LPE	219600	299790	245620	168150	392000	292260	110510	141950	87912	217360	256040	183790	228100	217100	213360	--	--
Lmhp009349	502.29	361.27	501.286	C25H44NO7P	[M+H]+	LysoPE 20:4(2n isomer)*	Lipids	LPE	635310	302450	342400	460860	550850	420290	120530	127540	116200	202890	175890	112650	322960	321290	310210	--	--
Lmhp009802	504.31	363.29	503.301	C25H46NO7P	[M+H]+	LysoPE 20:3(2n isomer)*	Lipids	LPE	742570	167980	332800	408080	371710	367370	26005	23021	29133	54441	45010	39522	209080	226910	198520	--	--
Lmhp008718	506.32	184.07	505.317	C25H48NO7P	[M+H]+	LysoPC 17:2	Lipids	LPC	491700	283860	184570	359580	470980	274570	39822	34481	83460	130870	109060	195870	188760	199900	190230	--	--
Lmhp010757	506.32	365.31	505.317	C25H48NO7P	[M+H]+	LysoPE 20:2	Lipids	LPE	340200	97197	158510	210600	178420	181680	33901	47057	31812	57258	87125	70222	131710	126990	131350	--	--
Lmhp010514	506.32	365.31	505.317	C25H48NO7P	[M+H]+	LysoPE 20:2(2n isomer)	Lipids	LPE	326550	85470	161590	191530	188810	187860	37587	51117	38456	61583	90563	67709	121170	123070	124370	--	--
Lmhp009590	508.34	184.07	507.332	C25H50NO7P	[M+H]+	LysoPC 17:1	Lipids	LPC	28289000	10918000	10264000	17623000	17640000	11606000	4019900	4982000	3795600	6683100	5233300	5173000	10619000	10261000	10104000	--	--
pmb2406	510.36	184.07	509.348	C25H52NO7P	[M+H]+	LysoPC 17:0*	Lipids	LPC	293900	355170	123460	241150	569100	259100	27940	51336	117730	182330	190360	309050	245630	242370	188930	--	--
Lmhp010515	510.36	184.07	509.348	C25H52NO7P	[M+H]+	LysoPC 17:0(2n isomer)*	Lipids	LPC	3237900	1344800	726370	1640600	1592200	829340	205340	202410	344000	507700	481460	853130	810090	804530	706200	--	--
Lmhp009526	515.32	261.22	514.314	C27H46O9	[M+H]+	2-γ-Linolenoyl-glycerol-glucoside*	Lipids	Glycerol ester	324720	293370	236970	195370	194030	189040	47002	36218	299210	107190	80124	158070	153070	149660	155100	--	--
Hmqp006235	516.3	184.07	515.297	C21H46N3O9P	[M+H]+	LysoPC 18:4	Lipids	LPC	294370	138680	141270	184160	251070	120800	33676	36094	42852	57102	29400	32078	107740	117780	106240	--	--
Lmhp010573	517.34	263.24	516.33	C27H48O9	[M+H]+	1-Linoleoylglycerol-glucoside*	Lipids	Glycerol ester	148090	146510	115100	129660	74285	80269	8981.2	11129	59855	28649	27748	65541	80625	83159	78490	--	--
Lmhp010334	517.34	263.24	516.33	C27H48O9	[M+H]+	2-Linoleoylglycerol-glucoside*	Lipids	Glycerol ester	159720	157220	121210	130620	85338	87285	10373	13640	51385	34487	35258	72282	93112	94646	81241	--	--
pmb0865	518.32	184.07	517.317	C26H48NO7P	[M+H]+	LysoPC 18:3(2n isomer)	Lipids	LPC	26469000	29077000	14967000	15654000	19024000	12133000	2406400	2032600	7758400	10815000	10476000	17362000	12516000	11476000	11386000	--	--
pmp001251	520.34	184.07	519.332	C26H50NO7P	[M+H]+	LysoPC 18:2(isomer)	Lipids	LPC	6824400	5357000	2848400	3965700	4670500	3086400	230270	193940	878050	1211200	1373200	2720300	2617300	2447200	2295100	--	--
Lmhp010190	522.36	184.07	521.348	C26H52NO7P	[M+H]+	LysoPC 18:1(2n isomer)	Lipids	LPC	46785000	54998000	31998000	30689000	55566000	38759000	7258700	10869000	13321000	15079000	23873000	34653000	29303000	28123000	27096000	--	--
pmd0136	524.37	184.07	523.364	C26H54NO7P	[M+H]+	LysoPC 18:0(2n isomer)	Lipids	LPC	2102200	1914200	859400	1371400	2210200	1174700	102220	122770	351000	572380	492620	1103900	1108000	1054400	845690	--	--
Lmhp010041	528.31	387.29	527.301	C27H46NO7P	[M+H]+	LysoPE 22:5	Lipids	LPE	550200	108610	247540	434330	211350	268650	49455	6784.3	5285.2	47153	6159.2	6694.3	169010	144350	147920	--	--
Lmhp007598	534.36	184.07	533.348	C27H52NO7P	[M+H]+	LysoPC 19:2(2n isomer)*	Lipids	LPC	154120	111600	126860	107030	130610	105070	73898	85096	99723	102120	100850	97721	120720	93237	89602	--	--
Lmhp010908	536.37	184.07	535.364	C27H54NO7P	[M+H]+	LysoPC 19:1	Lipids	LPC	12446000	10544000	3401200	16743000	15414000	8253600	135570	151000	779970	4494500	3656300	7036100	4903900	4492400	4399800	--	--
Lmhp008742	542.32	184.07	541.317	C28H48NO7P	[M+H]+	LysoPC 20:5	Lipids	LPC	1284900	1513000	1017000	749110	1895600	1059400	398050	630650	494350	797820	991110	827040	904850	910590	906030	--	--
pmc0960	544.34	184.07	543.332	C28H50NO7P	[M+H]+	LysoPC 20:4	Lipids	LPC	4742000	2163300	1596900	2075100	3552200	1960700	819080	1439800	1823600	1405600	1547100	1391300	2107800	1948300	1970800	--	--
Lmhp009890	546.36	184.07	545.348	C28H52NO7P	[M+H]+	LysoPC 20:3	Lipids	LPC	6123600	2431100	2568200	2757700	3972800	2445600	145090	131420	243260	314980	236130	210140	1525600	1474300	1406000	--	--
pmd0147	548.37	184.07	547.364	C28H54NO7P	[M+H]+	LysoPC 20:2*	Lipids	LPC	1092000	392110	357570	480130	754310	471820	64212	105980	94634	99621	145260	116720	261050	244030	253010	--	--
pmd0146	548.37	184.07	547.364	C28H54NO7P	[M+H]+	LysoPC 20:2(2n isomer)*	Lipids	LPC	1016900	363140	342570	483220	774760	456840	59042	97556	91255	93220	124720	123530	253360	243110	245970	--	--
Lmhp011549	550.39	184.07	549.379	C28H56NO7P	[M+H]+	LysoPC 20:1	Lipids	LPC	937380	539850	236780	534800	569300	268200	97664	86136	66949	151650	218300	213810	296910	291280	259000	--	--
Lmhp009368	568.34	184.07	567.332	C30H50NO7P	[M+H]+	LysoPC 22:6	Lipids	LPC	267610	228210	217630	170210	287220	216310	16820	4096.5	8483.2	17061	6556.2	17116	128350	132410	113010	--	--
Lmhp009682	570.36	184.07	569.348	C30H52NO7P	[M+H]+	LysoPC 22:5(2n isomer)	Lipids	LPC	266670	167230	104590	104340	274040	107510	10407	16007	15073	18664	18289	18324	83432	93498	87165	--	--
Lmhp010099	570.36	184.07	569.348	C30H52NO7P	[M+H]+	LysoPC 22:5	Lipids	LPC	1672000	601460	864710	979700	924090	790890	98164	18927	21907	109880	18706	51969	460230	451300	428610	--	--
Lmhp010394	572.37	184.07	571.364	C30H54NO7P	[M+H]+	LysoPC 22:4	Lipids	LPC	636760	274430	180860	289240	415900	211060	22202	22436	13752	27127	13723	12409	154350	154800	156340	--	--
pmp001276	677.37	677.37	676.367	C33H56O14	[M+H]+	2,3-Dihydroxypropyl-9,12,15-octadecatrienoate-hexose-hexose	Lipids	Free fatty acids	4623600	3488800	1993700	4212800	2050500	1604200	2470900	1420100	1525000	2779100	1825600	2281300	3088900	3113300	2743100	--	--
Lmhp008513	677.37	261.22	676.367	C33H56O14	[M+H]+	2-γ-Linolenoyl-glycerol-diglucoside*	Lipids	Glycerol ester	229830	349720	374320	151750	238130	285200	12926	19014	136730	75745	50577	142640	215300	176470	155230	--	--
Lmhp008744	677.37	261.22	676.367	C33H56O14	[M+H]+	1-α-Linolenoyl-glycerol-diglucoside*	Lipids	Glycerol ester	249770	394760	282180	161540	267860	233810	9775.7	15156	131010	69202	47585	142820	123650	188730	121150	--	--
pmp001271	679.39	263.24	678.383	C33H58O14	[M+H]+	2,3-Dihydroxypropyl-9,12-octadecadienoate-hexose-hexose*	Lipids	Free fatty acids	376370	685710	754580	363300	497570	456710	10055	17404	156500	88419	82794	303400	345880	210770	260510	--	--
Lmhp009384	679.39	263.24	678.383	C33H58O14	[M+H]+	1-Linoleoylglycerol-diglucoside*	Lipids	Glycerol ester	524770	703930	595020	442280	498200	502450	14421	20088	157890	108930	92699	190760	241550	258930	247780	--	--
pme3200	74	57	73.064	C2H7N3	[M+H]+	1-methylguanidine	Nucleotides and derivatives	Nucleotides and derivatives	39421	29851	35438	41475	42283	47529	35656	43880	54484	61731	70853	71050	45019	42630	47158	--	--
mws0255	112.05	95	111.043	C4H5N3O	[M+H]+	Cytosine	Nucleotides and derivatives	Nucleotides and derivatives	1649200	990090	1217300	949420	498950	647000	1320500	1314100	2203100	1273700	1535200	1571000	1244400	1182300	1336700	C00380	ko00240,ko01100
pme0257	111.02	80	112.027	C4H4N2O2	[M-H]-	Uracil	Nucleotides and derivatives	Nucleotides and derivatives	182910	129590	149470	163880	172100	142650	194960	152360	149240	210230	166580	187580	169500	163860	163340	C00106	ko00240,ko00410,ko00770,ko01100
mws0572	126.07	109	125.059	C5H7N3O	[M+H]+	5-Methylcytosine	Nucleotides and derivatives	Nucleotides and derivatives	81981	54089	42630	41284	9	20005	67567	52814	96546	32853	49924	53460	52687	62332	58008	C02376	ko00240,ko01100
mws0251	127.05	110	126.043	C5H6N2O2	[M+H]+	Thymine	Nucleotides and derivatives	Nucleotides and derivatives	49221	89160	47596	37133	53440	33957	117310	160000	106750	44991	88113	161910	73947	73403	89407	C00178	ko00240,ko01100
pme0040	136.06	119	135.054	C5H5N5	[M+H]+	Adenine	Nucleotides and derivatives	Nucleotides and derivatives	22273000	18093000	19608000	24333000	19061000	16940000	18108000	20194000	22871000	17550000	14838000	17406000	21013000	20014000	20096000	C00147	ko00230,ko00908,ko01100
pme0033	137.05	119	136.039	C5H4N4O	[M+H]+	Hypoxanthine	Nucleotides and derivatives	Nucleotides and derivatives	897890	968070	1374100	1321900	1124000	1559400	1321300	1893400	1829700	1520400	1973600	1656600	1630100	1564800	1537400	C00262	ko00230,ko01100
pme0183	152.06	135	151.049	C5H5N5O	[M+H]+	2-Hydroxy-6-aminopurine	Nucleotides and derivatives	Nucleotides and derivatives	839860	421460	462660	792520	490880	338550	524380	797010	859500	671250	749990	864620	638710	704000	656840	--	--
pme1109	152.06	135	151.049	C5H5N5O	[M+H]+	Guanine	Nucleotides and derivatives	Nucleotides and derivatives	6141800	4547200	4117100	7524400	4065600	4210800	5033500	6328400	8055000	6045400	6944200	8279200	6514000	6495100	6107800	C00242	ko00230,ko01100
pme3968	166.07	149.05	165.065	C6H7N5O	[M+H]+	7-Methylguanine	Nucleotides and derivatives	Nucleotides and derivatives	62034	46306	41874	29903	20778	17760	51769	53943	52633	42322	40614	62582	44089	45670	51845	C02242	--
pmc0274	167.1	121.1	166.031	C6H6N4S	[M+H]+	6-Methylmercaptopurine	Nucleotides and derivatives	Nucleotides and derivatives	27743000	19587000	21668000	13796000	10334000	11941000	24347000	20113000	25231000	14693000	14980000	13504000	19314000	19818000	19075000	C16614	--
pmb2507	213.1	97	214.024	C5H11O7P	[M-H]-	2-Deoxyribose 1-phosphate	Nucleotides and derivatives	Nucleotides and derivatives	654360	382750	1455900	490760	328230	1066000	304440	341790	549430	722090	765040	830520	766640	781330	810660	C00672	ko00030,ko00240,ko01100
pme1194	228.1	112	227.091	C9H13N3O4	[M+H]+	Deoxycytidine	Nucleotides and derivatives	Nucleotides and derivatives	1950000	1099700	982360	736550	315330	357910	1442200	1406400	2540900	894570	1880200	1590800	1386400	1462100	1321700	C00881	ko00240,ko01100,ko02010
pme0264	243.1	127	242.09	C10H14N2O5	[M+H]+	Thymidine	Nucleotides and derivatives	Nucleotides and derivatives	1425000	1092400	1054300	743770	552480	547680	1434000	1508000	1660500	1030600	1462200	1187700	1399400	1267100	1308900	C00214	ko00240,ko01100
pme3732	244.09	112	243.086	C9H13N3O5	[M+H]+	Cytidine	Nucleotides and derivatives	Nucleotides and derivatives	19356000	10964000	15828000	12567000	6180600	7934700	16398000	13976000	27658000	15855000	17670000	18170000	15092000	15607000	16802000	C00475	ko00240,ko01100,ko02010
mws0248	243.06	110	244.07	C9H12N2O6	[M-H]-	Uridine*	Nucleotides and derivatives	Nucleotides and derivatives	6889900	5683700	6405500	6470600	4625600	4358200	7436400	6595900	7355900	7519400	6051700	6238500	6897600	6395800	6673400	C00299	ko00240,ko01100,ko02010
mws0976	243.06	153	244.07	C9H12N2O6	[M-H]-	β-Pseudouridine*	Nucleotides and derivatives	Nucleotides and derivatives	265250	322730	390730	355460	308800	296380	512770	453080	433950	460110	331290	318970	405960	362350	396670	C02067	ko00240,ko01100
pme3961	252.11	136	251.102	C10H13N5O3	[M+H]+	Deoxyadenosine*	Nucleotides and derivatives	Nucleotides and derivatives	9553500	6845000	6129900	5006700	3228400	2930600	12081000	12026000	14612000	8359600	13836000	12219000	9879800	9297500	9653100	C00559	ko00230,ko01100,ko02010
mws1715	252.11	69	251.102	C10H13N5O3	[M+H]+	Cordycepin*	Nucleotides and derivatives	Nucleotides and derivatives	112430	79631	80286	58804	48809	46972	142000	128770	167350	103550	173950	164170	110350	115940	102190	C08431	--
pme1187	257.08	124	258.085	C10H14N2O6	[M-H]-	5-Methyluridine	Nucleotides and derivatives	Nucleotides and derivatives	27402	20614	25000	20203	8326.5	10939	27598	27326	48450	28626	29170	22061	21231	25344	23247	--	--
pme0230	268.1	136.06	267.097	C10H13N5O4	[M+H]+	Adenosine*	Nucleotides and derivatives	Nucleotides and derivatives	6381100	4846300	4831700	3272900	2152100	2367000	7583400	6238100	7193200	6894700	7085800	6149200	5965200	5698500	5707000	C00212	ko00230,ko01100,ko02010
pme1184	268.1	152	267.097	C10H13N5O4	[M+H]+	Deoxyguanosine*	Nucleotides and derivatives	Nucleotides and derivatives	6154600	3452100	3555800	2479000	1373200	1428900	5081600	5208900	7207200	2946700	6262300	5222000	4504800	4515000	4401200	C00330	ko00230,ko01100,ko02010
mws1060	267.07	135	268.081	C10H12N4O5	[M-H]-	9-(Arabinofuranosyl)hypoxanthine	Nucleotides and derivatives	Nucleotides and derivatives	3485900	4768800	8986800	2392300	2832900	5250900	4930500	5507500	6834200	5982200	5761100	5236900	5623400	5113900	5542900	--	--
pme1178	284.1	152	283.092	C10H13N5O5	[M+H]+	Guanosine	Nucleotides and derivatives	Nucleotides and derivatives	13282000	9919600	10252000	7233600	4523200	4881100	11519000	10122000	15237000	7287200	8798300	9175900	9276500	9167200	10637000	C00387	ko00230,ko01100,ko02010
mws0668	283.07	151	284.076	C10H12N4O6	[M-H]-	Xanthosine	Nucleotides and derivatives	Nucleotides and derivatives	784720	575430	512410	327620	252360	264900	627200	481900	487370	361930	304640	238180	462940	445880	425040	C01762	ko00230,ko00232,ko01100,ko01110,ko02010
Lmqp000329	296.07	104.11	295.056	C8H14N3O7P	[M+H]+	5-Aminoimidazole ribonucleotide	Nucleotides and derivatives	Nucleotides and derivatives	12898	11760	44054	28612	37250	94066	36773	56409	19305	43812	51202	43480	45453	50279	43821	--	--
pme1474	298.1	136	297.09	C11H15N5O3S	[M+H]+	5'-Deoxy-5'-(methylthio)adenosine	Nucleotides and derivatives	Nucleotides and derivatives	19216000	12768000	15914000	7122200	8106900	9308200	29808000	23901000	25819000	23330000	19269000	19454000	18787000	19734000	18840000	C00170	ko00270,ko00908,ko01100
pmb0197	298.1	166.3	297.107	C11H15N5O5	[M+H]+	N7-Methylguanosine	Nucleotides and derivatives	Nucleotides and derivatives	1228400	808870	790640	748270	252120	291290	1210600	1054000	1777700	742370	853240	868000	1006900	1012100	905720	C20674	--
pme3967	312.13	180	311.123	C12H17N5O5	[M+H]+	2-(Dimethylamino)guanosine	Nucleotides and derivatives	Nucleotides and derivatives	1127800	805280	826780	1094700	475070	444170	1465100	1271800	1920200	1054300	1191400	1395800	1128800	1157900	1163000	--	--
pme3174	324.06	112	323.052	C9H14N3O8P	[M+H]+	Cytidine 5'-monophosphate(Cytidylic acid)	Nucleotides and derivatives	Nucleotides and derivatives	366540	213000	242930	480580	177430	274210	49794	100840	148610	291770	242920	281850	245770	244390	195300	C00055	ko00240,ko01100
pme3188	323.03	211	324.036	C9H13N2O9P	[M-H]-	Uridine 5'-monophosphate	Nucleotides and derivatives	Nucleotides and derivatives	1386500	972750	1065600	553300	272830	330860	260500	332300	580020	140790	250570	275850	589400	669890	569780	C00105	ko00240,ko01100
mws0884	328.05	134.2	329.053	C10H12N5O6P	[M-H]-	Cyclic AMP	Nucleotides and derivatives	Nucleotides and derivatives	603240	524140	492240	376400	251630	260310	776690	653080	814750	695250	727590	625150	602790	597740	604330	C00575	ko00230,ko01100
pme3184	332.08	136	331.068	C10H14N5O6P	[M+H]+	2'-Deoxyadenosine-5'-monophosphate	Nucleotides and derivatives	Nucleotides and derivatives	122210	102490	103990	121330	111030	101130	151390	139970	103790	170280	150280	160310	185430	153390	162170	C00360	ko00230,ko01100
pmc0066	333.05	137.05	332.052	C10H13N4O7P	[M+H]+	2'-Deoxyinosine-5'-monophosphate	Nucleotides and derivatives	Nucleotides and derivatives	9	5139.1	20408	39339	40823	125830	30977	24605	38122	58397	80319	103110	35912	32240	41410	C06196	ko00230
mws0609	344.04	150	345.047	C10H12N5O7P	[M-H]-	Guanosine 3',5'-cyclic monophosphate	Nucleotides and derivatives	Nucleotides and derivatives	2514200	706320	621290	1108100	310780	343790	316250	291500	349310	909690	1288000	915220	976860	827760	818870	C00942	ko00230,ko01100
pmb0981	348.07	136	347.063	C10H14N5O7P	[M+H]+	Adenosine 5'-monophosphate	Nucleotides and derivatives	Nucleotides and derivatives	909130	812080	794260	177070	229710	182270	281430	168980	306800	125820	219960	129730	339470	335570	360770	C00020	ko00230,ko00908,ko01100,ko01110
pmb0998	364.07	152.1	363.058	C10H14N5O8P	[M+H]+	Guanosine 5'-monophosphate	Nucleotides and derivatives	Nucleotides and derivatives	1066700	347070	517030	689710	180690	406720	41885	9	93214	561990	573810	487770	485870	397380	363840	C00144	ko00230,ko01100
pmb0964	366.2	204.1	365.17	C16H23N5O5	[M+H]+	Isopentenyladenine-7-N-glucoside	Nucleotides and derivatives	Nucleotides and derivatives	212290	295980	200990	341990	273980	214910	958330	716350	735550	1259900	1170900	1052200	736000	696180	902870	--	--
pme3337	384.12	252	383.108	C14H17N5O8	[M+H]+	N6-Succinyl Adenosine	Nucleotides and derivatives	Nucleotides and derivatives	1249900	809680	3982000	1127100	909920	2908600	1817200	1601700	1708300	2004900	1628400	1493000	1879200	1866400	1798800	--	--
pme2117	426	159	427.029	C10H15N5O10P2	[M-H]-	Adenosine 5'-diphosphate	Nucleotides and derivatives	Nucleotides and derivatives	27759	26326	20419	18776	53981	46530	7606.8	10764	10677	21096	12352	14284	25860	19216	20489	C00008	ko00190,ko00195,ko00230,ko00908,ko01100,ko01110
Zmfn000481	535.04	323.03	536.044	C14H22N2O16P2	[M-H]-	Uridine-5'-Diphosphate-D-Xylose	Nucleotides and derivatives	Nucleotides and derivatives	162340	238820	265160	81226	277340	287700	158430	127610	134340	166100	112190	112800	217080	165770	164320	C00190	ko00520,ko00908,ko01100
pmb0530	664.12	136.2	663.109	C21H27N7O14P2	[M+H]+	Nicotinic acid adenine dinucleotide	Nucleotides and derivatives	Nucleotides and derivatives	54493	43557	11429	37937	53438	23859	78106	60609	5317.1	64646	92607	24638	62543	60625	61964	C00003	ko00190,ko00730,ko00760,ko01100
Lmqp000873	101.02	55.02	100.018	C4H4O3	[M+H]+	Succinic anhydride	Organic acids	Organic acids	194190	179190	184850	189270	160910	138260	203830	199870	195540	215430	227720	187500	208310	192980	196960	--	--
pme3011	104.07	68.8	103.063	C4H9NO2	[M+H]+	γ-Aminobutyric acid*	Organic acids	Organic acids	2538900	2719200	3494100	1365400	905580	850100	4914100	4326700	4698400	2068000	2131700	1359800	3211500	2794600	2543100	C00334	ko00250,ko00330,ko00410,ko00650,ko00760,ko01100
mws0576	103.04	59.1	104.047	C4H8O3	[M-H]-	3-Hydroxybutyrate*	Organic acids	Organic acids	7085000	7083700	10358000	7076700	8408200	12065000	20814000	16035000	21996000	19432000	15006000	13537000	15088000	15329000	14307000	--	--
pme2049	103.04	57	104.047	C4H8O3	[M-H]-	2-Hydroxybutanoic acid*	Organic acids	Organic acids	23577	24464	30740	29122	38360	42868	71850	61884	80867	64617	55010	49918	65436	48251	44424	C05984	ko00640
pme1975	103	59	104.06	C3H4O4	[M-H]-	Malonic acid	Organic acids	Organic acids	7441900	7111400	10771000	7125600	8693100	12506000	21841000	15683000	22024000	19297000	15314000	14271000	14872000	15010000	14582000	C00383	ko00061,ko00240,ko00410,ko01100,ko01212
mws0177	111.01	67	112.016	C5H4O3	[M-H]-	2-Furanoic acid	Organic acids	Organic acids	642550	568500	426370	612170	639470	356080	878710	673530	755070	689320	473640	778920	655390	623420	670850	C01546	ko01100
pme0275	115.04	97	115.04	C5H7O3-	[M]-	4-Oxopentanoate	Organic acids	Organic acids	10179	8395.7	11099	11757	11338	15160	14185	11514	11291	10118	6147	8632.1	11993	12241	12006	--	--
mws0823	115.04	71	116.047	C5H8O3	[M-H]-	3-Methyl-2-Oxobutanoic acid	Organic acids	Organic acids	39393	59005	44115	75510	63051	86173	70927	63836	70686	65956	54640	65164	64352	74257	69028	C00141	ko00280,ko00290,ko00770,ko00966,ko01100,ko01110,ko01210,ko01230
mws0470	117.02	73	118.027	C4H6O4	[M-H]-	Methylmalonic acid*	Organic acids	Organic acids	15581000	12166000	14096000	13633000	10891000	9725900	15998000	15571000	17594000	19449000	17644000	15604000	15738000	15175000	16138000	C02170	ko00240,ko00280,ko00640,ko01100
mws0192	117.02	73	118.027	C4H6O4	[M-H]-	Succinic acid*	Organic acids	Organic acids	15472000	13116000	14401000	13621000	10702000	9909700	16957000	14716000	17623000	19869000	17562000	16929000	15832000	15859000	15972000	C00042	ko00020,ko00190,ko00250,ko00310,ko00350,ko00360,ko00620,ko00630,ko00640,ko00650,ko00760,ko00920,ko01100,ko01110,ko01200
mws0147	117.06	59	118.063	C5H10O3	[M-H]-	3-Hydroxy-3-methyl butyric acid	Organic acids	Organic acids	618210	302370	346930	299490	154460	219110	940680	716200	615340	488570	459320	361960	469910	491370	475200	--	--
pme3096	118	74	119.022	C3H5NO4	[M-H]-	Aminomalonic acid	Organic acids	Organic acids	599110	469460	565240	523980	425010	396240	680960	584060	663130	736110	673860	617410	621580	583860	575450	C00872	--
mws0671	120.07	74.1	119.058	C4H9NO3	[M+H]+	L-Homoserine	Organic acids	Organic acids	1744500	1764600	1812200	1761100	1336100	1548500	2221500	3020500	3819200	4158900	3178200	2846700	2295900	2528300	2521500	C00263	ko00260,ko00270,ko00300,ko00920,ko01100,ko01110,ko01230
pme1216	122.03	78	123.032	C6H5NO2	[M-H]-	2-Picolinic acid*	Organic acids	Organic acids	4070500	3715100	4627700	4798200	3363100	4445400	8170200	7182000	7114400	7830500	7474600	6722200	6084000	5705700	6237700	C10164	ko00380,ko01100
mws0425	129.02	85	130.027	C5H6O4	[M-H]-	Citraconic acid	Organic acids	Organic acids	365100	164210	77126	364580	192860	248020	171400	91055	379940	506400	302290	458120	221400	198200	212920	C02226	ko00290,ko00660,ko01100,ko01210
pme0274	132.1	69	131.095	C6H13NO2	[M+H]+	6-Aminocaproic acid*	Organic acids	Organic acids	35033000	33813000	28260000	21164000	17126000	21680000	35365000	31082000	45522000	26874000	27898000	22954000	32893000	35527000	31299000	C02378	ko01100
mws0473	131.03	87	132.042	C5H8O4	[M-H]-	2-Methylsuccinic acid	Organic acids	Organic acids	524750	411850	211360	1180800	250960	499660	1149600	249690	320120	749460	420460	497660	554580	559190	556120	--	--
Lmmn000806	131.03	87.05	132.042	C5H8O4	[M-H]-	Dimethylmalonic acid	Organic acids	Organic acids	44708	33995	20316	116720	22457	53740	117390	26526	35646	74644	42653	50347	53535	51504	56291	--	--
pme0243	131.04	87	132.042	C5H8O4	[M-H]-	Glutaric acid	Organic acids	Organic acids	445650	168710	220520	761160	364230	507440	411180	383540	370580	1290900	1256000	1587000	712540	682100	723090	C00489	ko00071,ko00310,ko01100
mws0972	131.07	85	132.079	C6H12O3	[M-H]-	6-Hydroxyhexanoic acid	Organic acids	Organic acids	175970	203080	183040	143800	172030	196000	192960	162220	143690	142630	125440	108490	165620	146260	160140	C06103	--
mws0341	131.07	85	132.079	C6H12O3	[M-H]-	(S)-(-)-2-Hydroxyisocaproic acid	Organic acids	Organic acids	628710	1846800	1267300	262220	237330	398900	3187800	2789200	2821200	1231500	1606600	1212900	1614400	1507600	1472200	--	--
mws1709	133.01	71	134.022	C4H6O5	[M-H]-	Malic acid	Organic acids	Organic acids	9154700	6728300	8516900	9902700	10459000	10218000	10520000	9590900	19456000	29091000	25607000	29729000	12205000	12169000	11636000	--	--
Lmbn002862	137.02	93.03	138.032	C7H6O3	[M-H]-	3-Hydroxybenzoic Acid	Organic acids	Organic acids	32851000	24907000	34447000	5064600	3416700	4903700	24378000	22042000	33081000	24107000	12536000	14063000	21420000	20427000	20125000	C00587	ko00400
pme3207	141.02	59	142.027	C6H6O4	[M-H]-	Trans,trans-Muconic acid	Organic acids	Organic acids	3497500	3522100	3771600	3585900	3485600	3858300	4216000	4544000	3734000	3679400	3844700	3803100	4141700	4115400	3883800	--	--
pme0295	146.08	86	145.074	C6H11NO3	[M+H]+	4-Acetamidobutyric acid	Organic acids	Organic acids	136530	115280	192030	102680	95792	138130	184190	158300	196890	199410	247980	212430	138320	159390	179860	C02946	ko00330,ko01100
mws0567	146.09	87	145.085	C5H11N3O2	[M+H]+	4-Guanidinobutyric acid	Organic acids	Organic acids	1595700	1387800	3588700	1970400	2240400	4188600	2993400	2304500	3070000	5173100	4723500	4780000	3082100	3237500	3463900	C01035	ko00330,ko01100
pme2380	145.01	101	146.022	C5H6O5	[M-H]-	α-Ketoglutaric acid	Organic acids	Organic acids	820660	641350	821900	951200	945240	814650	941520	794810	813670	1118700	1380200	1410900	1110500	1067800	886690	C00026	ko00020,ko00040,ko00053,ko00220,ko00250,ko00300,ko00310,ko00340,ko00430,ko00630,ko00650,ko00660,ko01100,ko01110,ko01200,ko01210,ko01230
mws0924	145.05	101	146.058	C6H10O4	[M-H]-	2-Methylglutaric acid*	Organic acids	Organic acids	425680	120170	104770	169150	114970	116330	165320	135360	155870	214600	174710	145810	164960	173350	189290	--	--
Lmbn001609	145.05	83.05	146.058	C6H10O4	[M-H]-	(S)-2-Acetyl-2-Hydroxybutanoic Acid	Organic acids	Organic acids	79196	31018	30817	43711	30777	31058	42104	30856	37190	52447	43984	37663	49303	42522	36616	C06006	ko00290,ko01100,ko01110,ko01210,ko01230
mws0208	145.05	101	146.058	C6H10O4	[M-H]-	Adipic Acid*	Organic acids	Organic acids	448640	97148	103450	184030	84770	118670	186600	139590	143540	208950	192920	129950	155960	164750	164870	C06104	ko01100
Zmyn000247	147.03	57.03	148.037	C5H8O5	[M-H]-	(S)-2-Hydroxyglutaric Acid	Organic acids	Organic acids	85836	80183	99567	127760	109890	87339	191440	169820	187960	270080	217860	194450	192150	149930	201870	C03196	ko00310,ko01100
mws0639	153.02	109	154.027	C7H6O4	[M-H]-	2,3-Dihydroxybenzoic Acid*	Organic acids	Organic acids	10489000	5919500	8808200	1787100	1457400	1809200	10797000	6015000	11731000	8528100	4820500	6634900	7882400	6792000	5897200	C00196	ko01110
pmb3099	153.03	125	154.039	C4H11O4P	[M-H]-	Diethyl phosphate	Organic acids	Organic acids	310230	230720	295190	328930	519380	573970	301410	315080	318670	185740	296420	255970	419880	398180	404400	C06608	--
Lmbn001467	158.08	116.07	159.09	C7H13NO3	[M-H]-	5-Acetamidopentanoic Acid	Organic acids	Organic acids	450520	168200	210120	169100	119940	126170	329480	277550	297510	296380	242590	203520	259440	278550	257690	C03087	ko00310,ko01100
Lmbn002072	159.07	97.07	160.074	C7H12O4	[M-H]-	2-Propylsuccinic acid	Organic acids	Organic acids	486850	366000	381060	290680	251830	182200	312960	277240	338410	397510	368010	263540	353200	366530	339380	C16657	--
Lmmn001643	163.04	119.05	164.047	C9H8O3	[M-H]-	2-Hydroxycinnamic acid*	Organic acids	Organic acids	36891000	43693000	36979000	39860000	37913000	32483000	44329000	43481000	44069000	43815000	42477000	45720000	43462000	40678000	43693000	--	--
pme0282	165.02	77	166.027	C8H6O4	[M-H]-	Phthalic acid*	Organic acids	Organic acids	30051	28966	37925	32971	43224	56481	25383	33644	35606	13547	23449	19705	36433	40706	31012	C01606	ko01100,ko02010
mws0344	165.04	75	166.048	C5H10O6	[M-H]-	D-Xylonic acid	Organic acids	Organic acids	1380800	1064300	1160700	1522600	1663300	1789800	1015700	1017400	1439200	2969400	2641500	2736000	1603500	1668600	1565800	C00502	ko00040,ko01100
Lmrn003000	165.06	103.06	166.063	C9H10O3	[M-H]-	2-Hydroxy-3-phenylpropanoic acid	Organic acids	Organic acids	32972	180230	30440	10948	9146.7	14031	61444	43566	43100	26387	30927	20412	41349	44270	35647	--	--
mws0851	143.11	143.11	166.097	C8H15NaO2	[M-Na]-	Sodium Valproate	Organic acids	Organic acids	7263900	5913600	5498700	6732100	8028800	10707000	7968700	7249900	8699900	6345400	6634200	7101400	7894900	7837100	7984200	--	--
Zmzn002460	171.04	127.05	172.052	C11H8O2	[M-H]-	1-Naphthoic acid	Organic acids	Organic acids	64839	42630	42070	56010	35372	38891	58159	47014	71438	34862	50900	39460	49736	50158	55610	C14091	--
Lmbn003524	171.1	99.08	172.11	C9H16O3	[M-H]-	9-Oxononanoic acid	Organic acids	Organic acids	1776600	1204400	1123100	488270	419560	295000	734060	485470	632260	384510	548950	379670	712320	722220	743840	C16322	ko00592,ko01110
mws0154	173.05	93	174.053	C7H10O5	[M-H]-	Shikimic acid	Organic acids	Organic acids	50702	124660	79296	98667	71538	57420	142150	87198	106870	192790	134280	155710	118750	119220	118840	C00493	ko00400,ko01100,ko01110,ko01230
Lmgn002555	173.08	59.01	174.089	C8H14O4	[M-H]-	2-Propylglutaric acid	Organic acids	Organic acids	2175900	1580700	1488700	944290	688200	665330	1204000	722970	1012900	1477000	766290	829730	1201900	1076600	1135600	C16658	--
mws0242	173.08	111	174.089	C8H14O4	[M-H]-	SubericAcid	Organic acids	Organic acids	210090	46225	49685	101040	63820	60354	60543	59183	51576	64108	94135	58918	84314	75767	79008	C08278	--
pmb3101	175.1	115	176.068	C7H12O5	[M-H]-	2-Isopropylmalate	Organic acids	Organic acids	37326	16379	43842	26595	18306	39290	19422	19888	29427	61727	39955	31072	31764	35959	27308	C02504	ko00290,ko00620,ko01100,ko01110,ko01210,ko01230
mws0237	187.1	125	188.105	C9H16O4	[M-H]-	Anchoic Acid*	Organic acids	Organic acids	1904700	1226700	1336600	764180	592810	602580	1270900	1032300	1292900	718960	939580	784160	1080300	1088800	1090600	C08261	--
mws0281	191.02	111.01	192.027	C6H8O7	[M-H]-	Citric Acid	Organic acids	Organic acids	2024300	1351000	900730	3886000	2392900	1773300	510830	407800	1579600	3302900	2030800	2782500	2494100	2042800	1945100	C00158	ko00020,ko00250,ko00630,ko01100,ko01110,ko01200,ko01210,ko01230
mws0277	191.06	85	192.063	C7H12O6	[M-H]-	Quinic Acid	Organic acids	Organic acids	3775700	3214900	3008400	7876200	5657800	4701700	2348100	2243200	3640700	6578600	3893300	5533900	5382400	4803300	4349500	C00296	ko00400,ko01100
mws1189	193.04	72.8	194.033	C6H10O7	[M-H]-	D-Galacturonic acid(Gal A)*	Organic acids	Organic acids	88157	47064	66113	28339	15060	17276	42282	31490	37530	42414	50044	35463	47592	43002	57783	C00333	ko00040,ko00053,ko00520,ko01100,ko02010
mws0612	195.07	121	196.074	C10H12O4	[M-H]-	3,4-Dimethoxyphenyl acetic acid	Organic acids	Organic acids	12526	17077	14427	5636.3	12358	15745	6126.1	10907	18942	15252	16215	23459	13173	14221	12680	--	--
pme1654	209.12	59.02	210.126	C12H18O3	[M-H]-	Jasmonic acid	Organic acids	Organic acids	578330	223920	262370	82982	75028	59115	309190	222130	268410	360600	474550	209850	276450	290250	279460	C08491	ko00592,ko01100,ko01110,ko04075
mws0474	229.14	211	230.152	C12H22O4	[M-H]-	Dodecanedioic aicd	Organic acids	Organic acids	3898.3	1031.5	954.92	1873.5	1371.8	1242.2	1661.9	1145.6	668.55	1045.7	1665.5	739.34	1777.3	2211.3	1658.6	C02678	--
Lmmn003323	271.23	225.22	272.235	C16H32O3	[M-H]-	2-Hydroxyhexadecanoic acid	Organic acids	Organic acids	3061600	1768400	2192900	6517300	5865500	7377000	10180000	6880200	9143600	20552000	18061000	20850000	11008000	10385000	10901000	--	--
pmb2657	289.1	97.1	290.123	C10H18N4O6	[M-H]-	Argininosuccinic acid	Organic acids	Organic acids	24571	31904	27027	17216	10508	15863	23408	26445	25150	12605	15771	11851	22053	23166	18065	C03406	ko00220,ko00250,ko01100,ko01110,ko01230
pme2074	322.4	129.7	323.21	C18H29NO4	[M-H]-	N-[(-)-Jasmonoyl]-(L)-Isoleucine (JA-L-Ile)	Organic acids	Organic acids	148700	42059	60389	17918	20707	24528	87970	53647	65987	178410	198220	69453	89829	89668	82580	C18699	ko04075
mws4052	102.06	56.05	101.048	C4H7NO2	[M+H]+	1-Aminocyclopropane-1-carboxylic acid	Others	Others	152240	169120	123260	214040	166680	140780	222270	273970	295260	414340	323340	367730	228230	213910	255660	C01234	ko00270,ko01100,ko01110
pme2433	106.09	88	105.079	C4H11NO2	[M+H]+	Diethanolamine	Others	Others	59905	44545	64772	49322	43419	67808	83467	74780	84173	84401	65818	70136	63019	61448	59572	C06772	ko00564
mws0601	110.02	66	111.032	C5H5NO2	[M-H]-	Pyrrole-2-carboxylic acid	Others	Others	207030	102910	168480	132520	99215	92381	176690	129480	149960	150940	101050	102940	130210	129220	125560	C05942	ko00330
pma0134	121.04	93.06	120.042	C4H8O4	[M+H]+	D-(-)-Threose	Others	Saccharides and Alcohols	90199	97695	99147	231590	195620	147310	177720	138140	176770	288520	258970	264710	182340	199240	187550	C06463	--
Lmbp000728	121.06	77.04	120.058	C8H8O	[M+H]+	(S)-2-Phenyloxirane	Others	Others	4786700	5551900	6027100	11553000	8504400	7690900	9458600	6127400	9871400	11831000	13393000	12907000	9801500	9301700	9675700	C20782	ko01100
Lmbn002644	119.05	93.03	120.058	C8H8O	[M-H]-	4-Methylbenzaldehyde	Others	Others	111910	147610	109900	122130	121370	86932	163160	156690	194330	148860	163940	209070	143800	139270	131480	C06758	ko01100
pmb0069	122	105	121.053	C7H7NO	[M+H]+	Benzamide	Others	Others	32379	54027	374570	34561	37662	186000	71924	74038	88401	71816	54967	59378	101020	105810	81565	C09815	--
mws0133	123.06	79.9	122.048	C6H6N2O	[M+H]+	Nicotinamide	Others	Vitamin	1718100	1982400	2083400	1468900	2801100	3011300	1794800	1561000	1771700	2134700	1711100	2658600	2053000	2181000	2194700	C00153	ko00760,ko01100
ML10179289	105.07	77.04	122.073	C8H10O	[M+H-H2O]+	2-Phenylethanol	Others	Others	30399	39261	328360	30795	23548	145890	67874	56059	79664	79097	37045	60007	89762	77746	74601	C05853	ko00360
pme0490	124.04	78	123.032	C6H5NO2	[M+H]+	Nicotinic acid*	Others	Vitamin	6486000	7098500	8030200	10293000	7477500	9924800	11835000	10543000	11156000	14049000	13994000	12653000	12216000	11133000	10762000	C00253	ko00760,ko00960,ko01100,ko01110
NK10264324	127.04	81.03	126.032	C6H6O3	[M+H]+	1,3,5-Benzenetriol	Others	Others	9	113220	31901	25423	49492	30860	32676	110820	69442	40566	40581	109060	61634	70432	55793	C02183	--
ML10181668	130.09	84.08	129.079	C6H11NO2	[M+H]+	CYCLOLEUCINE	Others	Others	662680	452120	545680	58114	68032	75667	1077400	1006800	1428200	576960	336390	317700	577110	578700	634200	C03969	--
ML10197929	130.09	88.04	131.069	C4H9N3O2	[M-H]-	Creatine	Others	Others	360530	177920	237070	95968	94970	109700	186690	225920	315280	157150	194850	146590	229010	204000	186280	C00300	ko00260,ko00330,ko01100
mws0889	135.03	75.01	136.037	C4H8O5	[M-H]-	Threonate	Others	Saccharides and Alcohols	134500	137410	132360	144340	97009	113290	123440	145380	157060	269200	215990	296050	158220	140790	180670	C01620	ko00053,ko01100
pma0948	138.09	121.1	137.084	C8H11NO	[M+H]+	Phenylethanolamine*	Others	Others	1535000	1719200	1824000	3462000	2718200	2161600	2903200	2009700	2850100	4132500	3569700	4273800	2842200	2953500	2907800	C02735	--
pma2987	142.1	124.09	141.09	C6H11N3O	[M+H]+	Histidinol	Others	Others	6767400	6698100	6745700	8865700	8657500	7079400	4292600	4010600	5061800	6074800	5042000	5284400	6316200	6230500	6528000	C00860	ko00340,ko01100,ko01110,ko01230
pmb0764	144.05	113.2	143.04	C6H9NOS	[M+H]+	4-Methyl-5-thiazoleethanol	Others	Others	1515800	1690900	1883200	1143100	1255300	1314100	2195900	2235500	2383100	1710700	1977600	1737100	1789500	1662300	1926400	C04294	ko00730,ko01100
mws1499	149.05	59.01	150.053	C5H10O5	[M-H]-	D-(-)-Arabinose	Others	Saccharides and Alcohols	58529	30630	35197	39979	38383	41881	31768	33095	41439	50520	17933	42762	51564	43905	47601	C00216	--
Zmjn001813	159.07	97.06	160.074	C7H12O4	[M-H]-	Pimelic acid	Others	Others	412190	327740	344000	282010	232420	167330	278180	224810	311440	352130	320820	288110	344310	306470	329170	C02656	ko00780,ko01100
NK10246260	162.06	116.05	161.048	C9H7NO2	[M+H]+	Quinoline-2,4-diol	Others	Others	1122100	925900	691370	762180	842830	423270	1064400	775010	891120	625280	457280	356580	768490	698170	735250	C16716	--
NK10253223	168.06	94.06	167.058	C8H9NO3	[M+H]+	2-Amino-3-methoxybenzoic acid*	Others	Others	946110	808340	827350	798860	658280	633740	1201400	1023300	1361000	882710	947590	969380	1000400	992850	959850	C05831	ko00380
Zmjp00624	168.06	150.05	167.058	C8H9NO3	[M+H]+	Pyridoxal*	Others	Others	932840	791260	800670	790330	644450	588610	1255200	1047700	1421400	875950	879740	904460	983950	958450	955850	C00250	ko00750,ko01100
Hmbp001276	169.05	65.03	168.042	C8H8O4	[M+H]+	Gallacetophenone*	Others	Others	584400	500740	595640	394720	409920	224060	523780	678070	591480	596900	533370	483540	524890	473850	458160	--	--
Zmsp001834	169.05	65	168.042	C8H8O4	[M+H]+	2,6-Dimethoxy-1,4-benzoquinone*	Others	Others	2408800	2737600	2066400	1694900	2060300	1610900	1947200	2010600	1554100	982880	1434700	1093900	1908700	1817300	1842700	--	--
pme1383	170.08	134.1	169.074	C8H11NO3	[M+H]+	Pyridoxine	Others	Vitamin	7957600	5371100	5225600	3852600	2976900	2644300	7001300	6322700	5990200	5482700	4330900	5180500	5451400	5978900	5497800	C00314	ko00750,ko01100
Zmzn000078	168.99	78.96	169.998	C3H7O6P	[M-H]-	Dihydroxyacetone phosphate	Others	Saccharides and Alcohols	184390	206360	271290	210650	331710	275710	274350	362210	471790	226310	189810	193540	293690	275620	317300	C00111	ko00010,ko00040,ko00051,ko00052,ko00561,ko00562,ko00564,ko00640,ko00710,ko00760,ko01100,ko01110,ko01200,ko01230
ML10176345	171.03	109.03	172.037	C7H8O5	[M-H]-	3-Dehydroshikimic acid	Others	Others	66228	26764	100790	37544	32223	44647	64366	74758	52101	61188	99210	57766	59498	63319	51560	C02637	ko00400,ko01100,ko01110,ko01230
MA10078408	173.1	78.96	174.1	C7H14N2O3	[M-H]-	N-Alpha-Acetyl-Ornithine	Others	Others	36234	26529	50461	38202	47076	55321	15329	10340	19969	30111	29482	23003	34371	36507	36089	C00437	ko00220,ko01100,ko01110,ko01210,ko01230
pmb0774	177.1	160.3	176.095	C10H12N2O	[M+H]+	N-Hydroxy tryptamine*	Others	Others	29818000	57051000	113850000	24256000	38324000	65822000	100290000	69945000	86551000	70009000	36865000	61673000	72162000	64752000	63938000	C17203	ko00380,ko01100
pmb0786	180	162	179.079	C6H13NO5	[M+H]+	Glucosamine	Others	Saccharides and Alcohols	371570	377410	359640	489280	469510	452030	280090	291730	304230	352210	278390	341150	383440	355150	285870	C00329	ko00520,ko01100
mws4170	179.06	59.01	180.063	C6H12O6	[M-H]-	D-Glucose*	Others	Saccharides and Alcohols	1289300	1373700	1131200	1763600	1188900	1252100	1763900	1866600	1977600	3827800	2922700	3333300	2050500	2013200	1919200	C00031	ko00010,ko00030,ko00052,ko00500,ko00520,ko00901,ko01100,ko01110,ko02010,ko04933
pme0516	179.06	87	180.063	C6H12O6	[M-H]-	Inositol*	Others	Saccharides and Alcohols	466370	367680	335190	395990	360770	326580	425450	359190	349260	417560	401100	379290	397840	418790	346430	C00137	ko00052,ko00053,ko00562,ko01100,ko01110,ko02010,ko04070
mws0214	181.07	71	182.079	C6H14O6	[M-H]-	D-Sorbitol*	Others	Saccharides and Alcohols	10855	3777.2	64693	16175	14254	47277	9431.5	5761.1	4216.9	23707	11005	36470	21627	26436	22335	C00794	ko00051,ko00052,ko01100,ko02010
pme2596	184.06	148	183.053	C8H9NO4	[M+H]+	4-Pyridoxic acid	Others	Vitamin	1041700	720450	749510	792370	647430	609530	874660	612650	916510	735190	524910	712710	831690	742020	755620	C00847	ko00750,ko01100
MA10002917	183.01	109.02	184.012	C6H4N2O5	[M-H]-	2,4-Dinitrophenol	Others	Others	62773	67959	51188	46951	43841	59963	55326	41118	44479	33528	33499	44338	46794	54312	51617	C02496	--
Zmgn000447	184.98	78.96	185.993	C3H7O7P	[M-H]-	3-Phospho-D-glyceric acid	Others	Saccharides and Alcohols	1720200	2515000	4195000	2332000	3821900	5108400	10631000	10033000	6206300	11330000	6946600	4349900	5829700	5612700	6059200	C00197	ko00010,ko00030,ko00260,ko00270,ko00561,ko00630,ko00710,ko01100,ko01110,ko01200,ko01230
pmn001380	187.1	169.09	188.105	C9H16O4	[M-H]-	Eucommiol*	Others	Others	8215400	5392700	5627800	3316200	2653300	2456300	5032200	4460500	5394500	2936300	3948000	3171400	4599300	4642900	4578300	C17878	--
pme3705	193.04	73	194.043	C6H10O7	[M-H]-	D-Glucoronic acid*	Others	Saccharides and Alcohols	106700	54804	70143	27452	21960	14906	52861	35912	46773	40893	42501	44656	50798	47169	42412	C00191	ko00040,ko00053,ko00520,ko00562,ko01100
pme0534	195.05	74.9	196.058	C6H12O7	[M-H]-	Gluconic acid	Others	Saccharides and Alcohols	1143400	714050	1198600	1352300	1205500	1378900	1342500	1196500	2138600	2824400	1953200	2692500	1645400	1435700	1548600	C00257	ko00030,ko01100,ko01110,ko01200
Zmzn000079	199	78.96	200.009	C4H9O7P	[M-H]-	D-Erythrose-4-phosphate	Others	Saccharides and Alcohols	302020	141570	194200	151770	172870	169230	117870	112100	116620	201830	129470	100820	169660	145630	197000	C00279	ko00030,ko00400,ko00710,ko00750,ko00998,ko01100,ko01110,ko01200,ko01230
NK10251888	203.15	70.07	202.143	C8H18N4O2	[M+H]+	NG,NG-Dimethyl-L-arginine	Others	Others	961460	718640	808610	682560	461980	568930	936450	907630	1106100	910630	889100	879440	825490	908040	847000	C03626	--
Zmgn002106	206.08	58.03	207.09	C11H13NO3	[M-H]-	N-Acetyl-L-phenylalanine	Others	Others	214450	170550	197030	324690	263900	335130	240210	161010	215680	735330	469450	462140	311580	304450	339420	C03519	ko00360,ko01100
MA10107783	207.03	119.05	208.037	C10H8O5	[M-H]-	3-[(1-Carboxyvinyl)oxy]benzoic acid	Others	Others	93034	85641	89584	72631	73785	65475	110970	85770	100880	108850	89432	96385	97357	100740	91611	C20772	ko00130,ko01110
Zmyn000108	209.03	85.03	210.038	C6H10O8	[M-H]-	D-Saccharic acid	Others	Saccharides and Alcohols	313440	199670	209810	237800	193630	210130	262890	263760	235570	318010	270010	311920	237060	219880	224200	C00818	ko00053,ko01100
Zmpn00199	209.03	85.03	210.038	C6H10O8	[M-H]-	Mucic acid	Others	Others	277690	240400	233710	233300	211080	187200	199290	230480	205540	315590	267810	307740	256490	217120	248640	C00879	ko00053,ko01100
Hmcn000192	209.07	59.01	210.073	C7H14O7	[M-H]-	Sedoheptulose	Others	Saccharides and Alcohols	169590	88882	81740	138800	121860	126420	111990	124370	154000	202030	170380	183640	138030	138370	155310	C02076	ko00710,ko01100
mws1337	220.12	202.1	219.111	C9H17NO5	[M+H]+	D-Pantothenic Acid	Others	Vitamin	3159000	1949300	2217100	6675600	6237000	5068200	2702600	2163000	1973900	5749400	5936500	6163600	4443300	4555600	4626900	C00864	ko00410,ko00770,ko01100,ko01110
Hmyp002656	222.08	130.06	221.068	C11H11NO4	[M+H]+	Methyl dioxindole-3-acetate	Others	Others	143080	106230	100650	95476	77242	78289	94259	105730	69766	104250	117790	96595	92109	105950	121300	--	--
mws4174	222.1	138	221.09	C8H15NO6	[M+H]+	N-Acetyl-mannosamine	Others	Others	526220	471280	706150	554080	452340	524690	587440	550730	658270	671730	710410	724900	631650	556290	654210	--	--
pme2755	222	144	221.09	C8H15NO6	[M+H]+	N-Acetyl-D-glucosamine	Others	Saccharides and Alcohols	370180	362050	399020	438270	445450	356070	214860	202280	248680	326260	262570	264740	321500	332930	322020	C00140	ko00520,ko01100,ko02010
ML10174588	233.16	233.16	234.162	C15H22O2	[M-H]-	Confertifoline	Others	Others	2002700	1870100	1915700	2424000	2654700	4937100	2133200	2597800	2844100	1788100	1803700	2254900	2759900	2805000	3052800	C09376	--
pme2827	239	223	240.245	C16H32O	[M-H]-	Palmitaldehyde	Others	Others	9910600	10862000	10877000	10193000	12401000	12982000	11294000	11028000	11504000	8529700	8984400	9755900	19993000	20797000	23974000	C00517	ko00071
pma3101	256.08	124.1	256.082	C11H14NO6+	[M]+	Nicotinate D-ribonucleoside	Others	Vitamin	2717100	1905700	2128100	2203300	1789700	1317100	2891700	2644700	3225900	5328700	3115600	3687100	2628500	2221700	2827100	C05841	ko00760,ko01100
Zmyn000110	258.04	78.96	259.046	C6H14NO8P	[M-H]-	D-Glucosamine 1-phosphate	Others	Saccharides and Alcohols	72006	60051	108310	54890	105710	96151	64799	32712	55262	77012	33979	32894	70349	76020	73498	C06156	ko00520,ko01100
pme3313	259	97	260.03	C6H13O9P	[M-H]-	D-Fructose 6-phosphate	Others	Saccharides and Alcohols	124480	84607	103030	50501	63884	51338	22129	15889	20716	59902	38531	32884	63128	66462	70822	C00085	ko00052,ko00500,ko00710,ko01100,ko01110,ko01200
Zmpn000095	261.04	78.96	262.045	C6H15O9P	[M-H]-	Sorbitol-6-phosphate	Others	Saccharides and Alcohols	324970	304970	222340	165840	203160	152540	99812	74662	118330	140890	100510	109960	202100	191220	168550	C01096	ko00051,ko01100
Zmjp00966	268.11	136.06	267.097	C10H13N5O4	[M+H]+	Vidarabine	Others	Others	6152300	4480400	4798200	3263600	2037700	2290400	7413800	5943800	7020600	6286500	6487700	5786400	5680700	5484900	5420200	--	--
pme3472	271.09	107.6	272.09	C12H16O7	[M-H]-	Arbutin	Others	Others	743250	634670	453930	1456400	1696300	1153100	508640	560720	360630	893940	1217600	903950	924950	958390	1042200	C06186	ko00010
pmb1452	275.1	213.2	273.267	C16H35NO2	[M+H]+	N-Lauryldiethanolamine	Others	Others	26239	47437	32977	35629	34329	60847	35452	26092	45570	29019	20080	17969	37512	38064	41682	--	--
mws1038	277.12	146	278.13	C11H22N2O4S	[M-H]-	(R)-Pantetheine	Others	Others	120590	97416	121700	191270	224810	154990	127220	99742	129910	266400	206300	108630	143310	154870	155410	C00831	ko00332,ko00770,ko01110
pmp001230	279.16	121	278.152	C16H22O4	[M+H]+	Senkyunolide M*	Others	Others	2978100	2543000	3283100	3425400	3267600	5785500	2813600	3648800	3264000	3335800	2916100	3264400	3798000	3650800	3534800	--	--
YC512118	282.28	247.24	281.272	C18H35NO	[M+H]+	Octadecenoic amide	Others	Others	51377	122460	103320	118050	143890	207900	206760	69889	171780	83114	30500	72395	126580	137240	136630	--	--
pmn001491	283.16	59	284.162	C15H24O5	[M-H]-	Dendrobiumane D	Others	Others	159690	127630	160040	89098	63967	73444	377930	219200	338970	221140	159560	200810	201320	204740	181510	--	--
pmb3081	289	97	290.004	C6H11PO11	[M-H]-	Glucarate O-Phosphoric acid	Others	Saccharides and Alcohols	394470	584190	443170	2272400	2810900	1664700	286070	302630	307760	1257900	970770	1185100	916180	863910	868050	--	--
pme3163	289	97	290.04	C7H15O10P	[M-H]-	D-Sedoheptuiose 7-phosphate	Others	Saccharides and Alcohols	329280	447710	371040	1363900	2018800	1845300	197370	304020	238090	1298200	788460	977270	787420	876420	666730	--	--
Zmfn002862	293.21	125.1	294.219	C18H30O3	[M-H]-	13-OxoODE	Others	Others	4448500	2544400	1982600	3115700	1684500	1747000	3195200	2570900	2599200	2577500	3459100	3095200	3397700	3225200	3301900	C14765	ko00591
Zmjn004446	295.23	277.22	296.235	C18H32O3	[M-H]-	9R,10S-EpOME*	Others	Others	48473000	37639000	33427000	41950000	31674000	30299000	39724000	37434000	39663000	38296000	41457000	38583000	40619000	39840000	42566000	C14825	ko00591,ko01100
Zmgn005057	297.24	183.01	298.251	C18H34O3	[M-H]-	cis-9,10-Epoxystearic acid	Others	Others	59620	42997	38208	34929	20059	16851	61471	42702	43768	43839	46844	37005	46762	45635	47515	C19418	ko00073
pmb3079	300.05	96.9	301.056	C8H16NO9P	[M-H]-	N-Acetyl-D-glucosamine 1-phosphate	Others	Others	80833	92777	90943	49837	78047	74088	98796	97616	80389	59880	58893	44244	71107	80931	98611	C04256	--
Zmjn004133	311.22	293.21	312.23	C18H32O4	[M-H]-	9-HpODE*	Others	Others	3809900	2764900	2540400	2792300	1804800	1697800	2570200	2354700	2915600	2084100	2543300	2248700	2726800	2672300	2680800	C14827	ko00591,ko01100
mws0983	326.31	62.06	325.298	C20H39NO2	[M+H]+	N-Oleoylethanolamine	Others	Others	726020	740200	1117300	641970	731400	831650	2137600	2139100	1555400	1589700	1486100	1414700	1332800	1297000	1210300	C20792	--
HJN013	328.12	161.02	329.126	C18H19NO5	[M-H]-	N-Feruloyl-octopamine*	Others	Others	1405100	1071800	890030	958800	684750	410590	1385900	976530	1184400	544690	488590	550850	815110	905800	833950	--	--
pmb0789	332.13	152.07	331.127	C14H21NO8	[M+H]+	Pyridoxine-5'-O-glucoside	Others	Vitamin	574820	366260	406660	484290	391080	321910	596240	556150	566340	613560	738530	505840	562330	479790	495320	C03996	--
pme3311	339	97	339.996	C6H14O12P2	[M-H]-	D-Fructose-1,6-biphosphate	Others	Saccharides and Alcohols	26731	18483	28836	31381	42099	29169	22466	28910	16539	25374	33132	20170	26075	28199	27528	C00354	ko00400,ko00710,ko01100,ko01110,ko01200
Xmgp006913	341.14	137.06	340.131	C20H20O5	[M+H]+	2,4,2',4'-tetrahydroxy-3'-prenylchalcone	Others	Others	663280	666660	760570	820840	395390	165620	1159800	493860	645670	573440	608670	759500	590190	624950	598930	--	--
mws0264	341.11	119	342.116	C12H22O11	[M-H]-	D-(+)-Trehalose*	Others	Saccharides and Alcohols	32536	48836	24113	72968	54883	43087	109050	102650	135120	284790	249060	207140	117470	110880	114580	C01083	ko00500,ko01100,ko01110,ko02010
mws1080	341.11	179	342.116	C12H22O11	[M-H]-	Galactinol*	Others	Saccharides and Alcohols	88625	90779	68725	165860	145240	128560	442690	367210	463140	1472600	1185600	1061500	443650	389190	375780	C01235	ko00052,ko01100
mws1333	341.11	113	342.116	C12H22O11	[M-H]-	Melibiose*	Others	Saccharides and Alcohols	13026	12357	21931	17445	17104	27835	53796	23493	43244	96191	83492	77686	44601	39669	36744	C05402	ko00052,ko01100,ko02010
pme0519	341.11	119	342.116	C12H22O11	[M-H]-	D-(+)-Sucrose*	Others	Saccharides and Alcohols	67753	94716	51201	169900	183510	139150	344520	293680	389560	1163900	866320	843040	401060	340660	383190	C00089	ko00052,ko00500,ko01100,ko01110,ko02010
pmb0801	346.11	184.1	345.106	C14H19NO9	[M+H]+	4-Pyridoxic acid-O-glucoside	Others	Vitamin	1451700	1072300	1115700	1757700	1880500	1452600	1508100	1224000	1452000	1676100	1819200	1672000	1396900	1532900	1518900	--	--
mws4108	353.14	189.1	352.131	C21H20O5	[M+H]+	1-Methoxyphaseollin	Others	Others	41545	48121	44235	62119	28995	37188	78969	66857	81423	59126	80730	39817	63767	66251	58713	--	--
HJAP032	353.27	261.22	352.261	C21H36O4	[M+H]+	Portulene	Others	Others	13899000	12722000	11384000	10173000	9159800	9594700	2159800	2104100	6824100	4481700	4167200	8297700	8645200	7502400	8323600	--	--
mws5040	365.11	203.05	364.078	C12H21O11Na	[M+H]+	Turanose	Others	Saccharides and Alcohols	3441100	3890100	3196100	5258100	4258200	3208600	15237000	8163600	11793000	20019000	17237000	14552000	9823200	8982000	12034000	C19636	--
XMP5284	373.22	135.12	372.215	C19H32O7	[M+H]+	Blumenol C glucoside	Others	Others	7038	9183.8	6167.7	16324	10859	4922	75228	34787	119130	33679	55364	56933	35729	40473	35597	--	--
mws0232	377.15	243	376.138	C17H20N4O6	[M+H]+	Riboflavin	Others	Vitamin	1715200	1517700	1613700	1881800	1636300	1378700	3315500	2811800	2518200	2302100	2161800	2212300	2006200	2111400	2118400	C00255	ko00740,ko01100,ko01110,ko02010
Hmcn001415	387.13	225.07	388.137	C17H24O10	[M-H]-	Majoroside	Others	Others	515850	370670	384530	628360	579510	517380	382690	324460	280440	414160	574560	395820	481580	456480	437870	--	--
pmn001394	405.12	243.1	406.126	C20H22O9	[M-H]-	2,3,5,4'-Tetrahydroxystilbene-2-O-D-glucoside	Others	Stilbene	57173	32661	38589	63259	37922	36220	42364	44056	39346	36873	42345	40535	40701	34090	43678	--	--
mws2523	421.08	241.1	422.083	C12H23O14P	[M-H]-	Trehalose 6-phosphate	Others	Saccharides and Alcohols	14702	14502	19257	17156	20430	25914	16407	18150	17383	26168	29896	27233	21033	22567	22368	C00689	ko00500,ko01100,ko01110
pmp001033	423.09	405.08	422.085	C19H18O11	[M+H]+	Isomangiferin	Others	Xanthone	714800	476580	510490	1944000	1542500	1294300	904440	656030	707080	3352600	2465100	2457300	1398600	1387900	1427900	C16979	--
HJN010	597.22	387.14	598.226	C28H38O14	[M-H]-	Ligraminol B	Others	Others	3374500	3099300	3267300	1272600	1002400	931610	2821700	2556900	2893600	1670900	1306900	1405100	2436500	2051200	2457800	--	--
mws0628	121.03	92	122.037	C7H6O2	[M-H]-	4-Hydroxybenzaldehyde	Phenolic acids	Phenolic acids	3968300	5123600	3369100	6001900	5347800	4155800	2823400	2940600	2633800	3612400	5201700	5632500	4502600	4236800	4375500	C00633	ko01100
pme0241	123.04	79	122.037	C7H6O2	[M+H]+	Benzoic acid	Phenolic acids	Phenolic acids	993720	1370900	1085300	587240	671590	680340	1020600	917920	826470	656030	705920	819710	989420	984480	894260	C00180	ko00360,ko01100,ko01110
pmp001086	127.04	97	126.032	C6H6O3	[M+H]+	5-Hydroxymethylfurfural	Phenolic acids	Phenolic acids	319290	315340	337830	446230	358270	298880	535120	543570	575000	1000600	931220	985730	570740	610200	635930	C11101	--
Wmzp000668	127.04	53.04	126.032	C6H6O3	[M+H]+	Pyrogallic acid	Phenolic acids	Phenolic acids	180950	193950	158220	286450	218260	223790	287810	332010	355280	741520	669410	633490	388060	374030	350590	--	--
Hmbn002174	135.05	120.02	136.053	C8H8O2	[M-H]-	4-Hydroxyacetophenone	Phenolic acids	Phenolic acids	18251	17276	18808	32009	22904	21996	15541	20552	14621	33984	26738	32828	20565	21883	23984	C10700	ko01100
mws1336	138.06	120	137.048	C7H7NO2	[M+H]+	4-Aminobenzoic acid	Phenolic acids	Phenolic acids	29790	57231	74536	99798	50423	39710	35119	20877	36493	146050	110140	83237	62066	62947	70712	C00568	ko00790,ko01100
Lmgn001670	137.03	108.02	138.032	C7H6O3	[M-H]-	Salicylic acid*	Phenolic acids	Phenolic acids	61173	116740	59556	90372	66695	57541	50506	54201	45407	60996	78617	115220	87631	81648	67485	C00805	ko00360,ko01100,ko01110,ko04075
Hmgn001653	137.02	93.03	138.032	C7H6O3	[M-H]-	3,4-Dihydroxybenzaldehyde	Phenolic acids	Phenolic acids	16222000	11073000	15020000	8129600	6142200	6153600	13490000	11334000	13257000	11400000	8861400	9051800	11245000	11401000	11583000	--	--
Lmbn001981	137.02	93.03	138.032	C7H6O3	[M-H]-	2,5-Dihydroxybenzaldehyde	Phenolic acids	Phenolic acids	14962000	12331000	14376000	8445300	6377300	6800700	14658000	11509000	13127000	10458000	9491700	8893500	12313000	11310000	11503000	C05585	ko00350,ko01100
mws0749	137.02	93	138.032	C7H6O3	[M-H]-	4-Hydroxybenzoic acid*	Phenolic acids	Phenolic acids	20151000	17584000	19789000	10061000	8048600	7933000	17096000	15287000	17365000	13918000	11461000	11743000	14808000	13976000	13845000	C00156	ko00130,ko00790,ko01100,ko01110
pmp001285	149.02	65.04	148.016	C8H4O3	[M+H]+	Phthalic anhydride	Phenolic acids	Phenolic acids	1187400	1001000	1247700	1399100	1266100	2342500	1140500	1444000	1285200	1312300	1147900	1324200	1493000	1428900	1402800	--	--
mws1024	147.05	129	148.052	C9H8O2	[M-H]-	p-Coumaraldehyde	Phenolic acids	Phenolic acids	10585	23912	17076	30476	32668	26962	11706	17287	15359	42473	39400	61259	32367	36225	27491	C05608	ko00940,ko01100,ko01110
mws0921	149.06	131	150.068	C9H10O2	[M-H]-	p-Coumaryl alcohol	Phenolic acids	Phenolic acids	79951	121930	99019	159310	149260	152000	125170	101970	130320	330360	227080	411950	187530	196550	213710	C02646	ko00940,ko01100,ko01110
mws0458	151.04	136	152.047	C8H8O3	[M-H]-	Vanillin	Phenolic acids	Phenolic acids	823460	926360	757340	954240	759470	699180	485430	486010	382440	556370	676670	731480	721570	760050	693120	C00755	ko00998,ko01100,ko01110
mws0180	153.02	108	154.027	C7H6O4	[M-H]-	2,5-Dihydroxybenzoic acid*	Phenolic acids	Phenolic acids	10964000	6118400	8858400	1905300	1533900	1778200	11295000	6460100	12106000	8883200	5380400	6801000	8275400	7025800	6712600	C00628	ko00350,ko01100
mws0183	153.02	109	154.027	C7H6O4	[M-H]-	Protocatechuic acid*	Phenolic acids	Phenolic acids	11576000	6767500	9094800	1909500	1553300	1973800	12008000	6404100	12461000	9683300	5343200	7210500	8358900	6923700	6574400	C00230	ko01100,ko01110
mws0885	153.02	109	154.027	C7H6O4	[M-H]-	2,4-Dihydroxybenzoic acid	Phenolic acids	Phenolic acids	10773000	6521000	8835600	1838700	1578300	1891400	11924000	6593800	12247000	9068500	5269900	6632200	8359000	7090600	6243900	--	--
pmf0440	163.08	91.1	162.068	C10H10O2	[M+H]+	4-MethoxycinnaMaldehyde	Phenolic acids	Phenolic acids	250330	242040	290320	310000	341730	550980	243690	317100	294260	173850	181700	262190	318410	335310	285040	--	--
Lmbn002739	163.04	119.05	164.047	C9H8O3	[M-H]-	3-Hydroxycinnamic Acid	Phenolic acids	Phenolic acids	749000	999820	1001100	1201300	717530	554470	689260	847770	862880	715920	743610	1571500	817910	808440	784920	C12621	ko00360,ko01100
pme1439	165.05	119	164.047	C9H8O3	[M+H]+	p-Coumaric acid*	Phenolic acids	Phenolic acids	2606000	3617200	2639000	3237800	3186000	2360900	3412200	3646500	3302400	3336800	3467200	4561600	3446600	3309300	3119400	C00811	ko00130,ko00350,ko00940,ko00950,ko00998,ko01100,ko01110
Lmbn002648	163.04	119.05	164.047	C9H8O3	[M-H]-	α-Hydroxycinnamic Acid	Phenolic acids	Phenolic acids	37289000	43689000	36962000	40532000	38163000	31858000	43960000	42899000	41689000	43494000	42382000	44858000	43443000	41562000	43139000	C02763	ko00360,ko01100
Lmtp002625	165.05	147.04	164.047	C9H8O3	[M+H]+	p-Hydroxycinnamic acid*	Phenolic acids	Phenolic acids	610910	916140	702340	849680	843850	621780	873310	932230	875110	920330	939170	1205100	920830	818960	898130	--	--
pme3083	164.04	120	165.043	C8H7NO3	[M-H]-	2-(Formylamino)benzoic acid	Phenolic acids	Phenolic acids	2738600	3589900	2708900	3058300	2922300	2188300	3862800	3716500	3750000	3636400	3682500	4604600	3670500	3562700	3484700	C05653	ko00380,ko01100
pme0281	165.02	121	166.027	C8H6O4	[M-H]-	Terephthalic acid*	Phenolic acids	Phenolic acids	3118400	3484600	5363700	3533300	4350200	6014200	2623200	3311300	3874800	1114800	2388500	2734100	3768600	3269900	3888000	C06337	ko01100
mws0467	165.06	119	166.063	C9H10O3	[M-H]-	3-(4-Hydroxyphenyl)-propionic acid	Phenolic acids	Phenolic acids	117670	192530	134760	174560	169660	127950	205760	195710	237740	190460	190500	270380	194220	171040	178180	C01744	--
mws0028	167.03	108	168.042	C8H8O4	[M-H]-	Vanillic acid	Phenolic acids	Phenolic acids	7031400	5767500	8673700	4727500	4023800	3211300	6986600	6161700	5737000	4671700	3996300	4642800	6063800	5631200	5417500	C06672	--
pmb2795	177	145	178.063	C10H10O3	[M-H]-	4-Methoxycinnamic acid*	Phenolic acids	Phenolic acids	400360	687970	822970	509480	602720	742810	981520	1386500	1677800	1253100	753130	833820	976060	925750	923840	--	--
mws1195	179.07	147.1	178.063	C10H10O3	[M+H]+	Methyl p-coumarate*	Phenolic acids	Phenolic acids	502560	865110	1042700	679140	750470	1002300	1370600	1848500	1952200	1706300	1038100	1121200	1235200	1185700	1134300	--	--
mws2212	179.03	135.05	180.042	C9H8O4	[M-H]-	Caffeic acid	Phenolic acids	Phenolic acids	382330	3543800	286510	342980	5540400	294090	85338	997300	1516000	57077	630490	2027200	1267800	1290500	1265000	C01197	ko00940,ko01100,ko01110
mws0093	179.07	146	180.079	C10H12O3	[M-H]-	Coniferyl alcohol	Phenolic acids	Phenolic acids	68753	155640	86730	121940	178830	129320	133480	175620	155310	229690	224960	506490	213690	188950	172260	C00590	ko00940,ko00998,ko01100,ko01110
mws1350	181.05	151	182.058	C9H10O4	[M-H]-	Syringic Aldehyde	Phenolic acids	Phenolic acids	582060	913340	467430	855330	589110	478880	576630	619490	573390	891680	997030	1452000	790310	740680	795000	--	--
Hmtn001288	181.05	135.04	182.058	C9H10O4	[M-H]-	Methyl-(2,4-dihydroxyphenyl)acetate	Phenolic acids	Phenolic acids	239750	181440	188160	113480	81130	87408	245500	193580	264930	216700	134920	195100	175380	172300	185080	--	--
pme0422	193.06	134	194.058	C10H10O4	[M-H]-	Isoferulic Acid*	Phenolic acids	Phenolic acids	5947500	7168100	6578500	3558800	2790100	2127300	17979000	14228000	16296000	12008000	9521000	10910000	9271200	8669300	8769100	C10470	--
mws0014	193.05	134.01	194.058	C10H10O4	[M-H]-	Ferulic acid*	Phenolic acids	Phenolic acids	5161400	6605000	5609900	3458000	2574900	2023600	16569000	13328000	15888000	11353000	8765500	10651000	8853700	8564200	9023400	C01494	ko00940,ko01100,ko01110
mws0027	197.05	123	198.053	C9H10O5	[M-H]-	Syringic acid	Phenolic acids	Phenolic acids	4345900	4560000	5031900	1810200	1509100	1134700	7977300	6258800	6988600	4270600	3612500	4010300	4725800	4758800	4701200	C10833	--
Lmln010063	205.16	189.13	206.167	C14H22O	[M-H]-	2,6-Di-t-butylphenol	Phenolic acids	Phenolic acids	2402100	2117900	2479200	2484800	2847100	4384400	2259500	2790500	3164400	1972900	1868400	2200600	3128200	2942900	2828700	--	--
pme3443	207.07	192	208.074	C11H12O4	[M-H]-	Sinapinaldehyde	Phenolic acids	Phenolic acids	2523600	3295100	2457300	3968400	3455500	3007100	2346200	2410600	2527400	4004400	3530800	4661700	3417400	3235600	3386500	C05610	ko00940,ko01100,ko01110
pmb2620	207.07	133.1	208.074	C11H12O4	[M-H]-	3,4-Dimethoxycinnamic acid	Phenolic acids	Phenolic acids	157620	232450	311450	843690	909470	1138400	497390	728080	614470	3304200	2093900	2217000	1244600	1202900	1210100	--	--
mws1212	209.08	177.3	208.074	C11H12O4	[M+H]+	Methyl ferulate	Phenolic acids	Phenolic acids	448350	682260	844250	2463400	2586000	3119200	1475900	2110200	1563100	9375100	5797200	6426300	3477300	3311400	3205300	--	--
mws0853	209.08	179	210.089	C11H14O4	[M-H]-	Sinapyl alcohol	Phenolic acids	Phenolic acids	70181	107560	71892	130060	111720	91866	66525	63190	49172	78561	104000	187050	105990	105330	101960	C02325	ko00940,ko01100,ko01110
Lmlp001416	213.08	167.07	212.069	C10H12O5	[M+H]+	Oresbiusin A	Phenolic acids	Phenolic acids	44351	44222	34001	47498	44880	34349	35433	34331	32685	47398	46130	40636	40222	46282	36169	--	--
mws4085	223.06	193	224.068	C11H12O5	[M-H]-	Sinapic acid	Phenolic acids	Phenolic acids	905370	1092700	1029500	324670	241840	187320	2103700	1468200	1847500	976400	772590	766320	1058700	941080	923680	C00482	ko00940,ko01100,ko01110
Lmhn003240	237.04	121.03	238.048	C11H10O6	[M-H]-	Benzoylmalic acid	Phenolic acids	Phenolic acids	10891000	6211400	6749400	9	9	9	11268000	7895300	8685000	9	9	9	4635900	4150600	4678400	--	--
pmn001320	237.08	163.04	238.084	C12H14O5	[M-H]-	1-O-p-Cumaroylglycerol	Phenolic acids	Phenolic acids	96544	105430	111430	821990	765710	657270	74334	71850	71024	1040200	1119600	1071700	562850	549760	585400	--	--
pmn001669	237.08	147	238.084	C12H14O5	[M-H]-	Methyl sinapate	Phenolic acids	Phenolic acids	3424.5	5723.6	10348	5522.9	9311.8	9164.7	27445	48424	22463	29394	33432	19799	22777	21566	17249	--	--
Lmhn003373	253.04	137.02	254.043	C11H10O7	[M-H]-	p-Hydroxybenzoylmalic acid	Phenolic acids	Phenolic acids	115090	61982	79937	9	9	9	90373	81920	102330	9	9	9	61818	53116	65897	--	--
pmp000087	269.1	177.05	268.095	C13H16O6	[M+H]+	2-Feruloyl-sn-glycerol	Phenolic acids	Phenolic acids	60246	62295	64186	105450	126460	113020	68527	47365	50377	221760	182740	187410	86932	113700	100790	--	--
Lmlp012720	279.16	149.02	278.152	C16H22O4	[M+H]+	Dibutyl phthalate*	Phenolic acids	Phenolic acids	23423000	21133000	24986000	27390000	25139000	40868000	22283000	29627000	24842000	25583000	22981000	24673000	29665000	27686000	26704000	C14214	--
Lmhn002926	279.05	163.04	280.058	C13H12O7	[M-H]-	p-Coumaroylmalic acid	Phenolic acids	Phenolic acids	6862300	5512700	4806800	9	9	9	10334000	6897800	8194700	9	9	9	3889800	3495400	3527600	--	--
Lmhn002051	283.05	167.04	284.053	C12H12O8	[M-H]-	Vnilloylmalic acid	Phenolic acids	Phenolic acids	9233.4	4117.3	4531.4	12177	7986.7	10576	14943	11904	23656	17201	11769	16479	12624	11617	13778	--	--
HmLn007772	293.18	221.16	294.183	C17H26O4	[M-H]-	Nordihydrocapsiate	Phenolic acids	Phenolic acids	1738500	2149200	2551900	1985700	2440900	3567500	2338200	2052000	2113000	1816000	1720800	1771600	2286800	2296200	2249900	--	--
pmn001687	295.05	163.04	296.053	C13H12O8	[M-H]-	Cis-Coutaric acid	Phenolic acids	Phenolic acids	61308	48234	42969	61542	45248	46164	77870	63066	91508	119050	110160	92462	74762	83389	79610	--	--
Zmxn001997	299.08	137.02	300.084	C13H16O8	[M-H]-	Isosalicylic acid O-glycoside*	Phenolic acids	Phenolic acids	541680	539430	384760	166610	135490	145340	518230	443640	483950	315860	230700	184800	336020	311200	365910	--	--
HJN002	299.08	137.02	300.085	C13H16O8	[M-H]-	Salicylic acid O-glycoside*	Phenolic acids	Phenolic acids	603050	544720	963530	497300	399300	464980	811430	675690	821190	1113900	669990	710490	764840	754170	719990	--	--
Zmhn000892	301.09	139.05	302.1	C13H18O8	[M-H]-	4-O-Glucosyl-3,4-dihydroxybenzyl alcohol	Phenolic acids	Phenolic acids	488850	373440	446070	314460	370270	294100	544660	417470	386780	284220	395060	366210	363990	348680	402380	--	--
Lmhn003074	309.06	193.05	310.069	C14H14O8	[M-H]-	Feruloylmalic acid	Phenolic acids	Phenolic acids	249010	192260	186930	100700	65324	40170	475370	348520	427060	177350	160380	178900	246550	218260	189030	--	--
Lmhn001477	311.04	179.04	312.048	C13H12O9	[M-H]-	Caffeoyltartaric acid (Caftaric acid)	Phenolic acids	Phenolic acids	11310	8681.3	7567.5	7291	4093.3	4126.4	16397	12520	19706	7591.3	9022	8439.4	10599	8256.8	11284	--	--
Cmzp002057	315.12	255.1	314.1	C14H18O8	[M+H]+	6-O-Acetylarbutin;Pyroside	Phenolic acids	Phenolic acids	559560	153830	287450	270890	301320	203270	305110	276870	257630	417600	487600	452970	343820	302170	325950	--	--
pmb2871	315.07	153	316.079	C13H16O9	[M-H]-	2,5-Dihydroxy benzoic acid O-glucoside*	Phenolic acids	Phenolic acids	3408900	3089000	3096200	1259600	1596600	1907000	5665400	5247800	5161200	2579100	3594800	2117000	4020800	3548700	3395300	--	--
pmn001367	315.07	153.02	316.079	C13H16O9	[M-H]-	Protocatechuic acid-4-O-glucoside*	Phenolic acids	Phenolic acids	3019600	3728400	3498500	1606600	1938400	2382900	6356400	6411700	5735400	3528200	4107000	2332500	4742600	3654300	4610500	--	--
Hmtn001120	315.11	153.06	316.116	C14H20O8	[M-H]-	5-(2-Hydroxyethyl)-2-O-glucosylohenol*	Phenolic acids	Phenolic acids	228180	215270	516480	352720	239290	335170	407260	290680	290680	230480	227590	203310	318960	314930	339270	--	--
pmn001553	315.11	153.1	316.116	C14H20O8	[M-H]-	Cimidahurinine*	Phenolic acids	Phenolic acids	321530	393370	776060	556190	349350	508400	600680	475270	405450	348050	363450	243810	449620	430150	485630	--	--
pmb0751	321.1	147.3	320.09	C16H16O7	[M+H]+	Trans-5-O-(4-Coumaroyl)shikimate	Phenolic acids	Phenolic acids	33055	43788	47742	48509	40819	44818	86491	71402	106960	201120	163220	161110	96779	85255	92925	C02947	ko00940,ko00941,ko00945,ko01100,ko01110
pmn001419	325.09	163.04	326.1	C15H18O8	[M-H]-	1-O-[(E)-p-Cumaroyl]-glucose	Phenolic acids	Phenolic acids	141540	98219	130670	274170	223170	135860	237100	158030	198210	377630	301620	269550	214580	209500	260400	--	--
pmn001690	327.14	165.09	328.152	C16H24O7	[M-H]-	3-Hydroxy-4-isopropylbenzylalcohol 3-glucoside	Phenolic acids	Phenolic acids	83869	50066	65061	81751	81518	58572	71090	74831	53765	57034	54791	52710	71649	58146	72145	--	--
Lmtn002565	329.11	167.03	330.095	C14H18O9	[M-H]-	1-O-Vanilloyl-β-D-Glucose	Phenolic acids	Phenolic acids	79519	56342	66269	99104	86590	82322	129760	110360	143520	210240	119450	198390	144320	103920	157580	C20470	--
pmn001517	329.12	167	330.131	C15H22O8	[M-H]-	3,4,5-Trimethoxyphenyl-Glucoside	Phenolic acids	Phenolic acids	15124000	15063000	10713000	11247000	12152000	9189000	12021000	11933000	10097000	5847400	9990300	6787900	11747000	10984000	10742000	--	--
Zmhn001703	331.07	169.02	332.074	C13H16O10	[M-H]-	5-O-Galloyl-D-hamamelose*	Phenolic acids	Phenolic acids	1413900	1399900	720790	15547000	16523000	6959800	333860	371570	176580	1771300	2709600	1934600	4594000	4390200	4234200	--	--
Hmln002806	335.08	179.03	336.085	C16H16O8	[M-H]-	5-O-Caffeoylshikimic acid	Phenolic acids	Phenolic acids	194840	2207200	191080	143920	2464300	144900	29334	748940	1047800	12418	313470	1212500	729800	758150	780870	C10434	ko00940,ko00941,ko00945,ko01100,ko01110
pmp000232	339.11	147.04	338.1	C16H18O8	[M+H]+	Cis-3-p-coumaric quinic acid	Phenolic acids	Phenolic acids	207170	363670	325650	86125	112230	182300	281880	229100	255190	123800	114400	120100	217540	200930	189110	--	--
Lmmn000774	343.1	181.05	344.111	C15H20O9	[M-H]-	Dihydrocaffeoylglucose	Phenolic acids	Phenolic acids	94610	70038	37357	93451	93270	61500	52284	39649	28602	60448	73449	71958	88550	66144	68700	--	--
mws2108	353.09	135.1	354.095	C16H18O9	[M-H]-	Cryptochlorogenic acid*	Phenolic acids	Phenolic acids	135440	99344	103020	99595	73838	88368	172410	143560	160760	190000	103310	101670	127350	130900	101760	--	--
mws0178	353.09	191.01	354.095	C16H18O9	[M-H]-	Chlorogenic acid*	Phenolic acids	Phenolic acids	647990	48222	16603	70611	37604	20816	37556	14708	29386	25394	41873	34183	85866	79745	79025	C00852	ko00940,ko00941,ko00945,ko01110
Zmhn002422	355.1	193.05	356.11	C16H20O9	[M-H]-	Feruloyl glucose	Phenolic acids	Phenolic acids	96968	91458	165900	354520	253150	249590	188430	140270	154300	368980	418630	289230	226980	243690	262340	C17759	--
Zmhn002334	355.1	193.05	356.111	C16H20O9	[M-H]-	6-O-Feruloyl-glucose*	Phenolic acids	Phenolic acids	9	9	9	200010	70181	67912	227960	221680	228460	339300	185560	284940	207070	171100	202270	--	--
pme0085	359.08	196.7	360.084	C18H16O8	[M-H]-	Rosmarinic acid	Phenolic acids	Phenolic acids	174660	127260	79216	272290	209130	92958	136420	95239	60766	86123	130630	119970	131960	156260	124110	C01850	ko00350,ko01100
pmb3107	359.1	182.1	360.106	C15H20O10	[M-H]-	Glucosyringic Acid	Phenolic acids	Phenolic acids	4463500	4436700	3680800	2872300	3160800	1880900	3760000	3278400	2818100	2145000	2938900	2826900	3338000	3179000	3195600	--	--
pma3724	369.1	177.1	368.111	C17H20O9	[M+H]+	1-O-Feruloylquinic acid*	Phenolic acids	Phenolic acids	1317100	1219600	1142200	478270	502250	416600	2416500	2724500	2629500	807500	474170	974260	1238300	1232500	1239100	--	--
mws0179	367.1	190.9	368.111	C17H20O9	[M-H]-	Chlorogenic acid methyl ester	Phenolic acids	Phenolic acids	78066	145840	149900	42144	29909	30655	204190	285380	316920	96339	90120	91137	155690	142410	124120	--	--
pmb0752	369.12	177.1	368.111	C17H20O9	[M+H]+	3-O-Feruloylquinic acid*	Phenolic acids	Phenolic acids	5121700	4211000	3609300	3019100	2395200	2386400	6914100	4774500	7909200	6500700	3719500	4735200	4489900	4626900	5154000	C02572	--
pmn001695	371.1	249.06	372.106	C16H20O10	[M-H]-	Trihydroxycinnamoylquinic acid	Phenolic acids	Phenolic acids	11567000	13917000	10369000	9040900	11317000	8359500	9088900	7618700	7790500	10767000	10579000	11513000	10240000	10432000	9929800	--	--
mws0011	371.13	209	372.142	C17H24O9	[M-H]-	Syringin	Phenolic acids	Phenolic acids	167230	105730	102360	24675	22868	20017	79875	63637	70791	30592	29389	20877	63869	67942	62092	C01533	ko00940
Hmbn005951	383.12	163.04	384.121	C21H20O7	[M-H]-	1,3-O-Di-p-Coumaroylglycerol	Phenolic acids	Phenolic acids	8683.3	9444.3	9686.7	48318	30843	36720	16987	11081	11360	315380	254790	179330	92130	87955	96296	--	--
pmb3062	385.1	151.1	386.102	C17H22O10	[M-H]-	Eudesmoyl quinic acid	Phenolic acids	Phenolic acids	120680	75623	87022	457700	516720	386220	91419	66709	87471	314050	491250	533510	291740	271910	292600	--	--
Zmhn002227	385.11	223.06	386.121	C17H22O10	[M-H]-	4-O-Glucosyl-sinapate	Phenolic acids	Phenolic acids	554710	449520	446710	493960	506100	435730	429310	431480	297070	442930	566750	332050	470800	493090	427920	C02919	--
HJN003	385.11	223.06	386.122	C17H22O10	[M-H]-	1-O-Sinapoyl-D-glucose*	Phenolic acids	Phenolic acids	456030	598520	522840	170800	140210	134070	1130300	962770	1178700	510750	428520	369210	574370	566180	608080	C01175	ko00940
Lmzn001582	387.17	207.1	388.174	C18H28O9	[M-H]-	5'-Glucosyloxyjasmanic acid	Phenolic acids	Phenolic acids	120870	133350	103690	79923	88766	47388	210800	196710	195370	94817	108520	92145	126560	124280	132910	--	--
pma0110	399	207.2	398.121	C18H22O10	[M+H]+	O-Sinapoyl quinic acid	Phenolic acids	Phenolic acids	338150	342400	353690	421580	328250	284420	645370	411810	629780	742610	747650	853990	584540	584360	535700	--	--
pmn001319	413.12	398.1	414.131	C22H22O8	[M-H]-	1-O-Feruloyl-3-O-p-Coumaroylglycerol*	Phenolic acids	Phenolic acids	10081	17230	15460	136970	86831	90026	34062	22697	20066	763880	574690	500050	210880	222210	210860	--	--
Lmhn204620	425.09	277.03	426.095	C22H18O9	[M-H]-	p-Coumaroylp-coumaroylmalic acid*	Phenolic acids	Phenolic acids	13612	10316	9782.9	11355	9657.7	8046.1	12885	11343	13085	11544	9454.9	6659.1	9268.8	10864	11392	--	--
Lmhn104620	425.09	277.03	426.095	C22H18O9	[M-H]-	p-Coumaroylcinnamoyltartaric acid*	Phenolic acids	Phenolic acids	10447	11549	11397	7710.8	5953.1	6301.2	10752	13086	9482.3	6821.7	10008	10884	9156.4	10737	10952	--	--
Cmzn005251	433.11	271.06	434.121	C21H22O10	[M-H]-	6-O-Caffeoylarbutin	Phenolic acids	Phenolic acids	11991	11592	15710	29024	24758	57092	14755	6531	8370.8	40636	22869	23627	26202	22056	31329	--	--
Hmbp006861	445.15	177.05	444.142	C23H24O9	[M+H]+	1,2-O-Diferuloylglycerol*	Phenolic acids	Phenolic acids	2810700	4917600	4421000	7001800	3793300	4388800	17250000	10512000	6898600	38872000	27429000	28783000	15160000	13629000	16185000	--	--
pmp000091	445.15	177.05	444.142	C23H24O9	[M+H]+	Glyceryl-1,3-diferulate*	Phenolic acids	Phenolic acids	3409800	6804000	7264200	9330800	4209300	5914800	15374000	12536000	11630000	34390000	31535000	26935000	18670000	16756000	16125000	--	--
pmb0478	455.15	147.4	454.148	C21H26O11	[M+H]+	Coumarin O-rutinoside	Phenolic acids	Phenolic acids	13274	16305	14823	13747	10211	9164.1	28411	36510	38453	26645	27022	29390	19459	21828	26324	--	--
mad2085	457.08	295.04	458.085	C22H18O11	[M-H]-	Caffeoyl-p-coumaroyltartaric acid	Phenolic acids	Phenolic acids	22762	16356	9850.5	41054	30942	15204	10244	8914.2	11567	25289	31997	26373	18789	24789	25254	--	--
pmn001468	461.13	137	462.137	C19H26O13	[M-H]-	Sibiricose A3	Phenolic acids	Phenolic acids	22569	19424	9	240270	194870	130110	58523	49728	41310	363780	268350	319560	181610	166910	179200	--	--
pmb3066	481.14	319.2	482.142	C22H26O12	[M-H]-	5-O-p-Coumaroylshikimic acid O-glucoside	Phenolic acids	Phenolic acids	17098	17291	23678	26100	19536	30142	24407	17722	27112	39075	39778	26210	24943	29292	26257	--	--
pmb3061	499.15	163.1	500.153	C22H28O13	[M-H]-	5-O-p-Coumaroylquinic acid O-glucoside	Phenolic acids	Phenolic acids	12495	13713	8257	8102.2	5160.6	9735.6	7301.1	8414.5	12200	6401.4	8919.9	9	7577.3	8719.4	8699.1	--	--
Hmbn002692	517.16	175.04	518.164	C22H30O14	[M-H]-	6'-O-Feruloylsucrose	Phenolic acids	Phenolic acids	108020	101560	9	844530	444340	369850	479260	355800	376210	1566100	1021200	1268500	578060	623330	687820	--	--
pmb2833	529.16	193.1	530.164	C23H30O14	[M-H]-	3-O-Feruloylquinic acid glucoside*	Phenolic acids	Phenolic acids	443330	345640	315110	585110	441780	452600	528600	382940	489880	1097700	582590	895610	610790	530440	748620	--	--
pmb2554	529.16	193.1	530.164	C23H30O14	[M-H]-	5-O-Feruloyl quinic acid glucoside*	Phenolic acids	Phenolic acids	410500	314390	328710	605240	518110	486890	570670	454650	466700	1182100	675000	965060	684680	565730	602110	--	--
pmn001672	547.17	223.1	548.174	C23H32O15	[M-H]-	Furanofructosyl-α-D-(3-mustard acyl)glucoside	Phenolic acids	Phenolic acids	9	9	9	942300	669850	502130	98538	123170	127000	843430	1056400	1117400	613900	538400	489640	--	--
pmn001671	547.17	223.1	548.174	C23H32O15	[M-H]-	Furanofructosyl-α-D-(6-mustard acyl)glucoside	Phenolic acids	Phenolic acids	9	9	9	837950	674210	523740	145410	72407	65020	910540	1049800	1191800	544170	521680	541770	--	--
pmb2936	591.17	367.2	592.179	C28H32O14	[M-H]-	Disinapoyl glucoside	Phenolic acids	Phenolic acids	2246.7	3645.6	2876.7	2018.1	2072.7	9	20198	10844	19826	12730	20124	13025	10405	9704.7	9341.6	--	--
pmb2819	665.1	218.1	666.201	C27H38O19	[M-H]-	O-Caffeoyl maltotriose	Phenolic acids	Phenolic acids	9	9	9	108610	66013	48707	9	9	9	246390	166710	116770	70844	62557	51519	--	--
Wmhn001652	203.08	116.05	204.042	C11H8O4	[M-H]-	3-Methoxy-juglone	Quinones	Quinones	17289000	12215000	11304000	4170300	5004000	6046800	18949000	15172000	17022000	8457000	7879200	6250900	11703000	11302000	11494000	--	--
Cmhp005227	339.11	177.05	338.1	C16H18O8	[M+H]+	4,8-Dihydroxy Naphthol-1-O-glucoside	Quinones	Quinones	56627	87391	75746	446970	346110	279420	166020	105610	160310	556630	401950	449240	316660	254120	290830	--	--
mws0024	169.01	125	170.022	C7H6O5	[M-H]-	Gallic acid	Tannins	Tannin	426730	386990	367610	106590	54702	42169	479950	297330	448270	102500	97966	143510	289870	255030	228490	C01424	--
Lmfp001509	317.09	153.02	316.079	C13H16O9	[M+H]+	1-O-Galloyl-rhamnose	Tannins	Tannin	22063	12200	18186	14411	13493	12429	33620	22662	29563	20074	15459	16075	20255	21278	19297	--	--
Lmfn000604	331.07	169.01	332.074	C13H16O10	[M-H]-	6-O-Galloyl-glucose*	Tannins	Tannin	1465900	1300600	787360	14634000	16196000	6632500	353000	309710	167260	1761900	2775300	1890800	4724300	4213700	3922100	--	--
HmLn000873	331.07	169.01	332.075	C13H16O10	[M-H]-	2-O-Galloyl-glucose	Tannins	Tannin	1403500	1390200	745240	14313000	16298000	7065200	339690	309440	193000	1731000	2732400	1892600	4550200	4507200	4431600	--	--
HmLn000659	331.07	169.01	332.075	C13H16O10	[M-H]-	3-O-Galloyl-glucose*	Tannins	Tannin	1488200	1321600	756150	14467000	15491000	6693100	273360	320980	166790	1639200	2655700	1941600	4346400	4154600	4049300	--	--
Hmgp005956	223.13	149.02	222.125	C13H18O3	[M+H]+	Dehydrovomifoliol	Terpenoids	Sesquiterpenoids	195210	174100	172200	201910	200320	320320	156310	190210	191520	127120	144090	149120	208810	200240	224500	--	--
Lmyp010328	319.23	259.2	318.219	C20H30O3	[M+H]+	2-Oxokovalenic acid	Terpenoids	Ditepenoids	9	9	306150	82916	68232	349180	9	9	9	43948	102600	117400	96746	88656	97041	--	--
Cmrn002205	329.12	209.07	330.131	C15H22O8	[M-H]-	Bartsioside	Terpenoids	Monoterpenoids	64218	48509	66925	89667	49141	46289	105170	84420	113750	121430	99877	117510	101820	88785	82159	--	--
pmp000695	375.13	177.05	374.121	C16H22O10	[M+H]+	Swertiamarin	Terpenoids	Sesquiterpenoids	22769	29972	34873	60179	42678	42376	47364	42942	42649	68602	85010	60889	44217	45314	51922	C09800	--
Hmbn009700	455.35	455.34	456.36	C30H48O3	[M-H]-	Betulinic acid*	Terpenoids	Triterpene	20316	21289	24145	30778	45805	28444	77384	65823	72263	62167	86060	81035	46869	53291	62222	C08619	--
Lmmn004145	675.41	397.14	679.419	C38H60O10	[M-H]-	3-O-(2-O-Acetyl-glucosyl)oleanolic acid	Terpenoids	Triterpene	9642000	16884000	12719000	8755300	9184500	10663000	306240	430300	4417600	2338900	1772000	5495700	6337600	5333000	5364500	--	--
pmn001505	763.43	763.4	764.435	C41H64O13	[M-H]-	Oleanolic acid-3-O-xylose(1→3)-glucuronide	Terpenoids	Triterpene Saponin	36206	67463	50159	34857	56764	47829	9417.3	9	15518	11322	13122	33707	22662	18772	26091	--	--

## Sheet: Table S2
Table S2: Differential accumulation of metabolites between CK without Al toxicity and CK with Al toxicity
					Peak aera			Peak aera
Index	Formula	Compounds	Class I	Class II	CK-1	CK-2	CK-3	CK-1-1	CK-1-2	CK-1-3	VIP(≥0.5)	Fold_Change	Log2FC	Type
pmb0489	C19H28N2O7	N-Glucosyl-p-coumaroyl putrescine	Alkaloids	Phenolamine	371170	326140	577740	2691300	1901800	2619100	1.43272	5.65641	2.49989	up
pmb0490	C13H18N2O2	p-Coumaroylputrescine	Alkaloids	Phenolamine	591020	477430	636660	3526500	2265100	3138100	1.44643	5.23702	2.38875	up
pmb1096	C8H7N	Indole	Alkaloids	Plumerane	409440	386920	498240	1951300	1486000	1498600	1.45037	3.81268	1.93081	up
pmb0500	C23H26N2O5	N-p-Coumaroyl-N'-feruloylputrescine	Alkaloids	Phenolamine	4266	11540	7287.1	39810	14711	24127	1.23863	3.40569	1.76795	up
pmb0776	C20H20N2O3	N-Feruloyl tryptamine	Alkaloids	Phenolamine	10422	14053	31253	75737	43934	61261	1.2787	3.2467	1.69897	up
Lmhp005784	C24H28N2O5	p-Coumaroylferuloylcadaverine	Alkaloids	Phenolamine	5393.7	4342.9	6802.6	22362	14040	13011	1.37131	2.98763	1.579	up
mws0005	C10H12N2	Tryptamine	Alkaloids	Plumerane	1779600	1379600	3801200	6290500	4063200	9562600	1.19316	2.86137	1.51671	up
Lmlp003161	C14H20N2O3	Feruloylputrescine	Alkaloids	Phenolamine	7436500	5810500	6410700	19181000	13776000	19294000	1.42122	2.65804	1.41036	up
Lmmp002013	C14H22N2O3	Dihydroferuloylputrescine	Alkaloids	Phenolamine	8051000	6361400	7757100	20237000	15183000	21881000	1.41696	2.58468	1.36998	up
pmf0557	C16H11N2NaO4S	Shikonin	Alkaloids	Alkaloids	777220	751890	694070	1815400	1510600	2297800	1.4202	2.52962	1.33892	up
pmb0323	C13H18N2O3	N-Caffeoylputrescine	Alkaloids	Phenolamine	865490	539370	559080	1671600	1309100	1978500	1.35916	2.52513	1.33636	up
pmp001214	C16H24NO5+	Sinapine	Alkaloids	Alkaloids	36996	40474	37205	96622	94854	89008	1.46694	2.4459	1.29037	up
XMP3554	C9H9NO4	HMBOA	Alkaloids	Alkaloids	41805	58247	33844	94109	96144	133040	1.3529	2.41451	1.27173	up
pmb0501	C5H14N4	Agmatine	Alkaloids	Phenolamine	630750	319870	419840	933700	909450	1197600	1.29931	2.21878	1.14977	up
Lmhp005550	C24H28N2O6	N,N'-Diferuloylputrescine	Alkaloids	Phenolamine	21268	30752	30912	65024	56734	60168	1.40329	2.19368	1.13335	up
pmb0492	C34H37N3O6	N',N'',N'''-p-Coumaroyl-cinnamoyl-caffeoyl spermidine	Alkaloids	Phenolamine	424630	332980	412690	892340	834050	780860	1.43392	2.1424	1.09923	up
pmb0494	C15H22N2O4	Sinapoylputrescine	Alkaloids	Phenolamine	548590	540080	529200	1112200	928890	1376300	1.40716	2.11228	1.0788	up
pme2693	C6H14N2O	N-Acetylputrescine	Alkaloids	Phenolamine	641060	300110	446270	972990	832110	1114300	1.25746	2.10416	1.07325	up
Lmhp005872	C25H30N2O6	Diferuloylcadaverine	Alkaloids	Phenolamine	17675	15489	19942	33106	37113	40288	1.42224	2.08088	1.05719	up
Lmhp002153	C13H18N2O3	N-p-Coumaroylhydroxyputrescine	Alkaloids	Phenolamine	416180	284130	559700	777200	767740	1059000	1.26028	2.0666	1.04726	up
pmb0496	C15H22N4O3	N-Feruloylagmatine	Alkaloids	Phenolamine	4122900	4142100	7722200	12003000	8127700	12481000	1.22286	2.03986	1.02847	up
Xmzp009846	C32H41N5O5	A-ergocryptine	Alkaloids	Alkaloids	13604	19313	9164.8	2852.1	2233.4	5346.8	1.32423	0.247905	-2.01214	down
Rfmb319	C6H11NO2	Pipecolic acid	Amino acids and derivatives	Amino acids and derivatives	9840800	5974200	8271700	16971000	15184000	22103000	1.33896	2.25261	1.1716	up
pme0376	C15H12O5	Naringenin	Flavonoids	Dihydroflavone	9	9	32453	52720	27275	66760	1.06636	4.51957	2.17619	up
pmp001082	C30H34O17	Sudachiin C	Flavonoids	Flavonoid	2513.1	5248.1	5512.2	10889	8898	8550	1.23851	2.13487	1.09415	up
mws0036	C28H34O15	Hesperetin-7-O-rutinoside (Hesperidin)*	Flavonoids	Dihydroflavone	122610	82399	26876	28141	26021	15088	1.07625	0.298639	-1.74352	down
pmb0235	C19H14O5	O-Feruloyl coumarin	Lignans and Coumarins	Coumarins	321780	234550	485810	1574500	1257900	1530300	1.40704	4.18629	2.06567	up
mws1013	C9H6O4	Esculetin	Lignans and Coumarins	Coumarins	22362	43693	21816	66914	69476	81466	1.32575	2.47927	1.30992	up
pmn001378	C26H32O11	Terpineol mono-glucoside	Lignans and Coumarins	Lignans	115130	140540	111240	60971	40194	66181	1.34593	0.456096	-1.13259	down
Lmbn005287	C18H32O4	7S,8S-DiHODE; (9Z,12Z)-(7S,8S)-Dihydroxyoctadeca-9,12-dienoic acid	Lipids	Free fatty acids	15506	11808	11581	46213	63716	40620	1.42565	3.87065	1.95258	up
pmn001691	C18H32O5	9,12,13-Trihyroxy-10,15-octadecadienoic acid	Lipids	Free fatty acids	3671500	2933000	3126900	6579400	6030600	8098000	1.41083	2.12796	1.08947	up
Rfmb087	C18H32O4	13-Oxo-9-hydroxy-10-octadecenoic acid*	Lipids	Free fatty acids	28702000	21010000	18370000	10851000	9801000	11435000	1.3756	0.471299	-1.08528	down
pmb0164	C21H38O4	MAG(18:2)isomer1	Lipids	Glycerol ester	84371	112320	116640	50761	38296	56480	1.35956	0.464483	-1.1063	down
Lmhp009526	C27H46O9	2-γ-Linolenoyl-glycerol-glucoside*	Lipids	Glycerol ester	324720	293370	236970	47002	36218	299210	1.008	0.447255	-1.16083	down
Lmhp008688	C25H42NO7P	LysoPE 20:5	Lipids	LPE	219600	299790	245620	110510	141950	87912	1.36422	0.444925	-1.16837	down
Lmhp008742	C28H48NO7P	LysoPC 20:5	Lipids	LPC	1284900	1513000	1017000	398050	630650	494350	1.37779	0.399237	-1.32468	down
pmd0160	C21H44NO7P	LysoPE 16:0(2n isomer)	Lipids	LPE	12524000	11744000	11478000	4528600	4490400	3937500	1.46331	0.36246	-1.46411	down
Lmhp007836	C21H38NO7P	LysoPE 16:3	Lipids	LPE	31481	31070	48760	14710	11025	7240.6	1.35881	0.296247	-1.75513	down
pmb0856	C23H46NO7P	LysoPE 18:1(2n isomer)*	Lipids	LPE	41186000	37713000	30649000	12190000	10993000	9069700	1.44059	0.294416	-1.76407	down
mws0289	C23H46NO7P	LysoPE 18:1*	Lipids	LPE	39364000	30628000	25034000	10904000	9758100	7302200	1.41172	0.294281	-1.76474	down
Lmhp009349	C25H44NO7P	LysoPE 20:4(2n isomer)*	Lipids	LPE	635310	302450	342400	120530	127540	116200	1.37709	0.28455	-1.81324	down
pmb0880	C23H48NO7P	LysoPE 18:0(2n isomer)	Lipids	LPE	235960	195080	169410	63071	56487	44336	1.43644	0.272952	-1.87328	down
pmb2319	C23H48NO7P	LysoPC 15:0*	Lipids	LPC	1318600	1015500	577850	164850	281310	314030	1.33323	0.261059	-1.93755	down
Lmhp009590	C25H50NO7P	LysoPC 17:1	Lipids	LPC	28289000	10918000	10264000	4019900	4982000	3795600	1.2974	0.258687	-1.95072	down
pmb2406	C25H52NO7P	LysoPC 17:0*	Lipids	LPC	293900	355170	123460	27940	51336	117730	1.18938	0.255014	-1.97135	down
Lmhp010190	C26H52NO7P	LysoPC 18:1(2n isomer)	Lipids	LPC	46785000	54998000	31998000	7258700	10869000	13321000	1.39857	0.235076	-2.0888	down
Lmhp010514	C25H48NO7P	LysoPE 20:2(2n isomer)	Lipids	LPE	326550	85470	161590	37587	51117	38456	1.27924	0.221684	-2.17343	down
pmb2260	C23H46NO7P	LysoPC 15:1	Lipids	LPC	507130	276860	338340	122290	64215	61968	1.37637	0.22139	-2.17534	down
pmp001283	C21H38O4	Glyceryl linoleate	Lipids	Glycerol ester	1503200	1409500	1056000	121010	135780	619810	1.26385	0.220878	-2.17868	down
pmb0883	C23H48NO7P	LysoPE 18:0	Lipids	LPE	86706	63433	59671	20517	10242	14335	1.40623	0.214928	-2.21808	down
Hmqp006235	C21H46N3O9P	LysoPC 18:4	Lipids	LPC	294370	138680	141270	33676	36094	42852	1.4007	0.196096	-2.35037	down
Lmhp010573	C27H48O9	1-Linoleoylglycerol-glucoside*	Lipids	Glycerol ester	148090	146510	115100	8981.2	11129	59855	1.26211	0.19518	-2.35712	down
Lmhp008589	C23H42NO7P	LysoPE 18:3(2n isomer)*	Lipids	LPE	15955000	12023000	7609700	1944200	1477200	3468400	1.36512	0.193601	-2.36884	down
Lmhp010757	C25H48NO7P	LysoPE 20:2	Lipids	LPE	340200	97197	158510	33901	47057	31812	1.32451	0.189241	-2.4017	down
Lmhp008801	C23H42NO7P	LysoPE 18:3*	Lipids	LPE	14256000	11976000	7282200	1644400	1235000	3247800	1.36357	0.182824	-2.45147	down
Lmhp008513	C33H56O14	2-γ-Linolenoyl-glycerol-diglucoside*	Lipids	Glycerol ester	229830	349720	374320	12926	19014	136730	1.23046	0.176827	-2.49959	down
pmb0865	C26H48NO7P	LysoPC 18:3(2n isomer)	Lipids	LPC	26469000	29077000	14967000	2406400	2032600	7758400	1.31793	0.172981	-2.53132	down
Lmhp010334	C27H48O9	2-Linoleoylglycerol-glucoside*	Lipids	Glycerol ester	159720	157220	121210	10373	13640	51385	1.3182	0.172083	-2.53883	down
Lmhp008744	C33H56O14	1-α-Linolenoyl-glycerol-diglucoside*	Lipids	Glycerol ester	249770	394760	282180	9775.7	15156	131010	1.22271	0.168275	-2.57111	down
Lmhp008718	C25H48NO7P	LysoPC 17:2	Lipids	LPC	491700	283860	184570	39822	34481	83460	1.34853	0.164314	-2.60547	down
pmd0132	C24H50NO7P	LysoPC 16:0(2n isomer)	Lipids	LPC	10388000	13595000	5877800	1112000	1461200	2004100	1.39873	0.153288	-2.70568	down
Lmhp011549	C28H56NO7P	LysoPC 20:1	Lipids	LPC	937380	539850	236780	97664	86136	66949	1.33329	0.146294	-2.77306	down
Lmhp008233	C23H40NO7P	LysoPE 18:4	Lipids	LPE	77144	30203	48094	9682.1	8269.1	4764.3	1.38396	0.146136	-2.77462	down
pmd0146	C28H54NO7P	LysoPC 20:2(2n isomer)*	Lipids	LPC	1016900	363140	342570	59042	97556	91255	1.3607	0.143882	-2.79704	down
pmd0147	C28H54NO7P	LysoPC 20:2*	Lipids	LPC	1092000	392110	357570	64212	105980	94634	1.35919	0.143796	-2.79791	down
Lmhp010515	C25H52NO7P	LysoPC 17:0(2n isomer)*	Lipids	LPC	3237900	1344800	726370	205340	202410	344000	1.30705	0.141597	-2.82013	down
pmb0296	C21H40O4	MAG(18:1)isomer2*	Lipids	Glycerol ester	9878600	14408000	12493000	395940	500100	3535400	1.29652	0.120486	-3.05306	down
pmb2363	C21H40O4	MAG(18:1)isomer1*	Lipids	Glycerol ester	9934500	14776000	13248000	390720	517210	3664900	1.29332	0.120469	-3.05326	down
pmd0136	C26H54NO7P	LysoPC 18:0(2n isomer)	Lipids	LPC	2102200	1914200	859400	102220	122770	351000	1.35196	0.118132	-3.08152	down
Lmhp009384	C33H58O14	1-Linoleoylglycerol-diglucoside*	Lipids	Glycerol ester	524770	703930	595020	14421	20088	157890	1.29948	0.105498	-3.24471	down
pmp001271	C33H58O14	2,3-Dihydroxypropyl-9,12-octadecadienoate-hexose-hexose*	Lipids	Free fatty acids	376370	685710	754580	10055	17404	156500	1.2711	0.101262	-3.30383	down
pmb0874	C23H44NO7P	LysoPE 18:2(2n isomer)*	Lipids	LPE	1298900	996060	616690	84865	56137	144790	1.40804	0.0981547	-3.3488	down
pmp001251	C26H50NO7P	LysoPC 18:2(isomer)	Lipids	LPC	6824400	5357000	2848400	230270	193940	878050	1.35888	0.0866452	-3.52874	down
Lmhp010162	C22H46NO7P	LysoPE 17:0	Lipids	LPE	934680	523390	2612600	116350	111570	95339	1.36445	0.0794117	-3.6545	down
Lmhp009682	C30H52NO7P	LysoPC 22:5(2n isomer)	Lipids	LPC	266670	167230	104590	10407	16007	15073	1.4327	0.0770432	-3.69819	down
Lmhp010041	C27H46NO7P	LysoPE 22:5	Lipids	LPE	550200	108610	247540	49455	6784.3	5285.2	1.27743	0.0678816	-3.88084	down
Lmhp009802	C25H46NO7P	LysoPE 20:3(2n isomer)*	Lipids	LPE	742570	167980	332800	26005	23021	29133	1.3981	0.0628616	-3.99168	down
Lmhp010394	C30H54NO7P	LysoPC 22:4	Lipids	LPC	636760	274430	180860	22202	22436	13752	1.41483	0.0534682	-4.22517	down
Lmhp009890	C28H52NO7P	LysoPC 20:3	Lipids	LPC	6123600	2431100	2568200	145090	131420	243260	1.43326	0.0467297	-4.41952	down
Lmhp010099	C30H52NO7P	LysoPC 22:5	Lipids	LPC	1672000	601460	864710	98164	18927	21907	1.3783	0.0442927	-4.49679	down
Lmhp009368	C30H50NO7P	LysoPC 22:6	Lipids	LPC	267610	228210	217630	16820	4096.5	8483.2	1.42344	0.0412078	-4.60094	down
Lmhp010908	C27H54NO7P	LysoPC 19:1	Lipids	LPC	12446000	10544000	3401200	135570	151000	779970	1.36178	0.0404127	-4.62905	down
pmb0964	C16H23N5O5	Isopentenyladenine-7-N-glucoside	Nucleotides and derivatives	Nucleotides and derivatives	212290	295980	200990	958330	716350	735550	1.43323	3.39823	1.76478	up
mws0251	C5H6N2O2	Thymine	Nucleotides and derivatives	Nucleotides and derivatives	49221	89160	47596	117310	160000	106750	1.24657	2.06509	1.04621	up
pme2117	C10H15N5O10P2	Adenosine 5'-diphosphate	Nucleotides and derivatives	Nucleotides and derivatives	27759	26326	20419	7606.8	10764	10677	1.40729	0.389882	-1.35889	down
pme3174	C9H14N3O8P	Cytidine 5'-monophosphate(Cytidylic acid)	Nucleotides and derivatives	Nucleotides and derivatives	366540	213000	242930	49794	100840	148610	1.23416	0.363836	-1.45864	down
pme3188	C9H13N2O9P	Uridine 5'-monophosphate	Nucleotides and derivatives	Nucleotides and derivatives	1386500	972750	1065600	260500	332300	580020	1.33917	0.342444	-1.54606	down
pmb0981	C10H14N5O7P	Adenosine 5'-monophosphate	Nucleotides and derivatives	Nucleotides and derivatives	909130	812080	794260	281430	168980	306800	1.40111	0.301021	-1.73206	down
mws0609	C10H12N5O7P	Guanosine 3',5'-cyclic monophosphate	Nucleotides and derivatives	Nucleotides and derivatives	2514200	706320	621290	316250	291500	349310	1.17371	0.249117	-2.0051	down
Lmmn003323	C16H32O3	2-Hydroxyhexadecanoic acid	Organic acids	Organic acids	3061600	1768400	2192900	10180000	6880200	9143600	1.41044	3.73119	1.89964	up
pme2049	C4H8O3	2-Hydroxybutanoic acid*	Organic acids	Organic acids	23577	24464	30740	71850	61884	80867	1.43572	2.72402	1.44574	up
mws0576	C4H8O3	3-Hydroxybutyrate*	Organic acids	Organic acids	7085000	7083700	10358000	20814000	16035000	21996000	1.38484	2.39922	1.26257	up
pme1975	C3H4O4	Malonic acid	Organic acids	Organic acids	7441900	7111400	10771000	21841000	15683000	22024000	1.36762	2.35142	1.23353	up
mws0341	C6H12O3	(S)-(-)-2-Hydroxyisocaproic acid	Organic acids	Organic acids	628710	1846800	1267300	3187800	2789200	2821200	1.22779	2.35069	1.23309	up
Zmyn000247	C5H8O5	(S)-2-Hydroxyglutaric Acid	Organic acids	Organic acids	85836	80183	99567	191440	169820	187960	1.442	2.06796	1.04821	up
Lmbn003524	C9H16O3	9-Oxononanoic acid	Organic acids	Organic acids	1776600	1204400	1123100	734060	485470	632260	1.32585	0.451205	-1.14815	down
XMP5284	C19H32O7	Blumenol C glucoside	Others	Others	7038	9183.8	6167.7	75228	34787	119130	1.39741	10.2345	3.35537	up
mws1080	C12H22O11	Galactinol*	Others	Saccharides and Alcohols	88625	90779	68725	442690	367210	463140	1.45894	5.13056	2.35912	up
pme0519	C12H22O11	D-(+)-Sucrose*	Others	Saccharides and Alcohols	67753	94716	51201	344520	293680	389560	1.43217	4.81003	2.26605	up
mws5040	C12H21O11Na	Turanose	Others	Saccharides and Alcohols	3441100	3890100	3196100	15237000	8163600	11793000	1.40724	3.34308	1.74118	up
mws0264	C12H22O11	D-(+)-Trehalose*	Others	Saccharides and Alcohols	32536	48836	24113	109050	102650	135120	1.38785	3.28786	1.71715	up
Zmgn000447	C3H7O7P	3-Phospho-D-glyceric acid	Others	Saccharides and Alcohols	1720200	2515000	4195000	10631000	10033000	6206300	1.30835	3.18739	1.67237	up
mws1333	C12H22O11	Melibiose*	Others	Saccharides and Alcohols	13026	12357	21931	53796	23493	43244	1.2261	2.54751	1.34909	up
mws0983	C20H39NO2	N-Oleoylethanolamine	Others	Others	726020	740200	1117300	2137600	2139100	1555400	1.35158	2.25742	1.17468	up
ML10181668	C6H11NO2	CYCLOLEUCINE	Others	Others	662680	452120	545680	1077400	1006800	1428200	1.35796	2.11529	1.08086	up
pmn001491	C15H24O5	Dendrobiumane D	Others	Others	159690	127630	160040	377930	219200	338970	1.31644	2.0925	1.06523	up
MA10078408	C7H14N2O3	N-Alpha-Acetyl-Ornithine	Others	Others	36234	26529	50461	15329	10340	19969	1.26913	0.403077	-1.31087	down
Zmpn000095	C6H15O9P	Sorbitol-6-phosphate	Others	Saccharides and Alcohols	324970	304970	222340	99812	74662	118330	1.3924	0.343554	-1.54139	down
HJAP032	C21H36O4	Portulene	Others	Others	13899000	12722000	11384000	2159800	2104100	6824100	1.28219	0.291751	-1.77719	down
pme3313	C6H13O9P	D-Fructose 6-phosphate	Others	Saccharides and Alcohols	124480	84607	103030	22129	15889	20716	1.44703	0.188179	-2.40982	down
Zmhn002334	C16H20O9	6-O-Feruloyl-glucose*	Phenolic acids	Phenolic acids	9	9	9	227960	221680	228460	1.47106	25114.8	14.6163	up
pmn001672	C23H32O15	Furanofructosyl-α-D-(3-mustard acyl)glucoside	Phenolic acids	Phenolic acids	9	9	9	98538	123170	127000	1.47052	12915.1	13.6568	up
pmn001671	C23H32O15	Furanofructosyl-α-D-(6-mustard acyl)glucoside	Phenolic acids	Phenolic acids	9	9	9	145410	72407	65020	1.46981	10475.4	13.3547	up
pmb2936	C28H32O14	Disinapoyl glucoside	Phenolic acids	Phenolic acids	2246.7	3645.6	2876.7	20198	10844	19826	1.42076	5.80089	2.53627	up
pmn001669	C12H14O5	Methyl sinapate	Phenolic acids	Phenolic acids	3424.5	5723.6	10348	27445	48424	22463	1.32671	5.04368	2.33448	up
Hmbp006861	C23H24O9	1,2-O-Diferuloylglycerol*	Phenolic acids	Phenolic acids	2810700	4917600	4421000	17250000	10512000	6898600	1.25505	2.85289	1.51242	up
Lmhn002051	C12H12O8	Vnilloylmalic acid	Phenolic acids	Phenolic acids	9233.4	4117.3	4531.4	14943	11904	23656	1.25328	2.82422	1.49785	up
mws0014	C10H10O4	Ferulic acid*	Phenolic acids	Phenolic acids	5161400	6605000	5609900	16569000	13328000	15888000	1.4462	2.63491	1.39775	up
pmb2620	C11H12O4	3,4-Dimethoxycinnamic acid	Phenolic acids	Phenolic acids	157620	232450	311450	497390	728080	614470	1.33504	2.62279	1.3911	up
mws1212	C11H12O4	Methyl ferulate	Phenolic acids	Phenolic acids	448350	682260	844250	1475900	2110200	1563100	1.34295	2.60737	1.3826	up
pme0422	C10H10O4	Isoferulic Acid*	Phenolic acids	Phenolic acids	5947500	7168100	6578500	17979000	14228000	16296000	1.44902	2.46282	1.30031	up
pmb0478	C21H26O11	Coumarin O-rutinoside	Phenolic acids	Phenolic acids	13274	16305	14823	28411	36510	38453	1.42038	2.32814	1.21918	up
pmp000091	C23H24O9	Glyceryl-1,3-diferulate*	Phenolic acids	Phenolic acids	3409800	6804000	7264200	15374000	12536000	11630000	1.27148	2.26227	1.17777	up
mws0179	C17H20O9	Chlorogenic acid methyl ester	Phenolic acids	Phenolic acids	78066	145840	149900	204190	285380	316920	1.24236	2.15751	1.10937	up
mws1195	C10H10O3	Methyl p-coumarate*	Phenolic acids	Phenolic acids	502560	865110	1042700	1370600	1848500	1952200	1.25142	2.14544	1.10127	up
pmb0751	C16H16O7	Trans-5-O-(4-Coumaroyl)shikimate	Phenolic acids	Phenolic acids	33055	43788	47742	86491	71402	106960	1.35627	2.12588	1.08806	up
pmb2795	C10H10O3	4-Methoxycinnamic acid*	Phenolic acids	Phenolic acids	400360	687970	822970	981520	1386500	1677800	1.20572	2.11679	1.08188	up
pma3724	C17H20O9	1-O-Feruloylquinic acid*	Phenolic acids	Phenolic acids	1317100	1219600	1142200	2416500	2724500	2629500	1.45347	2.11218	1.07873	up
HJN003	C17H22O10	1-O-Sinapoyl-D-glucose*	Phenolic acids	Phenolic acids	456030	598520	522840	1130300	962770	1178700	1.42421	2.07417	1.05253	up
Zmhn001703	C13H16O10	5-O-Galloyl-D-hamamelose*	Phenolic acids	Phenolic acids	1413900	1399900	720790	333860	371570	176580	1.33393	0.249537	-2.00268	down
HmLn000873	C13H16O10	2-O-Galloyl-glucose	Tannins	Tannin	1403500	1390200	745240	339690	309440	193000	1.37099	0.237961	-2.0712	down
Lmfn000604	C13H16O10	6-O-Galloyl-glucose*	Tannins	Tannin	1465900	1300600	787360	353000	309710	167260	1.36038	0.23354	-2.09826	down
HmLn000659	C13H16O10	3-O-Galloyl-glucose*	Tannins	Tannin	1488200	1321600	756150	273360	320980	166790	1.37838	0.213444	-2.22807	down
Hmbn009700	C30H48O3	Betulinic acid*	Terpenoids	Triterpene	20316	21289	24145	77384	65823	72263	1.46248	3.27711	1.71242	up
Lmmn004145	C38H60O10	3-O-(2-O-Acetyl-glucosyl)oleanolic acid	Terpenoids	Triterpene	9642000	16884000	12719000	306240	430300	4417600	1.24744	0.131332	-2.92871	down

## Sheet: Table S3
Table S3: Differential accumulation of metabolites between H570 without Al toxicity and H570 with Al toxicity
Index	Formula	Compounds	Class I	Class II	CAS	Level	H570-1	H570-2	H570-3	H570-1-1	H570-1-2	H570-1-3	VIP(≥0.5)	Fold_Change	Log2FC	Type
pme2292	C4H12N2	Putrescine	Alkaloids	Phenolamine	110-60-1	B	18851000	24616000	27321000	64674000	57727000	48225000	1.27809	2.41038	1.26926	up
pmb1096	C8H7N	Indole	Alkaloids	Plumerane	120-72-9	B	150770	160950	473140	1762100	1257200	1341500	1.2474	5.55615	2.47409	up
pme2693	C6H14N2O	N-Acetylputrescine	Alkaloids	Phenolamine	18233-70-0	B	608870	439460	415430	1494300	1385700	1131300	1.27683	2.74041	1.45439	up
pmb0501	C5H14N4	Agmatine	Alkaloids	Phenolamine	306-60-5	B	597660	457690	355300	1557400	1216700	1170100	1.2552	2.79602	1.48337	up
pmb0374	C5H5N5	2-Aminopurine	Alkaloids	Alkaloids	452-06-2	A	574280	355300	307360	1175400	1139200	1108800	1.24161	2.76764	1.46865	up
pme2268	C7H7NO2	Trigonelline	Alkaloids	Alkaloids	535-83-1	A	140020	146740	76553	432450	279460	231600	1.14171	2.59696	1.37682	up
mws0005	C10H12N2	Tryptamine	Alkaloids	Plumerane	61-54-1	B	728020	484160	1258400	3330900	1252500	1625000	1.03676	2.51293	1.32937	up
XMP3554	C9H9NO4	HMBOA	Alkaloids	Alkaloids	17359-53-4	B	9	9	9	53112	22603	18683	1.32561	3496.22	11.7716	up
pmb0490	C13H18N2O2	p-Coumaroylputrescine	Alkaloids	Phenolamine	34136-53-3	A	178270	243920	650570	3219000	2040900	2156900	1.25245	6.91376	2.78947	up
pmb0323	C13H18N2O3	N-Caffeoylputrescine	Alkaloids	Phenolamine	29554-26-5	B	257270	286770	225280	797980	639940	602070	1.2938	2.65168	1.40691	up
Lmhp002153	C13H18N2O3	N-p-Coumaroylhydroxyputrescine	Alkaloids	Phenolamine	-	A	166650	319630	547300	818470	917390	930150	1.12525	2.57939	1.36703	up
Lmlp003161	C14H20N2O3	Feruloylputrescine	Alkaloids	Phenolamine	-	A	2288700	2619800	3351600	6564700	6020300	5554100	1.28462	2.19599	1.13487	up
Lmmp002013	C14H22N2O3	Dihydroferuloylputrescine	Alkaloids	Phenolamine	-	B	2464000	2782800	3072000	6886300	5870600	5393400	1.3011	2.18184	1.12555	up
pmp001245	C15H22NO4+	Feruloylcholine	Alkaloids	Alkaloids	85927-25-9	B	234740	272610	183580	960130	881410	664170	1.28394	3.62658	1.85861	up
pmb0494	C15H22N2O4	Sinapoylputrescine	Alkaloids	Phenolamine	70185-57-8	B	176770	159770	231610	749560	775870	1188100	1.29152	4.77608	2.25583	up
pmp001214	C16H24NO5+	Sinapine	Alkaloids	Alkaloids	18696-26-9	B	8955.2	9206.6	15928	54632	58505	41871	1.29256	4.54705	2.18493	up
mws1433	C18H19NO4	Feruloyltyramine	Alkaloids	Phenolamine	66648-43-9	A	1043700	1113600	734630	1857800	1373700	2629000	1.08453	2.0265	1.01899	up
pmb0776	C20H20N2O3	N-Feruloyl tryptamine	Alkaloids	Phenolamine	53905-13-8	A	8768.7	5810.4	20402	66331	23195	51082	1.13136	4.01954	2.00703	up
Xmzp003314	C20H25N3O2	Methylergonovine	Alkaloids	Alkaloids	113-42-8	B	14511	14398	19721	5480.2	8587.3	8842.5	1.19629	0.471108	-1.08587	down
pmf0557	C16H11N2NaO4S	Shikonin	Alkaloids	Alkaloids	523-44-4	B	498750	362220	362350	1322600	1309900	1066000	1.29427	3.02333	1.59614	up
Rfmf05381	C14H17NO10	TRIBOA-Glc	Alkaloids	Alkaloids	-	B	14864	9456.6	9975	35901	31738	27517	1.27014	2.77458	1.47227	up
pmb0489	C19H28N2O7	N-Glucosyl-p-coumaroyl putrescine	Alkaloids	Phenolamine	-	B	152400	159850	409630	1928500	1108400	923520	1.23956	5.48626	2.45582	up
pmb0500	C23H26N2O5	N-p-Coumaroyl-N'-feruloylputrescine	Alkaloids	Phenolamine	380302-96-5	B	9	9	9	32722	20015	30617	1.32599	3087.19	11.5921	up
Lmhp005550	C24H28N2O6	N,N'-Diferuloylputrescine	Alkaloids	Phenolamine	42369-86-8	B	13430	12517	7089.5	29946	26252	37453	1.20083	2.83477	1.50323	up
pmp001277	C21H44NO7P	3-{(2-Aminoethoxy)(hydroxy)phosphoryl]oxy}-2-hydroxypropyl palmitate*	Alkaloids	Alkaloids	-	A	2651000	1405900	764880	11644000	11478000	6381400	1.21122	6.11878	2.61324	up
pmn001727	C24H29NO9	N-(4-O-(Glucosyl)-E-feruloyl)-tyramine	Alkaloids	Phenolamine	-	A	35931	21526	26672	83845	46567	52329	1.15304	2.17215	1.11913	up
Rfmf07573	C20H27NO14	DIBOA-Glc-Glc	Alkaloids	Alkaloids	-	B	57304	43869	51247	194450	84907	105610	1.16171	2.5257	1.33668	up
pmp001279	C21H48N3O9P	Bis(N,N-diethylethanaminium)-2-acetamido-1,5-anhydro-2-deoxy-1-[-hydroxy(phosphonato)methyl]-D-glucitol	Alkaloids	Alkaloids	-	A	383420	154850	89800	563070	503970	578100	1.0462	2.61936	1.38921	up
Xmzp009846	C32H41N5O5	A-ergocryptine	Alkaloids	Alkaloids	511-09-1	B	31963	73612	49156	9633	18151	20298	1.17051	0.310746	-1.68619	down
pme2122	C5H9N3	Histamine	Amino acids and derivatives	Amino acids and derivatives	51-45-6	B	962450	500550	582950	1285400	1534800	1406200	1.16557	2.06574	1.04666	up
pme0006	C5H9NO2	L-Proline	Amino acids and derivatives	Amino acids and derivatives	147-85-3	A	11614000	8151800	10338000	25697000	22305000	20892000	1.28644	2.28855	1.19443	up
pme3193	C4H7NO3	N-Acetylglycine	Amino acids and derivatives	Amino acids and derivatives	543-24-8	B	7222.6	5601.4	11452	21650	18376	17965	1.22439	2.38882	1.2563	up
pme0195	C3H7NO2S	L-Cysteine	Amino acids and derivatives	Amino acids and derivatives	52-90-4	A	1709400	1631000	1297400	115090	200150	167530	1.31845	0.104095	-3.26403	down
Rfmb319	C6H11NO2	Pipecolic acid	Amino acids and derivatives	Amino acids and derivatives	4043-87-2	A	265100	567330	828770	7743700	3941500	4139600	1.26873	9.52613	3.25189	up
mws0001	C4H8N2O3	L-Asparagine	Amino acids and derivatives	Amino acids and derivatives	70-47-3	A	1043800	693700	930050	3175400	1757100	1385800	1.12868	2.36858	1.24402	up
pme2527	C5H12N2O2	L-Ornithine	Amino acids and derivatives	Amino acids and derivatives	70-26-8	B	65081	49272	56319	184710	122300	102860	1.22921	2.40151	1.26394	up
pme1210	C5H11NO2S	L-Methionine	Amino acids and derivatives	Amino acids and derivatives	63-68-3	A	837270	377410	710230	2131100	1785100	1460400	1.20772	2.79317	1.4819	up
mws0254	C6H9N3O2	L-Histidine	Amino acids and derivatives	Amino acids and derivatives	71-00-1	A	1061300	1028200	1414300	4885200	2959600	2505000	1.24469	2.95388	1.56261	up
pme2914	C6H10O5	3-Hydroxy-3-methylpentane-1,5-dioic acid	Amino acids and derivatives	Amino acids and derivatives	503-49-1	A	1585800	959970	1628800	3109200	3668100	3502600	1.24713	2.46251	1.30013	up
pme0253	C8H15NO3	N-Acetyl-L-leucine	Amino acids and derivatives	Amino acids and derivatives	1188-21-2	B	32297	34449	40350	78192	66134	115890	1.22502	2.42975	1.28081	up
mws5037	C9H18N2O3	Alanylleucine	Amino acids and derivatives	Amino acids and derivatives	1999-42-4	A	213530	459860	410070	123270	130000	170090	1.15351	0.390748	-1.35569	down
mws0582	C11H19N3O6S	S-(Methyl)glutathione	Amino acids and derivatives	Amino acids and derivatives	2922-56-7	B	75560	74145	60035	35236	40379	26150	1.23351	0.485196	-1.04336	down
pmp000804	C19H20O4	Isobavachalcone D	Flavonoids	Chalcones	-	B	37408	22536	22904	223310	221930	157150	1.30149	7.27103	2.86216	up
HJAP012	C20H18O10	Luteolin-C-pentoside	Flavonoids	Flavonoid	-	B	24536	20656	14822	48138	47193	40758	1.23166	2.26762	1.18118	up
Lmyp002204	C21H22O11	Hovertichoside C	Flavonoids	Sinensetin	-	B	47245	62535	35846	17929	31137	15686	1.13909	0.444646	-1.16927	down
mws1013	C9H6O4	Esculetin	Lignans and Coumarins	Coumarins	305-01-1	B	36851	27578	24590	50034	57926	84582	1.15629	2.16293	1.11299	up
pmb0235	C19H14O5	O-Feruloyl coumarin	Lignans and Coumarins	Coumarins	-	B	52904	53775	99756	309180	253530	224280	1.27865	3.81229	1.93066	up
mws0097	C20H22O6	Pinoresinol*	Lignans and Coumarins	Lignans	487-36-5	B	33822	24273	18386	80139	66091	72895	1.24781	2.86509	1.51858	up
Lmdn004267	C20H22O6	Epipinoresinol*	Lignans and Coumarins	Lignans	24404-50-0	B	29001	24190	17974	73026	55742	56215	1.25145	2.59935	1.37815	up
pma0104	C20H16O7	N-Sinapoylhydroxycoumarin	Lignans and Coumarins	Coumarins	-	B	314970	234690	243080	450390	611900	549670	1.23556	2.0334	1.0239	up
Hmgn004139	C20H22O7	Isohydroxymatairesinol	Lignans and Coumarins	Lignans	-	B	112700	81038	83776	258450	229620	278620	1.29021	2.76271	1.46608	up
pmn001378	C26H32O11	Terpineol mono-glucoside	Lignans and Coumarins	Lignans	-	B	123810	87366	81412	286020	202150	210840	1.24164	2.38906	1.25644	up
Rfmb25702	C28H34O12	Pinoresinol-acetylglucose	Lignans and Coumarins	Lignans	-	B	11318	5911.5	5903.9	20093	15414	15723	1.16167	2.21455	1.14701	up
Rfmb26203	C28H36O13	Syringaresinol-Glucoside	Lignans and Coumarins	Lignans	-	B	181430	123150	116540	283140	299960	281920	1.23273	2.05409	1.0385	up
Hmsn000210	C17H30O2	Methyl 7,10-hexadecadienoate	Lipids	Free fatty acids	-	B	974090	766180	715140	2287600	1880900	2052400	1.29132	2.53355	1.34116	up
mws0362	C17H34O2	Margaric Acid	Lipids	Free fatty acids	506-12-7	B	215810	193080	157930	517910	408610	306410	1.20891	2.17517	1.12113	up
mws0397	C20H30O2	Cis-5,8,11,14,17-Eicosapentaenoic Acid	Lipids	Free fatty acids	10417-94-4	A	42511	66667	46759	109800	178970	150740	1.22069	2.81851	1.49493	up
Lmbn005287	C18H32O4	7S,8S-DiHODE; (9Z,12Z)-(7S,8S)-Dihydroxyoctadeca-9,12-dienoic acid	Lipids	Free fatty acids	143288-65-7	B	25435	15113	12844	33644	55315	38973	1.13712	2.39609	1.26068	up
pmn001691	C18H32O5	9,12,13-Trihyroxy-10,15-octadecadienoic acid	Lipids	Free fatty acids	-	A	2227600	1357200	1494000	4135900	4095100	3578000	1.24765	2.32516	1.21733	up
mws0930	C22H34O2	Docosapentaenoic acid	Lipids	Free fatty acids	24880-45-3	B	27328	26084	18359	16579	3679.9	5589	1.03624	0.360144	-1.47335	down
Lmhp011562	C21H36O4	1-α-Linolenoyl-glycerol*	Lipids	Glycerol ester	-	B	1919600	1059300	1094400	3165800	3548000	3495400	1.22056	2.50637	1.3256	up
pmp001283	C21H38O4	Glyceryl linoleate	Lipids	Glycerol ester	26545-74-4	A	1033500	847390	790620	342440	291200	648670	1.12688	0.479994	-1.05891	down
pmb0296	C21H40O4	MAG(18:1)isomer2*	Lipids	Glycerol ester	-	B	7592300	9268200	8353100	1411300	1171200	2966900	1.25514	0.220096	-2.1838	down
pmb2363	C21H40O4	MAG(18:1)isomer1*	Lipids	Glycerol ester	-	B	7493300	9516100	8045200	1501900	1211100	3146600	1.24628	0.233873	-2.0962	down
Lmhp007836	C21H38NO7P	LysoPE 16:3	Lipids	LPE	-	B	23801	33395	42249	13100	8114.3	10014	1.22406	0.314026	-1.67104	down
pmb0876	C21H44NO7P	LysoPE 16:0*	Lipids	LPE	53862-35-4	A	2546400	1434200	650170	11101000	10584000	5868300	1.19087	5.95005	2.5729	up
Lmhp010162	C22H46NO7P	LysoPE 17:0	Lipids	LPE	-	B	632970	697590	1558300	249100	293350	254390	1.17541	0.275832	-1.85814	down
Lmhp008233	C23H40NO7P	LysoPE 18:4	Lipids	LPE	-	B	68043	53903	38321	13874	6516.2	8753.7	1.26111	0.181846	-2.45921	down
pmb0874	C23H44NO7P	LysoPE 18:2(2n isomer)*	Lipids	LPE	-	A	960510	855550	644840	252250	266660	452280	1.22486	0.394648	-1.34136	down
pmb2260	C23H46NO7P	LysoPC 15:1	Lipids	LPC	-	B	279840	160160	223920	105730	75879	57214	1.18137	0.359717	-1.47507	down
pmb0883	C23H48NO7P	LysoPE 18:0	Lipids	LPE	69747-55-3	B	65491	66476	57153	44079	21873	28215	1.13884	0.497922	-1.00601	down
Lmhp009349	C25H44NO7P	LysoPE 20:4(2n isomer)*	Lipids	LPE	-	B	460860	550850	420290	202890	175890	112650	1.24502	0.343177	-1.54297	down
Lmhp009802	C25H46NO7P	LysoPE 20:3(2n isomer)*	Lipids	LPE	-	B	408080	371710	367370	54441	45010	39522	1.31704	0.121145	-3.04519	down
Lmhp008718	C25H48NO7P	LysoPC 17:2	Lipids	LPC	-	B	359580	470980	274570	130870	109060	195870	1.20884	0.394343	-1.34248	down
Lmhp010757	C25H48NO7P	LysoPE 20:2	Lipids	LPE	-	B	210600	178420	181680	57258	87125	70222	1.2902	0.376038	-1.41105	down
Lmhp010514	C25H48NO7P	LysoPE 20:2(2n isomer)	Lipids	LPE	-	B	191530	188810	187860	61583	90563	67709	1.29546	0.386932	-1.36985	down
Lmhp009590	C25H50NO7P	LysoPC 17:1	Lipids	LPC	-	B	17623000	17640000	11606000	6683100	5233300	5173000	1.26713	0.364621	-1.45553	down
Lmhp010515	C25H52NO7P	LysoPC 17:0(2n isomer)*	Lipids	LPC	-	B	1640600	1592200	829340	507700	481460	853130	1.10004	0.453527	-1.14074	down
Hmqp006235	C21H46N3O9P	LysoPC 18:4	Lipids	LPC	-	B	184160	251070	120800	57102	29400	32078	1.24033	0.213262	-2.2293	down
Lmhp010573	C27H48O9	1-Linoleoylglycerol-glucoside*	Lipids	Glycerol ester	-	B	129660	74285	80269	28649	27748	65541	1.08378	0.429036	-1.22083	down
Lmhp010334	C27H48O9	2-Linoleoylglycerol-glucoside*	Lipids	Glycerol ester	-	B	130620	85338	87285	34487	35258	72282	1.1052	0.46836	-1.09431	down
pmp001251	C26H50NO7P	LysoPC 18:2(isomer)	Lipids	LPC	-	A	3965700	4670500	3086400	1211200	1373200	2720300	1.1367	0.452519	-1.14395	down
pmd0136	C26H54NO7P	LysoPC 18:0(2n isomer)	Lipids	LPC	-	A	1371400	2210200	1174700	572380	492620	1103900	1.07959	0.456006	-1.13288	down
Lmhp010041	C27H46NO7P	LysoPE 22:5	Lipids	LPE	-	B	434330	211350	268650	47153	6159.2	6694.3	1.19426	0.0656289	-3.92952	down
Lmhp010908	C27H54NO7P	LysoPC 19:1	Lipids	LPC	-	B	16743000	15414000	8253600	4494500	3656300	7036100	1.15807	0.375815	-1.41191	down
Lmhp009890	C28H52NO7P	LysoPC 20:3	Lipids	LPC	-	B	2757700	3972800	2445600	314980	236130	210140	1.31205	0.0829601	-3.59144	down
pmd0147	C28H54NO7P	LysoPC 20:2*	Lipids	LPC	-	B	480130	754310	471820	99621	145260	116720	1.30036	0.211926	-2.23837	down
pmd0146	C28H54NO7P	LysoPC 20:2(2n isomer)*	Lipids	LPC	-	B	483220	774760	456840	93220	124720	123530	1.30288	0.199129	-2.32823	down
Lmhp011549	C28H56NO7P	LysoPC 20:1	Lipids	LPC	-	B	534800	569300	268200	151650	218300	213810	1.14382	0.425388	-1.23315	down
Lmhp009368	C30H50NO7P	LysoPC 22:6	Lipids	LPC	-	B	170210	287220	216310	17061	6556.2	17116	1.28625	0.0604583	-4.04791	down
Lmhp009682	C30H52NO7P	LysoPC 22:5(2n isomer)	Lipids	LPC	-	B	104340	274040	107510	18664	18289	18324	1.27871	0.113764	-3.13588	down
Lmhp010099	C30H52NO7P	LysoPC 22:5	Lipids	LPC	-	B	979700	924090	790890	109880	18706	51969	1.24195	0.0670042	-3.8996	down
Lmhp010394	C30H54NO7P	LysoPC 22:4	Lipids	LPC	-	B	289240	415900	211060	27127	13723	12409	1.29463	0.0581303	-4.10457	down
Lmhp008513	C33H56O14	2-γ-Linolenoyl-glycerol-diglucoside*	Lipids	Glycerol ester	-	B	151750	238130	285200	75745	50577	142640	1.07214	0.398415	-1.32766	down
Lmhp008744	C33H56O14	1-α-Linolenoyl-glycerol-diglucoside*	Lipids	Glycerol ester	-	B	161540	267860	233810	69202	47585	142820	1.09707	0.39144	-1.35314	down
pmp001271	C33H58O14	2,3-Dihydroxypropyl-9,12-octadecadienoate-hexose-hexose*	Lipids	Free fatty acids	-	A	363300	497570	456710	88419	82794	303400	1.09346	0.360216	-1.47307	down
Lmhp009384	C33H58O14	1-Linoleoylglycerol-diglucoside*	Lipids	Glycerol ester	-	A	442280	498200	502450	108930	92699	190760	1.26525	0.271939	-1.87864	down
mws0255	C4H5N3O	Cytosine	Nucleotides and derivatives	Nucleotides and derivatives	71-30-7	A	949420	498950	647000	1273700	1535200	1571000	1.1758	2.09028	1.06369	up
pme3968	C6H7N5O	7-Methylguanine	Nucleotides and derivatives	Nucleotides and derivatives	578-76-7	B	29903	20778	17760	42322	40614	62582	1.14667	2.12618	1.08826	up
pme1194	C9H13N3O4	Deoxycytidine	Nucleotides and derivatives	Nucleotides and derivatives	951-77-9	A	736550	315330	357910	894570	1880200	1590800	1.12145	3.09661	1.63069	up
pme3961	C10H13N5O3	Deoxyadenosine*	Nucleotides and derivatives	Nucleotides and derivatives	958-09-8	A	5006700	3228400	2930600	8359600	13836000	12219000	1.21724	3.08217	1.62395	up
mws1715	C10H13N5O3	Cordycepin*	Nucleotides and derivatives	Nucleotides and derivatives	73-03-0	A	58804	48809	46972	103550	173950	164170	1.23733	2.85713	1.51457	up
pme1187	C10H14N2O6	5-Methyluridine	Nucleotides and derivatives	Nucleotides and derivatives	1463-10-1	B	20203	8326.5	10939	28626	29170	22061	1.08305	2.02331	1.01672	up
pme0230	C10H13N5O4	Adenosine*	Nucleotides and derivatives	Nucleotides and derivatives	58-61-7	A	3272900	2152100	2367000	6894700	7085800	6149200	1.27958	2.58338	1.36926	up
pme1184	C10H13N5O4	Deoxyguanosine*	Nucleotides and derivatives	Nucleotides and derivatives	961-07-9	A	2479000	1373200	1428900	2946700	6262300	5222000	1.11995	2.73257	1.45026	up
pme1474	C11H15N5O3S	5'-Deoxy-5'-(methylthio)adenosine	Nucleotides and derivatives	Nucleotides and derivatives	2457-80-9	A	7122200	8106900	9308200	23330000	19269000	19454000	1.30878	2.52893	1.33852	up
mws0884	C10H12N5O6P	Cyclic AMP	Nucleotides and derivatives	Nucleotides and derivatives	60-92-4	B	376400	251630	260310	695250	727590	625150	1.26229	2.30541	1.20502	up
pmb0964	C16H23N5O5	Isopentenyladenine-7-N-glucoside	Nucleotides and derivatives	Nucleotides and derivatives	-	A	341990	273980	214910	1259900	1170900	1052200	1.29692	4.19194	2.06762	up
mws0671	C4H9NO3	L-Homoserine	Organic acids	Organic acids	672-15-1	B	1761100	1336100	1548500	4158900	3178200	2846700	1.26585	2.19209	1.13231	up
pme0243	C5H8O4	Glutaric acid	Organic acids	Organic acids	110-94-1	B	761160	364230	507440	1290900	1256000	1587000	1.20389	2.53174	1.34013	up
mws0341	C6H12O3	(S)-(-)-2-Hydroxyisocaproic acid	Organic acids	Organic acids	13748-90-8	A	262220	237330	398900	1231500	1606600	1212900	1.29842	4.50888	2.17277	up
mws1709	C4H6O5	Malic acid	Organic acids	Organic acids	636-61-3	A	9902700	10459000	10218000	29091000	25607000	29729000	1.3205	2.76088	1.46513	up
Lmbn002862	C7H6O3	3-Hydroxybenzoic Acid	Organic acids	Organic acids	99-06-9	B	5064600	3416700	4903700	24107000	12536000	14063000	1.26518	3.78827	1.92154	up
Zmyn000247	C5H8O5	(S)-2-Hydroxyglutaric Acid	Organic acids	Organic acids	13095-48-2	B	127760	109890	87339	270080	217860	194450	1.23364	2.09973	1.07021	up
mws0639	C7H6O4	2,3-Dihydroxybenzoic Acid*	Organic acids	Organic acids	303-38-8	A	1787100	1457400	1809200	8528100	4820500	6634900	1.29379	3.95423	1.9834	up
pme0282	C8H6O4	Phthalic acid*	Organic acids	Organic acids	88-99-3	B	32971	43224	56481	13547	23449	19705	1.1753	0.427364	-1.22646	down
Lmrn003000	C9H10O3	2-Hydroxy-3-phenylpropanoic acid	Organic acids	Organic acids	828-01-3	B	10948	9146.7	14031	26387	30927	20412	1.24085	2.27764	1.18754	up
mws0154	C7H10O5	Shikimic acid	Organic acids	Organic acids	138-59-0	B	98667	71538	57420	192790	134280	155710	1.18696	2.12094	1.08471	up
mws1189	C6H10O7	D-Galacturonic acid(Gal A)*	Organic acids	Organic acids	685-73-4	B	28339	15060	17276	42414	50044	35463	1.15967	2.1083	1.07608	up
pme1654	C12H18O3	Jasmonic acid	Organic acids	Organic acids	77026-92-7	B	82982	75028	59115	360600	474550	209850	1.25473	4.8129	2.26691	up
Lmmn003323	C16H32O3	2-Hydroxyhexadecanoic acid	Organic acids	Organic acids	764-67-0	A	6517300	5865500	7377000	20552000	18061000	20850000	1.31947	3.00929	1.58942	up
pme2074	C18H29NO4	N-[(-)-Jasmonoyl]-(L)-Isoleucine (JA-L-Ile)	Organic acids	Organic acids	120330-93-0	B	17918	20707	24528	178410	198220	69453	1.25581	7.06353	2.82039	up
mws4052	C4H7NO2	1-Aminocyclopropane-1-carboxylic acid	Others	Others	22059-21-8	A	214040	166680	140780	414340	323340	367730	1.24008	2.11967	1.08384	up
ML10181668	C6H11NO2	CYCLOLEUCINE	Others	Others	52-52-8	A	58114	68032	75667	576960	336390	317700	1.30439	6.09995	2.6088	up
mws0889	C4H8O5	Threonate	Others	Saccharides and Alcohols	70753-61-6	B	144340	97009	113290	269200	215990	296050	1.24526	2.20292	1.13941	up
mws4170	C6H12O6	D-Glucose*	Others	Saccharides and Alcohols	14431-43-7	B	1763600	1188900	1252100	3827800	2922700	3333300	1.26377	2.39828	1.262	up
pma3101	C11H14NO6+	Nicotinate D-ribonucleoside	Others	Vitamin	17720-18-2	A	2203300	1789700	1317100	5328700	3115600	3687100	1.17293	2.28459	1.19194	up
Zmjp00966	C10H13N5O4	Vidarabine	Others	Others	5536-17-4	A	3263600	2037700	2290400	6286500	6487700	5786400	1.26519	2.44485	1.28975	up
YC512118	C18H35NO	Octadecenoic amide	Others	Others	-	A	118050	143890	207900	83114	30500	72395	1.05384	0.395899	-1.3368	down
pmn001491	C15H24O5	Dendrobiumane D	Others	Others	-	B	89098	63967	73444	221140	159560	200810	1.28153	2.56727	1.36024	up
mws0983	C20H39NO2	N-Oleoylethanolamine	Others	Others	111-58-0	B	641970	731400	831650	1589700	1486100	1414700	1.30399	2.03649	1.02608	up
mws0264	C12H22O11	D-(+)-Trehalose*	Others	Saccharides and Alcohols	99-20-7	B	72968	54883	43087	284790	249060	207140	1.2877	4.33485	2.11598	up
mws1080	C12H22O11	Galactinol*	Others	Saccharides and Alcohols	3687-64-7	B	165860	145240	128560	1472600	1185600	1061500	1.31936	8.4604	3.08073	up
mws1333	C12H22O11	Melibiose*	Others	Saccharides and Alcohols	585-99-9	B	17445	17104	27835	96191	83492	77686	1.30508	4.12556	2.04459	up
pme0519	C12H22O11	D-(+)-Sucrose*	Others	Saccharides and Alcohols	57-50-1	B	169900	183510	139150	1163900	866320	843040	1.31184	5.83332	2.54432	up
mws5040	C12H21O11Na	Turanose	Others	Saccharides and Alcohols	547-25-1	A	5258100	4258200	3208600	20019000	17237000	14552000	1.28715	4.07139	2.02552	up
XMP5284	C19H32O7	Blumenol C glucoside	Others	Others	135820-80-3	B	16324	10859	4922	33679	55364	56933	1.16599	4.54683	2.18486	up
pmp001086	C6H6O3	5-Hydroxymethylfurfural	Phenolic acids	Phenolic acids	67-47-0	A	446230	358270	298880	1000600	931220	985730	1.28308	2.64419	1.40283	up
Wmzp000668	C6H6O3	Pyrogallic acid	Phenolic acids	Phenolic acids	-	B	286450	218260	223790	741520	669410	633490	1.30578	2.80634	1.48869	up
mws0921	C9H10O2	p-Coumaryl alcohol	Phenolic acids	Phenolic acids	3690-05-9	B	159310	149260	152000	330360	227080	411950	1.19097	2.10476	1.07366	up
mws0180	C7H6O4	2,5-Dihydroxybenzoic acid*	Phenolic acids	Phenolic acids	490-79-9	A	1905300	1533900	1778200	8883200	5380400	6801000	1.30231	4.03737	2.01342	up
mws0183	C7H6O4	Protocatechuic acid*	Phenolic acids	Phenolic acids	99-50-3	A	1909500	1553300	1973800	9683300	5343200	7210500	1.29311	4.09024	2.03219	up
mws0885	C7H6O4	2,4-Dihydroxybenzoic acid	Phenolic acids	Phenolic acids	89-86-1	A	1838700	1578300	1891400	9068500	5269900	6632200	1.29952	3.95046	1.98202	up
pme0281	C8H6O4	Terephthalic acid*	Phenolic acids	Phenolic acids	100-21-0	B	3533300	4350200	6014200	1114800	2388500	2734100	1.07145	0.448808	-1.15583	down
mws0093	C10H12O3	Coniferyl alcohol	Phenolic acids	Phenolic acids	458-35-5	B	121940	178830	129320	229690	224960	506490	1.01709	2.23474	1.16011	up
pme0422	C10H10O4	Isoferulic Acid*	Phenolic acids	Phenolic acids	537-73-5	A	3558800	2790100	2127300	12008000	9521000	10910000	1.28476	3.82707	1.93624	up
mws0014	C10H10O4	Ferulic acid*	Phenolic acids	Phenolic acids	537-98-4	A	3458000	2574900	2023600	11353000	8765500	10651000	1.28038	3.81921	1.93328	up
mws0027	C9H10O5	Syringic acid	Phenolic acids	Phenolic acids	530-57-4	A	1810200	1509100	1134700	4270600	3612500	4010300	1.26616	2.67027	1.41699	up
pmb2620	C11H12O4	3,4-Dimethoxycinnamic acid	Phenolic acids	Phenolic acids	14737-89-4	A	843690	909470	1138400	3304200	2093900	2217000	1.27043	2.63356	1.39701	up
mws1212	C11H12O4	Methyl ferulate	Phenolic acids	Phenolic acids	2309-07-1	A	2463400	2586000	3119200	9375100	5797200	6426300	1.27424	2.6441	1.40278	up
mws4085	C11H12O5	Sinapic acid	Phenolic acids	Phenolic acids	530-59-6	A	324670	241840	187320	976400	772590	766320	1.27072	3.33671	1.73843	up
pmn001669	C12H14O5	Methyl sinapate	Phenolic acids	Phenolic acids	20733-94-2	B	5522.9	9311.8	9164.7	29394	33432	19799	1.24889	3.44279	1.78358	up
pmn001687	C13H12O8	Cis-Coutaric acid	Phenolic acids	Phenolic acids	27174-07-8	B	61542	45248	46164	119050	110160	92462	1.26369	2.10306	1.07249	up
Lmhn003074	C14H14O8	Feruloylmalic acid	Phenolic acids	Phenolic acids	-	B	100700	65324	40170	177350	160380	178900	1.14859	2.50555	1.32513	up
pmb0751	C16H16O7	Trans-5-O-(4-Coumaroyl)shikimate	Phenolic acids	Phenolic acids	-	B	48509	40819	44818	201120	163220	161110	1.32148	3.917	1.96975	up
Zmhn001703	C13H16O10	5-O-Galloyl-D-hamamelose*	Phenolic acids	Phenolic acids	-	A	15547000	16523000	6959800	1771300	2709600	1934600	1.27033	0.164374	-2.60494	down
Zmhn002334	C16H20O9	6-O-Feruloyl-glucose*	Phenolic acids	Phenolic acids	137887-25-3	A	200010	70181	67912	339300	185560	284940	1.0298	2.39513	1.2601	up
mws0179	C17H20O9	Chlorogenic acid methyl ester	Phenolic acids	Phenolic acids	29708-87-0	B	42144	29909	30655	96339	90120	91137	1.29431	2.70277	1.43444	up
Hmbn005951	C21H20O7	1,3-O-Di-p-Coumaroylglycerol	Phenolic acids	Phenolic acids	-	B	48318	30843	36720	315380	254790	179330	1.30178	6.46784	2.69328	up
HJN003	C17H22O10	1-O-Sinapoyl-D-glucose*	Phenolic acids	Phenolic acids	-	A	170800	140210	134070	510750	428520	369210	1.2992	2.93988	1.55576	up
pma0110	C18H22O10	O-Sinapoyl quinic acid	Phenolic acids	Phenolic acids	-	A	421580	328250	284420	742610	747650	853990	1.25982	2.26662	1.18054	up
pmn001319	C22H22O8	1-O-Feruloyl-3-O-p-Coumaroylglycerol*	Phenolic acids	Phenolic acids	-	A	136970	86831	90026	763880	574690	500050	1.30109	5.85871	2.55058	up
Hmbp006861	C23H24O9	1,2-O-Diferuloylglycerol*	Phenolic acids	Phenolic acids	-	A	7001800	3793300	4388800	38872000	27429000	28783000	1.29727	6.26216	2.64666	up
pmp000091	C23H24O9	Glyceryl-1,3-diferulate*	Phenolic acids	Phenolic acids	83008-46-2	A	9330800	4209300	5914800	34390000	31535000	26935000	1.27696	4.77309	2.25492	up
pmb0478	C21H26O11	Coumarin O-rutinoside	Phenolic acids	Phenolic acids	-	B	13747	10211	9164.1	26645	27022	29390	1.2727	2.5076	1.32631	up
Hmbn002692	C22H30O14	6'-O-Feruloylsucrose	Phenolic acids	Phenolic acids	118230-77-6	A	844530	444340	369850	1566100	1021200	1268500	1.12261	2.32456	1.21696	up
pmb2819	C27H38O19	O-Caffeoyl maltotriose	Phenolic acids	Phenolic acids	-	B	108610	66013	48707	246390	166710	116770	1.0764	2.37259	1.24646	up
Lmfn000604	C13H16O10	6-O-Galloyl-glucose*	Tannins	Tannin	13186-19-1	A	14634000	16196000	6632500	1761900	2775300	1890800	1.26378	0.171585	-2.54301	down
HmLn000873	C13H16O10	2-O-Galloyl-glucose	Tannins	Tannin	-	A	14313000	16298000	7065200	1731000	2732400	1892600	1.27427	0.168701	-2.56746	down
HmLn000659	C13H16O10	3-O-Galloyl-glucose*	Tannins	Tannin	-	A	14467000	15491000	6693100	1639200	2655700	1941600	1.27067	0.170159	-2.55505	down
Hmbn009700	C30H48O3	Betulinic acid*	Terpenoids	Triterpene	472-15-1	B	30778	45805	28444	62167	86060	81035	1.18492	2.18289	1.12624	up
Lmmn004145	C38H60O10	3-O-(2-O-Acetyl-glucosyl)oleanolic acid	Terpenoids	Triterpene	-	A	8755300	9184500	10663000	2338900	1772000	5495700	1.15738	0.335862	-1.57406	down
pmn001505	C41H64O13	Oleanolic acid-3-O-xylose(1→3)-glucuronide	Terpenoids	Triterpene Saponin	-	B	34857	56764	47829	11322	13122	33707	1.07825	0.417003	-1.26187	down

## Sheet: Table S4
Table S4. Venn diagram distribution table of differential metabolites of aluminum tolerant and sensitive varieties before and after aluminum treatment
Index	Formula	Compounds	Class I	Class II	CAS	Level	CK_without_Al_toxicity_vs_CK_with_Al_toxicity	H570_without_Al_toxicity_vs_H570_with_Al_toxicity	CK-1	CK-2	CK-3	H570-1	H570-2	H570-3	CK-1-1	CK-1-2	CK-1-3	H570-1-1	H570-1-2	H570-1-3	cpd_ID	kegg_map
pme2292	C4H12N2	Putrescine	Alkaloids	Phenolamine	110-60-1	B	FALSE	up	23496000	15951000	24365000	18851000	24616000	27321000	34328000	34115000	37487000	64674000	57727000	48225000	C00134	ko00330,ko00472,ko00480,ko00960,ko01100,ko01110,ko02010
mws4052	C4H7NO2	1-Aminocyclopropane-1-carboxylic acid	Others	Others	22059-21-8	A	FALSE	up	152240	169120	123260	214040	166680	140780	222270	273970	295260	414340	323340	367730	C01234	ko00270,ko01100,ko01110
mws0576	C4H8O3	3-Hydroxybutyrate*	Organic acids	Organic acids	300-85-6	A	up	FALSE	7085000	7083700	10358000	7076700	8408200	12065000	20814000	16035000	21996000	19432000	15006000	13537000	--	--
pme2049	C4H8O3	2-Hydroxybutanoic acid*	Organic acids	Organic acids	600-15-7	A	up	FALSE	23577	24464	30740	29122	38360	42868	71850	61884	80867	64617	55010	49918	C05984	ko00640
pme1975	C3H4O4	Malonic acid	Organic acids	Organic acids	141-82-2	A	up	FALSE	7441900	7111400	10771000	7125600	8693100	12506000	21841000	15683000	22024000	19297000	15314000	14271000	C00383	ko00061,ko00240,ko00410,ko01100,ko01212
mws0255	C4H5N3O	Cytosine	Nucleotides and derivatives	Nucleotides and derivatives	71-30-7	A	FALSE	up	1649200	990090	1217300	949420	498950	647000	1320500	1314100	2203100	1273700	1535200	1571000	C00380	ko00240,ko01100
pme2122	C5H9N3	Histamine	Amino acids and derivatives	Amino acids and derivatives	51-45-6	B	FALSE	up	1582200	911780	1085600	962450	500550	582950	1220200	1222600	2050200	1285400	1534800	1406200	C00388	ko00340,ko01100,ko01110
pme0006	C5H9NO2	L-Proline	Amino acids and derivatives	Amino acids and derivatives	147-85-3	A	FALSE	up	18351000	14272000	18991000	11614000	8151800	10338000	31033000	28498000	39031000	25697000	22305000	20892000	C00148	ko00330,ko00332,ko00970,ko01100,ko01110,ko01230,ko02010
pme3193	C4H7NO3	N-Acetylglycine	Amino acids and derivatives	Amino acids and derivatives	543-24-8	B	FALSE	up	20106	11900	17577	7222.6	5601.4	11452	27602	24821	18269	21650	18376	17965	--	--
pmb1096	C8H7N	Indole	Alkaloids	Plumerane	120-72-9	B	up	up	409440	386920	498240	150770	160950	473140	1951300	1486000	1498600	1762100	1257200	1341500	C00463	ko00380,ko00400,ko00402,ko01100,ko01110
mws0671	C4H9NO3	L-Homoserine	Organic acids	Organic acids	672-15-1	B	FALSE	up	1744500	1764600	1812200	1761100	1336100	1548500	2221500	3020500	3819200	4158900	3178200	2846700	C00263	ko00260,ko00270,ko00300,ko00920,ko01100,ko01110,ko01230
pme0195	C3H7NO2S	L-Cysteine	Amino acids and derivatives	Amino acids and derivatives	52-90-4	A	FALSE	down	4219800	4072000	3093000	1709400	1631000	1297400	2811700	1956100	1460500	115090	200150	167530	C00097	ko00260,ko00270,ko00311,ko00332,ko00430,ko00460,ko00480,ko00730,ko00770,ko00920,ko00970,ko01100,ko01110,ko01200,ko01230,ko04122
pmp001086	C6H6O3	5-Hydroxymethylfurfural	Phenolic acids	Phenolic acids	67-47-0	A	FALSE	up	319290	315340	337830	446230	358270	298880	535120	543570	575000	1000600	931220	985730	C11101	--
Wmzp000668	C6H6O3	Pyrogallic acid	Phenolic acids	Phenolic acids	-	B	FALSE	up	180950	193950	158220	286450	218260	223790	287810	332010	355280	741520	669410	633490	--	--
mws0251	C5H6N2O2	Thymine	Nucleotides and derivatives	Nucleotides and derivatives	65-71-4	A	up	FALSE	49221	89160	47596	37133	53440	33957	117310	160000	106750	44991	88113	161910	C00178	ko00240,ko01100
Rfmb319	C6H11NO2	Pipecolic acid	Amino acids and derivatives	Amino acids and derivatives	4043-87-2	A	up	up	9840800	5974200	8271700	265100	567330	828770	16971000	15184000	22103000	7743700	3941500	4139600	C00408	ko00310,ko00960,ko01100,ko01110
ML10181668	C6H11NO2	CYCLOLEUCINE	Others	Others	52-52-8	A	up	up	662680	452120	545680	58114	68032	75667	1077400	1006800	1428200	576960	336390	317700	C03969	--
pme2693	C6H14N2O	N-Acetylputrescine	Alkaloids	Phenolamine	18233-70-0	B	up	up	641060	300110	446270	608870	439460	415430	972990	832110	1114300	1494300	1385700	1131300	C02714	ko00330,ko01100
pmb0501	C5H14N4	Agmatine	Alkaloids	Phenolamine	306-60-5	B	up	up	630750	319870	419840	597660	457690	355300	933700	909450	1197600	1557400	1216700	1170100	C00179	ko00330,ko01100
pme0243	C5H8O4	Glutaric acid	Organic acids	Organic acids	110-94-1	B	FALSE	up	445650	168710	220520	761160	364230	507440	411180	383540	370580	1290900	1256000	1587000	C00489	ko00071,ko00310,ko01100
mws0001	C4H8N2O3	L-Asparagine	Amino acids and derivatives	Amino acids and derivatives	70-47-3	A	FALSE	up	2297600	917730	1182900	1043800	693700	930050	1524300	1201600	1465200	3175400	1757100	1385800	C00152	ko00250,ko00460,ko00970,ko01100,ko01110,ko01230
mws0341	C6H12O3	(S)-(-)-2-Hydroxyisocaproic acid	Organic acids	Organic acids	13748-90-8	A	up	up	628710	1846800	1267300	262220	237330	398900	3187800	2789200	2821200	1231500	1606600	1212900	--	--
pme2527	C5H12N2O2	L-Ornithine	Amino acids and derivatives	Amino acids and derivatives	70-26-8	B	FALSE	up	126490	54285	80637	65081	49272	56319	94712	73284	102360	184710	122300	102860	C00077	ko00220,ko00330,ko00472,ko00480,ko01100,ko01110,ko01210,ko01230,ko02010
mws1709	C4H6O5	Malic acid	Organic acids	Organic acids	636-61-3	A	FALSE	up	9154700	6728300	8516900	9902700	10459000	10218000	10520000	9590900	19456000	29091000	25607000	29729000	--	--
pmb0374	C5H5N5	2-Aminopurine	Alkaloids	Alkaloids	452-06-2	A	FALSE	up	1047100	850100	768530	574280	355300	307360	1299500	1102900	1309200	1175400	1139200	1108800	--	--
mws0889	C4H8O5	Threonate	Others	Saccharides and Alcohols	70753-61-6	B	FALSE	up	134500	137410	132360	144340	97009	113290	123440	145380	157060	269200	215990	296050	C01620	ko00053,ko01100
pme2268	C7H7NO2	Trigonelline	Alkaloids	Alkaloids	535-83-1	A	FALSE	up	311430	217810	201540	140020	146740	76553	403770	292940	575470	432450	279460	231600	C01004	ko00760
Lmbn002862	C7H6O3	3-Hydroxybenzoic Acid	Organic acids	Organic acids	99-06-9	B	FALSE	up	32851000	24907000	34447000	5064600	3416700	4903700	24378000	22042000	33081000	24107000	12536000	14063000	C00587	ko00400
Zmyn000247	C5H8O5	(S)-2-Hydroxyglutaric Acid	Organic acids	Organic acids	13095-48-2	B	up	up	85836	80183	99567	127760	109890	87339	191440	169820	187960	270080	217860	194450	C03196	ko00310,ko01100
pme1210	C5H11NO2S	L-Methionine	Amino acids and derivatives	Amino acids and derivatives	63-68-3	A	FALSE	up	2355700	1949100	2650100	837270	377410	710230	2796200	2929600	4727000	2131100	1785100	1460400	C00073	ko00270,ko00966,ko00970,ko01100,ko01110,ko01210,ko01230
mws0921	C9H10O2	p-Coumaryl alcohol	Phenolic acids	Phenolic acids	3690-05-9	B	FALSE	up	79951	121930	99019	159310	149260	152000	125170	101970	130320	330360	227080	411950	C02646	ko00940,ko01100,ko01110
mws0639	C7H6O4	2,3-Dihydroxybenzoic Acid*	Organic acids	Organic acids	303-38-8	A	FALSE	up	10489000	5919500	8808200	1787100	1457400	1809200	10797000	6015000	11731000	8528100	4820500	6634900	C00196	ko01110
mws0180	C7H6O4	2,5-Dihydroxybenzoic acid*	Phenolic acids	Phenolic acids	490-79-9	A	FALSE	up	10964000	6118400	8858400	1905300	1533900	1778200	11295000	6460100	12106000	8883200	5380400	6801000	C00628	ko00350,ko01100
mws0183	C7H6O4	Protocatechuic acid*	Phenolic acids	Phenolic acids	99-50-3	A	FALSE	up	11576000	6767500	9094800	1909500	1553300	1973800	12008000	6404100	12461000	9683300	5343200	7210500	C00230	ko01100,ko01110
mws0885	C7H6O4	2,4-Dihydroxybenzoic acid	Phenolic acids	Phenolic acids	89-86-1	A	FALSE	up	10773000	6521000	8835600	1838700	1578300	1891400	11924000	6593800	12247000	9068500	5269900	6632200	--	--
mws0254	C6H9N3O2	L-Histidine	Amino acids and derivatives	Amino acids and derivatives	71-00-1	A	FALSE	up	4186100	1958700	3151400	1061300	1028200	1414300	4621100	3701600	4803100	4885200	2959600	2505000	C00135	ko00340,ko00410,ko00970,ko01100,ko01110,ko01230,ko02010
mws0005	C10H12N2	Tryptamine	Alkaloids	Plumerane	61-54-1	B	up	up	1779600	1379600	3801200	728020	484160	1258400	6290500	4063200	9562600	3330900	1252500	1625000	C00398	ko00380,ko00901,ko01100,ko01110
pme2914	C6H10O5	3-Hydroxy-3-methylpentane-1,5-dioic acid	Amino acids and derivatives	Amino acids and derivatives	503-49-1	A	FALSE	up	1585400	720160	984230	1585800	959970	1628800	2017900	1916200	1782400	3109200	3668100	3502600	C03761	--
pme3968	C6H7N5O	7-Methylguanine	Nucleotides and derivatives	Nucleotides and derivatives	578-76-7	B	FALSE	up	62034	46306	41874	29903	20778	17760	51769	53943	52633	42322	40614	62582	C02242	--
pme0281	C8H6O4	Terephthalic acid*	Phenolic acids	Phenolic acids	100-21-0	B	FALSE	down	3118400	3484600	5363700	3533300	4350200	6014200	2623200	3311300	3874800	1114800	2388500	2734100	C06337	ko01100
pme0282	C8H6O4	Phthalic acid*	Organic acids	Organic acids	88-99-3	B	FALSE	down	30051	28966	37925	32971	43224	56481	25383	33644	35606	13547	23449	19705	C01606	ko01100,ko02010
Lmrn003000	C9H10O3	2-Hydroxy-3-phenylpropanoic acid	Organic acids	Organic acids	828-01-3	B	FALSE	up	32972	180230	30440	10948	9146.7	14031	61444	43566	43100	26387	30927	20412	--	--
Lmbn003524	C9H16O3	9-Oxononanoic acid	Organic acids	Organic acids	2553-17-5	B	down	FALSE	1776600	1204400	1123100	488270	419560	295000	734060	485470	632260	384510	548950	379670	C16322	ko00592,ko01110
pme0253	C8H15NO3	N-Acetyl-L-leucine	Amino acids and derivatives	Amino acids and derivatives	1188-21-2	B	FALSE	up	55276	66256	48735	32297	34449	40350	81850	75845	75216	78192	66134	115890	C02710	--
mws0154	C7H10O5	Shikimic acid	Organic acids	Organic acids	138-59-0	B	FALSE	up	50702	124660	79296	98667	71538	57420	142150	87198	106870	192790	134280	155710	C00493	ko00400,ko01100,ko01110,ko01230
MA10078408	C7H14N2O3	N-Alpha-Acetyl-Ornithine	Others	Others	-	B	down	FALSE	36234	26529	50461	38202	47076	55321	15329	10340	19969	30111	29482	23003	C00437	ko00220,ko01100,ko01110,ko01210,ko01230
mws1013	C9H6O4	Esculetin	Lignans and Coumarins	Coumarins	305-01-1	B	up	up	22362	43693	21816	36851	27578	24590	66914	69476	81466	50034	57926	84582	C09263	--
pmb2795	C10H10O3	4-Methoxycinnamic acid*	Phenolic acids	Phenolic acids	830-09-1	A	up	FALSE	400360	687970	822970	509480	602720	742810	981520	1386500	1677800	1253100	753130	833820	--	--
mws1195	C10H10O3	Methyl p-coumarate*	Phenolic acids	Phenolic acids	3943-97-3	A	up	FALSE	502560	865110	1042700	679140	750470	1002300	1370600	1848500	1952200	1706300	1038100	1121200	--	--
mws4170	C6H12O6	D-Glucose*	Others	Saccharides and Alcohols	14431-43-7	B	FALSE	up	1289300	1373700	1131200	1763600	1188900	1252100	1763900	1866600	1977600	3827800	2922700	3333300	C00031	ko00010,ko00030,ko00052,ko00500,ko00520,ko00901,ko01100,ko01110,ko02010,ko04933
mws0093	C10H12O3	Coniferyl alcohol	Phenolic acids	Phenolic acids	458-35-5	B	FALSE	up	68753	155640	86730	121940	178830	129320	133480	175620	155310	229690	224960	506490	C00590	ko00940,ko00998,ko01100,ko01110
Zmgn000447	C3H7O7P	3-Phospho-D-glyceric acid	Others	Saccharides and Alcohols	820-11-1	B	up	FALSE	1720200	2515000	4195000	2332000	3821900	5108400	10631000	10033000	6206300	11330000	6946600	4349900	C00197	ko00010,ko00030,ko00260,ko00270,ko00561,ko00630,ko00710,ko01100,ko01110,ko01200,ko01230
mws1189	C6H10O7	D-Galacturonic acid(Gal A)*	Organic acids	Organic acids	685-73-4	B	FALSE	up	88157	47064	66113	28339	15060	17276	42282	31490	37530	42414	50044	35463	C00333	ko00040,ko00053,ko00520,ko01100,ko02010
pme0422	C10H10O4	Isoferulic Acid*	Phenolic acids	Phenolic acids	537-73-5	A	up	up	5947500	7168100	6578500	3558800	2790100	2127300	17979000	14228000	16296000	12008000	9521000	10910000	C10470	--
mws0014	C10H10O4	Ferulic acid*	Phenolic acids	Phenolic acids	537-98-4	A	up	up	5161400	6605000	5609900	3458000	2574900	2023600	16569000	13328000	15888000	11353000	8765500	10651000	C01494	ko00940,ko01100,ko01110
XMP3554	C9H9NO4	HMBOA	Alkaloids	Alkaloids	17359-53-4	B	up	up	41805	58247	33844	9	9	9	94109	96144	133040	53112	22603	18683	--	--
mws0027	C9H10O5	Syringic acid	Phenolic acids	Phenolic acids	530-57-4	A	FALSE	up	4345900	4560000	5031900	1810200	1509100	1134700	7977300	6258800	6988600	4270600	3612500	4010300	C10833	--
mws5037	C9H18N2O3	Alanylleucine	Amino acids and derivatives	Amino acids and derivatives	1999-42-4	A	FALSE	down	333910	240540	410180	213530	459860	410070	262080	379020	355450	123270	130000	170090	--	--
pmb2620	C11H12O4	3,4-Dimethoxycinnamic acid	Phenolic acids	Phenolic acids	14737-89-4	A	up	up	157620	232450	311450	843690	909470	1138400	497390	728080	614470	3304200	2093900	2217000	--	--
mws1212	C11H12O4	Methyl ferulate	Phenolic acids	Phenolic acids	2309-07-1	A	up	up	448350	682260	844250	2463400	2586000	3119200	1475900	2110200	1563100	9375100	5797200	6426300	--	--
pme1654	C12H18O3	Jasmonic acid	Organic acids	Organic acids	77026-92-7	B	FALSE	up	578330	223920	262370	82982	75028	59115	309190	222130	268410	360600	474550	209850	C08491	ko00592,ko01100,ko01110,ko04075
mws4085	C11H12O5	Sinapic acid	Phenolic acids	Phenolic acids	530-59-6	A	FALSE	up	905370	1092700	1029500	324670	241840	187320	2103700	1468200	1847500	976400	772590	766320	C00482	ko00940,ko01100,ko01110
pme1194	C9H13N3O4	Deoxycytidine	Nucleotides and derivatives	Nucleotides and derivatives	951-77-9	A	FALSE	up	1950000	1099700	982360	736550	315330	357910	1442200	1406400	2540900	894570	1880200	1590800	C00881	ko00240,ko01100,ko02010
pmb0490	C13H18N2O2	p-Coumaroylputrescine	Alkaloids	Phenolamine	34136-53-3	A	up	up	591020	477430	636660	178270	243920	650570	3526500	2265100	3138100	3219000	2040900	2156900	C18326	ko00330,ko01100
pmn001669	C12H14O5	Methyl sinapate	Phenolic acids	Phenolic acids	20733-94-2	B	up	up	3424.5	5723.6	10348	5522.9	9311.8	9164.7	27445	48424	22463	29394	33432	19799	--	--
pmb0323	C13H18N2O3	N-Caffeoylputrescine	Alkaloids	Phenolamine	29554-26-5	B	up	up	865490	539370	559080	257270	286770	225280	1671600	1309100	1978500	797980	639940	602070	C03002	--
Lmhp002153	C13H18N2O3	N-p-Coumaroylhydroxyputrescine	Alkaloids	Phenolamine	-	A	up	up	416180	284130	559700	166650	319630	547300	777200	767740	1059000	818470	917390	930150	--	--
pme3961	C10H13N5O3	Deoxyadenosine*	Nucleotides and derivatives	Nucleotides and derivatives	958-09-8	A	FALSE	up	9553500	6845000	6129900	5006700	3228400	2930600	12081000	12026000	14612000	8359600	13836000	12219000	C00559	ko00230,ko01100,ko02010
mws1715	C10H13N5O3	Cordycepin*	Nucleotides and derivatives	Nucleotides and derivatives	73-03-0	A	FALSE	up	112430	79631	80286	58804	48809	46972	142000	128770	167350	103550	173950	164170	C08431	--
pma3101	C11H14NO6+	Nicotinate D-ribonucleoside	Others	Vitamin	17720-18-2	A	FALSE	up	2717100	1905700	2128100	2203300	1789700	1317100	2891700	2644700	3225900	5328700	3115600	3687100	C05841	ko00760,ko01100
pme1187	C10H14N2O6	5-Methyluridine	Nucleotides and derivatives	Nucleotides and derivatives	1463-10-1	B	FALSE	up	27402	20614	25000	20203	8326.5	10939	27598	27326	48450	28626	29170	22061	--	--
pme3313	C6H13O9P	D-Fructose 6-phosphate	Others	Saccharides and Alcohols	643-13-0	B	down	FALSE	124480	84607	103030	50501	63884	51338	22129	15889	20716	59902	38531	32884	C00085	ko00052,ko00500,ko00710,ko01100,ko01110,ko01200
Zmpn000095	C6H15O9P	Sorbitol-6-phosphate	Others	Saccharides and Alcohols	20479-58-7	B	down	FALSE	324970	304970	222340	165840	203160	152540	99812	74662	118330	140890	100510	109960	C01096	ko00051,ko01100
Lmlp003161	C14H20N2O3	Feruloylputrescine	Alkaloids	Phenolamine	-	A	up	up	7436500	5810500	6410700	2288700	2619800	3351600	19181000	13776000	19294000	6564700	6020300	5554100	C10497	ko00330,ko01100
Lmmp002013	C14H22N2O3	Dihydroferuloylputrescine	Alkaloids	Phenolamine	-	B	up	up	8051000	6361400	7757100	2464000	2782800	3072000	20237000	15183000	21881000	6886300	5870600	5393400	--	--
Hmsn000210	C17H30O2	Methyl 7,10-hexadecadienoate	Lipids	Free fatty acids	-	B	FALSE	up	887450	632130	712900	974090	766180	715140	894570	866430	1445300	2287600	1880900	2052400	--	--
pme0230	C10H13N5O4	Adenosine*	Nucleotides and derivatives	Nucleotides and derivatives	58-61-7	A	FALSE	up	6381100	4846300	4831700	3272900	2152100	2367000	7583400	6238100	7193200	6894700	7085800	6149200	C00212	ko00230,ko01100,ko02010
pme1184	C10H13N5O4	Deoxyguanosine*	Nucleotides and derivatives	Nucleotides and derivatives	961-07-9	A	FALSE	up	6154600	3452100	3555800	2479000	1373200	1428900	5081600	5208900	7207200	2946700	6262300	5222000	C00330	ko00230,ko01100,ko02010
Zmjp00966	C10H13N5O4	Vidarabine	Others	Others	5536-17-4	A	FALSE	up	6152300	4480400	4798200	3263600	2037700	2290400	7413800	5943800	7020600	6286500	6487700	5786400	--	--
mws0362	C17H34O2	Margaric Acid	Lipids	Free fatty acids	506-12-7	B	FALSE	up	214050	135310	209150	215810	193080	157930	514500	340050	208320	517910	408610	306410	--	--
pme0376	C15H12O5	Naringenin	Flavonoids	Dihydroflavone	480-41-1	B	up	FALSE	9	9	32453	9	23675	37416	52720	27275	66760	38902	7666.2	49545	C00509	ko00941,ko00943,ko01100,ko01110
Lmmn003323	C16H32O3	2-Hydroxyhexadecanoic acid	Organic acids	Organic acids	764-67-0	A	up	up	3061600	1768400	2192900	6517300	5865500	7377000	10180000	6880200	9143600	20552000	18061000	20850000	--	--
pmp001245	C15H22NO4+	Feruloylcholine	Alkaloids	Alkaloids	85927-25-9	B	FALSE	up	98541	129850	117580	234740	272610	183580	189100	239940	230780	960130	881410	664170	--	--
YC512118	C18H35NO	Octadecenoic amide	Others	Others	-	A	FALSE	down	51377	122460	103320	118050	143890	207900	206760	69889	171780	83114	30500	72395	--	--
Lmhn002051	C12H12O8	Vnilloylmalic acid	Phenolic acids	Phenolic acids	-	A	up	FALSE	9233.4	4117.3	4531.4	12177	7986.7	10576	14943	11904	23656	17201	11769	16479	--	--
pmn001491	C15H24O5	Dendrobiumane D	Others	Others	-	B	up	up	159690	127630	160040	89098	63967	73444	377930	219200	338970	221140	159560	200810	--	--
pmb0494	C15H22N2O4	Sinapoylputrescine	Alkaloids	Phenolamine	70185-57-8	B	up	up	548590	540080	529200	176770	159770	231610	1112200	928890	1376300	749560	775870	1188100	--	--
pmn001687	C13H12O8	Cis-Coutaric acid	Phenolic acids	Phenolic acids	27174-07-8	B	FALSE	up	61308	48234	42969	61542	45248	46164	77870	63066	91508	119050	110160	92462	--	--
pme1474	C11H15N5O3S	5'-Deoxy-5'-(methylthio)adenosine	Nucleotides and derivatives	Nucleotides and derivatives	2457-80-9	A	FALSE	up	19216000	12768000	15914000	7122200	8106900	9308200	29808000	23901000	25819000	23330000	19269000	19454000	C00170	ko00270,ko00908,ko01100
mws0397	C20H30O2	Cis-5,8,11,14,17-Eicosapentaenoic Acid	Lipids	Free fatty acids	10417-94-4	A	FALSE	up	49378	71189	70801	42511	66667	46759	75167	103990	114920	109800	178970	150740	C06428	ko01040
pmb0496	C15H22N4O3	N-Feruloylagmatine	Alkaloids	Phenolamine	-	A	up	FALSE	4122900	4142100	7722200	1745900	2089200	3780100	12003000	8127700	12481000	5527000	4636100	4334200	C18325	ko00330,ko01100
Lmhn003074	C14H14O8	Feruloylmalic acid	Phenolic acids	Phenolic acids	-	B	FALSE	up	249010	192260	186930	100700	65324	40170	475370	348520	427060	177350	160380	178900	--	--
pmp001214	C16H24NO5+	Sinapine	Alkaloids	Alkaloids	18696-26-9	B	up	up	36996	40474	37205	8955.2	9206.6	15928	96622	94854	89008	54632	58505	41871	C00933	ko00940
pmp000804	C19H20O4	Isobavachalcone D	Flavonoids	Chalcones	-	B	FALSE	up	122600	65213	67135	37408	22536	22904	83434	86259	114740	223310	221930	157150	--	--
Lmbn005287	C18H32O4	7S,8S-DiHODE; (9Z,12Z)-(7S,8S)-Dihydroxyoctadeca-9,12-dienoic acid	Lipids	Free fatty acids	143288-65-7	B	up	up	15506	11808	11581	25435	15113	12844	46213	63716	40620	33644	55315	38973	C07354	ko00591
Rfmb087	C18H32O4	13-Oxo-9-hydroxy-10-octadecenoic acid*	Lipids	Free fatty acids	-	B	down	FALSE	28702000	21010000	18370000	14929000	10276000	9111600	10851000	9801000	11435000	6375600	7530200	7281400	--	--
mws1433	C18H19NO4	Feruloyltyramine	Alkaloids	Phenolamine	66648-43-9	A	FALSE	up	1301000	1555200	1494100	1043700	1113600	734630	3111600	2068100	2349500	1857800	1373700	2629000	C02717	--
pmb0751	C16H16O7	Trans-5-O-(4-Coumaroyl)shikimate	Phenolic acids	Phenolic acids	-	B	up	up	33055	43788	47742	48509	40819	44818	86491	71402	106960	201120	163220	161110	C02947	ko00940,ko00941,ko00945,ko01100,ko01110
mws0582	C11H19N3O6S	S-(Methyl)glutathione	Amino acids and derivatives	Amino acids and derivatives	2922-56-7	B	FALSE	down	89448	81425	59241	75560	74145	60035	47002	38736	34195	35236	40379	26150	C11347	--
pmb0235	C19H14O5	O-Feruloyl coumarin	Lignans and Coumarins	Coumarins	-	B	up	up	321780	234550	485810	52904	53775	99756	1574500	1257900	1530300	309180	253530	224280	--	--
pme3174	C9H14N3O8P	Cytidine 5'-monophosphate(Cytidylic acid)	Nucleotides and derivatives	Nucleotides and derivatives	63-37-6	A	down	FALSE	366540	213000	242930	480580	177430	274210	49794	100840	148610	291770	242920	281850	C00055	ko00240,ko01100
pme2074	C18H29NO4	N-[(-)-Jasmonoyl]-(L)-Isoleucine (JA-L-Ile)	Organic acids	Organic acids	120330-93-0	B	FALSE	up	148700	42059	60389	17918	20707	24528	87970	53647	65987	178410	198220	69453	C18699	ko04075
pme3188	C9H13N2O9P	Uridine 5'-monophosphate	Nucleotides and derivatives	Nucleotides and derivatives	58-97-9	B	down	FALSE	1386500	972750	1065600	553300	272830	330860	260500	332300	580020	140790	250570	275850	C00105	ko00240,ko01100
mws0983	C20H39NO2	N-Oleoylethanolamine	Others	Others	111-58-0	B	up	up	726020	740200	1117300	641970	731400	831650	2137600	2139100	1555400	1589700	1486100	1414700	C20792	--
pmn001691	C18H32O5	9,12,13-Trihyroxy-10,15-octadecadienoic acid	Lipids	Free fatty acids	-	A	up	up	3671500	2933000	3126900	2227600	1357200	1494000	6579400	6030600	8098000	4135900	4095100	3578000	--	--
mws0884	C10H12N5O6P	Cyclic AMP	Nucleotides and derivatives	Nucleotides and derivatives	60-92-4	B	FALSE	up	603240	524140	492240	376400	251630	260310	776690	653080	814750	695250	727590	625150	C00575	ko00230,ko01100
mws0930	C22H34O2	Docosapentaenoic acid	Lipids	Free fatty acids	24880-45-3	B	FALSE	down	30493	14130	22306	27328	26084	18359	20474	2824.2	4644.2	16579	3679.9	5589	C16513	ko01040
Zmhn001703	C13H16O10	5-O-Galloyl-D-hamamelose*	Phenolic acids	Phenolic acids	-	A	down	down	1413900	1399900	720790	15547000	16523000	6959800	333860	371570	176580	1771300	2709600	1934600	--	--
Lmfn000604	C13H16O10	6-O-Galloyl-glucose*	Tannins	Tannin	13186-19-1	A	down	down	1465900	1300600	787360	14634000	16196000	6632500	353000	309710	167260	1761900	2775300	1890800	--	--
HmLn000873	C13H16O10	2-O-Galloyl-glucose	Tannins	Tannin	-	A	down	down	1403500	1390200	745240	14313000	16298000	7065200	339690	309440	193000	1731000	2732400	1892600	--	--
HmLn000659	C13H16O10	3-O-Galloyl-glucose*	Tannins	Tannin	-	A	down	down	1488200	1321600	756150	14467000	15491000	6693100	273360	320980	166790	1639200	2655700	1941600	--	--
pmb0776	C20H20N2O3	N-Feruloyl tryptamine	Alkaloids	Phenolamine	53905-13-8	A	up	up	10422	14053	31253	8768.7	5810.4	20402	75737	43934	61261	66331	23195	51082	--	--
Xmzp003314	C20H25N3O2	Methylergonovine	Alkaloids	Alkaloids	113-42-8	B	FALSE	down	14545	7072.6	14892	14511	14398	19721	7153.3	9885.3	14030	5480.2	8587.3	8842.5	--	--
mws0264	C12H22O11	D-(+)-Trehalose*	Others	Saccharides and Alcohols	99-20-7	B	up	up	32536	48836	24113	72968	54883	43087	109050	102650	135120	284790	249060	207140	C01083	ko00500,ko01100,ko01110,ko02010
mws1080	C12H22O11	Galactinol*	Others	Saccharides and Alcohols	3687-64-7	B	up	up	88625	90779	68725	165860	145240	128560	442690	367210	463140	1472600	1185600	1061500	C01235	ko00052,ko01100
mws1333	C12H22O11	Melibiose*	Others	Saccharides and Alcohols	585-99-9	B	up	up	13026	12357	21931	17445	17104	27835	53796	23493	43244	96191	83492	77686	C05402	ko00052,ko01100,ko02010
pme0519	C12H22O11	D-(+)-Sucrose*	Others	Saccharides and Alcohols	57-50-1	B	up	up	67753	94716	51201	169900	183510	139150	344520	293680	389560	1163900	866320	843040	C00089	ko00052,ko00500,ko01100,ko01110,ko02010
mws0609	C10H12N5O7P	Guanosine 3',5'-cyclic monophosphate	Nucleotides and derivatives	Nucleotides and derivatives	7665-99-8	A	down	FALSE	2514200	706320	621290	1108100	310780	343790	316250	291500	349310	909690	1288000	915220	C00942	ko00230,ko01100
pmb0981	C10H14N5O7P	Adenosine 5'-monophosphate	Nucleotides and derivatives	Nucleotides and derivatives	61-19-8	A	down	FALSE	909130	812080	794260	177070	229710	182270	281430	168980	306800	125820	219960	129730	C00020	ko00230,ko00908,ko01100,ko01110
pmf0557	C16H11N2NaO4S	Shikonin	Alkaloids	Alkaloids	523-44-4	B	up	up	777220	751890	694070	498750	362220	362350	1815400	1510600	2297800	1322600	1309900	1066000	C19371	--
HJAP032	C21H36O4	Portulene	Others	Others	-	B	down	FALSE	13899000	12722000	11384000	10173000	9159800	9594700	2159800	2104100	6824100	4481700	4167200	8297700	--	--
Lmhp011562	C21H36O4	1-α-Linolenoyl-glycerol*	Lipids	Glycerol ester	-	B	FALSE	up	1703900	1441100	1122400	1919600	1059300	1094400	2899200	1944800	2254500	3165800	3548000	3495400	--	--
pmp001283	C21H38O4	Glyceryl linoleate	Lipids	Glycerol ester	26545-74-4	A	down	down	1503200	1409500	1056000	1033500	847390	790620	121010	135780	619810	342440	291200	648670	--	--
pmb0164	C21H38O4	MAG(18:2)isomer1	Lipids	Glycerol ester	-	B	down	FALSE	84371	112320	116640	88771	71879	81457	50761	38296	56480	57829	40401	87673	--	--
Zmhn002334	C16H20O9	6-O-Feruloyl-glucose*	Phenolic acids	Phenolic acids	137887-25-3	A	up	up	9	9	9	200010	70181	67912	227960	221680	228460	339300	185560	284940	--	--
pmb0296	C21H40O4	MAG(18:1)isomer2*	Lipids	Glycerol ester	-	B	down	down	9878600	14408000	12493000	7592300	9268200	8353100	395940	500100	3535400	1411300	1171200	2966900	--	--
pmb2363	C21H40O4	MAG(18:1)isomer1*	Lipids	Glycerol ester	-	B	down	down	9934500	14776000	13248000	7493300	9516100	8045200	390720	517210	3664900	1501900	1211100	3146600	--	--
mws0097	C20H22O6	Pinoresinol*	Lignans and Coumarins	Lignans	487-36-5	B	FALSE	up	55269	51802	68407	33822	24273	18386	41945	26362	40986	80139	66091	72895	C05366	ko00998,ko01110
Lmdn004267	C20H22O6	Epipinoresinol*	Lignans and Coumarins	Lignans	24404-50-0	B	FALSE	up	51924	54177	60514	29001	24190	17974	36280	25799	36750	73026	55742	56215	--	--
Rfmf05381	C14H17NO10	TRIBOA-Glc	Alkaloids	Alkaloids	-	B	FALSE	up	24376	22484	19118	14864	9456.6	9975	28419	38468	34407	35901	31738	27517	--	--
mws5040	C12H21O11Na	Turanose	Others	Saccharides and Alcohols	547-25-1	A	up	up	3441100	3890100	3196100	5258100	4258200	3208600	15237000	8163600	11793000	20019000	17237000	14552000	C19636	--
pmb0964	C16H23N5O5	Isopentenyladenine-7-N-glucoside	Nucleotides and derivatives	Nucleotides and derivatives	-	A	up	up	212290	295980	200990	341990	273980	214910	958330	716350	735550	1259900	1170900	1052200	--	--
pma0104	C20H16O7	N-Sinapoylhydroxycoumarin	Lignans and Coumarins	Coumarins	-	B	FALSE	up	352640	276990	317670	314970	234690	243080	605600	486490	791490	450390	611900	549670	--	--
pma3724	C17H20O9	1-O-Feruloylquinic acid*	Phenolic acids	Phenolic acids	-	A	up	FALSE	1317100	1219600	1142200	478270	502250	416600	2416500	2724500	2629500	807500	474170	974260	--	--
mws0179	C17H20O9	Chlorogenic acid methyl ester	Phenolic acids	Phenolic acids	29708-87-0	B	up	up	78066	145840	149900	42144	29909	30655	204190	285380	316920	96339	90120	91137	--	--
XMP5284	C19H32O7	Blumenol C glucoside	Others	Others	135820-80-3	B	up	up	7038	9183.8	6167.7	16324	10859	4922	75228	34787	119130	33679	55364	56933	--	--
Hmgn004139	C20H22O7	Isohydroxymatairesinol	Lignans and Coumarins	Lignans	-	B	FALSE	up	60984	49949	63929	112700	81038	83776	71646	49583	60919	258450	229620	278620	--	--
Hmbn005951	C21H20O7	1,3-O-Di-p-Coumaroylglycerol	Phenolic acids	Phenolic acids	-	B	FALSE	up	8683.3	9444.3	9686.7	48318	30843	36720	16987	11081	11360	315380	254790	179330	--	--
HJN003	C17H22O10	1-O-Sinapoyl-D-glucose*	Phenolic acids	Phenolic acids	-	A	up	up	456030	598520	522840	170800	140210	134070	1130300	962770	1178700	510750	428520	369210	C01175	ko00940
pmb0489	C19H28N2O7	N-Glucosyl-p-coumaroyl putrescine	Alkaloids	Phenolamine	-	B	up	up	371170	326140	577740	152400	159850	409630	2691300	1901800	2619100	1928500	1108400	923520	--	--
pma0110	C18H22O10	O-Sinapoyl quinic acid	Phenolic acids	Phenolic acids	-	A	FALSE	up	338150	342400	353690	421580	328250	284420	645370	411810	629780	742610	747650	853990	--	--
pmb0500	C23H26N2O5	N-p-Coumaroyl-N'-feruloylputrescine	Alkaloids	Phenolamine	380302-96-5	B	up	up	4266	11540	7287.1	9	9	9	39810	14711	24127	32722	20015	30617	--	--
pmn001319	C22H22O8	1-O-Feruloyl-3-O-p-Coumaroylglycerol*	Phenolic acids	Phenolic acids	-	A	FALSE	up	10081	17230	15460	136970	86831	90026	34062	22697	20066	763880	574690	500050	--	--
HJAP012	C20H18O10	Luteolin-C-pentoside	Flavonoids	Flavonoid	-	B	FALSE	up	13423	32030	57987	24536	20656	14822	54685	47281	70602	48138	47193	40758	--	--
Lmhp005784	C24H28N2O5	p-Coumaroylferuloylcadaverine	Alkaloids	Phenolamine	-	B	up	FALSE	5393.7	4342.9	6802.6	9	3212.9	2838.1	22362	14040	13011	14630	8317.2	12857	--	--
pme2117	C10H15N5O10P2	Adenosine 5'-diphosphate	Nucleotides and derivatives	Nucleotides and derivatives	58-64-0	B	down	FALSE	27759	26326	20419	18776	53981	46530	7606.8	10764	10677	21096	12352	14284	C00008	ko00190,ko00195,ko00230,ko00908,ko01100,ko01110
Lmhp005550	C24H28N2O6	N,N'-Diferuloylputrescine	Alkaloids	Phenolamine	42369-86-8	B	up	up	21268	30752	30912	13430	12517	7089.5	65024	56734	60168	29946	26252	37453	--	--
Hmbp006861	C23H24O9	1,2-O-Diferuloylglycerol*	Phenolic acids	Phenolic acids	-	A	up	up	2810700	4917600	4421000	7001800	3793300	4388800	17250000	10512000	6898600	38872000	27429000	28783000	--	--
pmp000091	C23H24O9	Glyceryl-1,3-diferulate*	Phenolic acids	Phenolic acids	83008-46-2	A	up	up	3409800	6804000	7264200	9330800	4209300	5914800	15374000	12536000	11630000	34390000	31535000	26935000	--	--
Lmhp007836	C21H38NO7P	LysoPE 16:3	Lipids	LPE	-	B	down	down	31481	31070	48760	23801	33395	42249	14710	11025	7240.6	13100	8114.3	10014	--	--
Lmyp002204	C21H22O11	Hovertichoside C	Flavonoids	Sinensetin	-	B	FALSE	down	28806	26133	19844	47245	62535	35846	17067	16682	12193	17929	31137	15686	--	--
pmd0160	C21H44NO7P	LysoPE 16:0(2n isomer)	Lipids	LPE	-	A	down	FALSE	12524000	11744000	11478000	9433700	13674000	11964000	4528600	4490400	3937500	12432000	7768800	7760100	--	--
pmp001277	C21H44NO7P	3-{(2-Aminoethoxy)(hydroxy)phosphoryl]oxy}-2-hydroxypropyl palmitate*	Alkaloids	Alkaloids	-	A	FALSE	up	2715400	1265800	864970	2651000	1405900	764880	6030600	2068000	618130	11644000	11478000	6381400	--	--
pmb0876	C21H44NO7P	LysoPE 16:0*	Lipids	LPE	53862-35-4	A	FALSE	up	2741900	1248100	858630	2546400	1434200	650170	5430300	1822600	534420	11101000	10584000	5868300	--	--
pmb0478	C21H26O11	Coumarin O-rutinoside	Phenolic acids	Phenolic acids	-	B	up	up	13274	16305	14823	13747	10211	9164.1	28411	36510	38453	26645	27022	29390	--	--
Lmhp005872	C25H30N2O6	Diferuloylcadaverine	Alkaloids	Phenolamine	-	B	up	FALSE	17675	15489	19942	16386	13756	11307	33106	37113	40288	21926	11306	24478	--	--
Hmbn009700	C30H48O3	Betulinic acid*	Terpenoids	Triterpene	472-15-1	B	up	up	20316	21289	24145	30778	45805	28444	77384	65823	72263	62167	86060	81035	C08619	--
Lmhp010162	C22H46NO7P	LysoPE 17:0	Lipids	LPE	-	B	down	down	934680	523390	2612600	632970	697590	1558300	116350	111570	95339	249100	293350	254390	--	--
Lmhp008233	C23H40NO7P	LysoPE 18:4	Lipids	LPE	-	B	down	down	77144	30203	48094	68043	53903	38321	9682.1	8269.1	4764.3	13874	6516.2	8753.7	--	--
pmn001727	C24H29NO9	N-(4-O-(Glucosyl)-E-feruloyl)-tyramine	Alkaloids	Phenolamine	-	A	FALSE	up	53518	40135	66004	35931	21526	26672	90327	55698	114840	83845	46567	52329	--	--
Lmhp008801	C23H42NO7P	LysoPE 18:3*	Lipids	LPE	-	B	down	FALSE	14256000	11976000	7282200	10130000	7944300	6330000	1644400	1235000	3247800	4031100	3895700	6646100	--	--
Lmhp008589	C23H42NO7P	LysoPE 18:3(2n isomer)*	Lipids	LPE	-	B	down	FALSE	15955000	12023000	7609700	10491000	9011600	7228100	1944200	1477200	3468400	4304000	4003400	6772000	--	--
pmb0874	C23H44NO7P	LysoPE 18:2(2n isomer)*	Lipids	LPE	-	A	down	down	1298900	996060	616690	960510	855550	644840	84865	56137	144790	252250	266660	452280	--	--
mws0289	C23H46NO7P	LysoPE 18:1*	Lipids	LPE	89576-29-4	A	down	FALSE	39364000	30628000	25034000	24802000	39509000	33704000	10904000	9758100	7302200	14091000	19371000	22809000	--	--
pmb0856	C23H46NO7P	LysoPE 18:1(2n isomer)*	Lipids	LPE	-	A	down	FALSE	41186000	37713000	30649000	28054000	45839000	41695000	12190000	10993000	9069700	16748000	21327000	25454000	--	--
pmb2260	C23H46NO7P	LysoPC 15:1	Lipids	LPC	-	B	down	down	507130	276860	338340	279840	160160	223920	122290	64215	61968	105730	75879	57214	--	--
pmb0883	C23H48NO7P	LysoPE 18:0	Lipids	LPE	69747-55-3	B	down	down	86706	63433	59671	65491	66476	57153	20517	10242	14335	44079	21873	28215	--	--
pmb0880	C23H48NO7P	LysoPE 18:0(2n isomer)	Lipids	LPE	-	B	down	FALSE	235960	195080	169410	167680	286390	234480	63071	56487	44336	93843	133680	157600	--	--
pmb2319	C23H48NO7P	LysoPC 15:0*	Lipids	LPC	-	A	down	FALSE	1318600	1015500	577850	729640	1382800	813140	164850	281310	314030	421090	431450	756650	--	--
pmd0132	C24H50NO7P	LysoPC 16:0(2n isomer)	Lipids	LPC	-	A	down	FALSE	10388000	13595000	5877800	7946000	15137000	8339400	1112000	1461200	2004100	4899200	4858900	6593200	--	--
Lmhp008688	C25H42NO7P	LysoPE 20:5	Lipids	LPE	-	B	down	FALSE	219600	299790	245620	168150	392000	292260	110510	141950	87912	217360	256040	183790	--	--
Lmhp009349	C25H44NO7P	LysoPE 20:4(2n isomer)*	Lipids	LPE	-	B	down	down	635310	302450	342400	460860	550850	420290	120530	127540	116200	202890	175890	112650	--	--
Lmhp009802	C25H46NO7P	LysoPE 20:3(2n isomer)*	Lipids	LPE	-	B	down	down	742570	167980	332800	408080	371710	367370	26005	23021	29133	54441	45010	39522	--	--
Rfmf07573	C20H27NO14	DIBOA-Glc-Glc	Alkaloids	Alkaloids	-	B	FALSE	up	52730	44332	42398	57304	43869	51247	60444	52665	67779	194450	84907	105610	--	--
Lmhp008718	C25H48NO7P	LysoPC 17:2	Lipids	LPC	-	B	down	down	491700	283860	184570	359580	470980	274570	39822	34481	83460	130870	109060	195870	--	--
Lmhp010757	C25H48NO7P	LysoPE 20:2	Lipids	LPE	-	B	down	down	340200	97197	158510	210600	178420	181680	33901	47057	31812	57258	87125	70222	--	--
Lmhp010514	C25H48NO7P	LysoPE 20:2(2n isomer)	Lipids	LPE	-	B	down	down	326550	85470	161590	191530	188810	187860	37587	51117	38456	61583	90563	67709	--	--
Lmhp009590	C25H50NO7P	LysoPC 17:1	Lipids	LPC	-	B	down	down	28289000	10918000	10264000	17623000	17640000	11606000	4019900	4982000	3795600	6683100	5233300	5173000	--	--
pmb2406	C25H52NO7P	LysoPC 17:0*	Lipids	LPC	50930-23-9	B	down	FALSE	293900	355170	123460	241150	569100	259100	27940	51336	117730	182330	190360	309050	--	--
Lmhp010515	C25H52NO7P	LysoPC 17:0(2n isomer)*	Lipids	LPC	-	B	down	down	3237900	1344800	726370	1640600	1592200	829340	205340	202410	344000	507700	481460	853130	--	--
Lmhp009526	C27H46O9	2-γ-Linolenoyl-glycerol-glucoside*	Lipids	Glycerol ester	-	B	down	FALSE	324720	293370	236970	195370	194030	189040	47002	36218	299210	107190	80124	158070	--	--
Hmqp006235	C21H46N3O9P	LysoPC 18:4	Lipids	LPC	-	B	down	down	294370	138680	141270	184160	251070	120800	33676	36094	42852	57102	29400	32078	--	--
Lmhp010573	C27H48O9	1-Linoleoylglycerol-glucoside*	Lipids	Glycerol ester	-	B	down	down	148090	146510	115100	129660	74285	80269	8981.2	11129	59855	28649	27748	65541	--	--
Lmhp010334	C27H48O9	2-Linoleoylglycerol-glucoside*	Lipids	Glycerol ester	-	B	down	down	159720	157220	121210	130620	85338	87285	10373	13640	51385	34487	35258	72282	--	--
pmp001279	C21H48N3O9P	Bis(N,N-diethylethanaminium)-2-acetamido-1,5-anhydro-2-deoxy-1-[-hydroxy(phosphonato)methyl]-D-glucitol	Alkaloids	Alkaloids	-	A	FALSE	up	548460	141600	53590	383420	154850	89800	186680	100060	122540	563070	503970	578100	--	--
pmb0865	C26H48NO7P	LysoPC 18:3(2n isomer)	Lipids	LPC	-	A	down	FALSE	26469000	29077000	14967000	15654000	19024000	12133000	2406400	2032600	7758400	10815000	10476000	17362000	--	--
Hmbn002692	C22H30O14	6'-O-Feruloylsucrose	Phenolic acids	Phenolic acids	118230-77-6	A	FALSE	up	108020	101560	9	844530	444340	369850	479260	355800	376210	1566100	1021200	1268500	--	--
pmp001251	C26H50NO7P	LysoPC 18:2(isomer)	Lipids	LPC	-	A	down	down	6824400	5357000	2848400	3965700	4670500	3086400	230270	193940	878050	1211200	1373200	2720300	--	--
pmn001378	C26H32O11	Terpineol mono-glucoside	Lignans and Coumarins	Lignans	-	B	down	up	115130	140540	111240	123810	87366	81412	60971	40194	66181	286020	202150	210840	--	--
Lmhp010190	C26H52NO7P	LysoPC 18:1(2n isomer)	Lipids	LPC	-	B	down	FALSE	46785000	54998000	31998000	30689000	55566000	38759000	7258700	10869000	13321000	15079000	23873000	34653000	--	--
pmd0136	C26H54NO7P	LysoPC 18:0(2n isomer)	Lipids	LPC	-	A	down	down	2102200	1914200	859400	1371400	2210200	1174700	102220	122770	351000	572380	492620	1103900	--	--
Lmhp010041	C27H46NO7P	LysoPE 22:5	Lipids	LPE	-	B	down	down	550200	108610	247540	434330	211350	268650	49455	6784.3	5285.2	47153	6159.2	6694.3	--	--
Lmhp010908	C27H54NO7P	LysoPC 19:1	Lipids	LPC	-	B	down	down	12446000	10544000	3401200	16743000	15414000	8253600	135570	151000	779970	4494500	3656300	7036100	--	--
Lmhp008742	C28H48NO7P	LysoPC 20:5	Lipids	LPC	162440-04-2	B	down	FALSE	1284900	1513000	1017000	749110	1895600	1059400	398050	630650	494350	797820	991110	827040	--	--
Lmhp009890	C28H52NO7P	LysoPC 20:3	Lipids	LPC	-	B	down	down	6123600	2431100	2568200	2757700	3972800	2445600	145090	131420	243260	314980	236130	210140	--	--
pmd0147	C28H54NO7P	LysoPC 20:2*	Lipids	LPC	-	B	down	down	1092000	392110	357570	480130	754310	471820	64212	105980	94634	99621	145260	116720	--	--
pmd0146	C28H54NO7P	LysoPC 20:2(2n isomer)*	Lipids	LPC	-	B	down	down	1016900	363140	342570	483220	774760	456840	59042	97556	91255	93220	124720	123530	--	--
pmn001672	C23H32O15	Furanofructosyl-α-D-(3-mustard acyl)glucoside	Phenolic acids	Phenolic acids	-	B	up	FALSE	9	9	9	942300	669850	502130	98538	123170	127000	843430	1056400	1117400	--	--
pmn001671	C23H32O15	Furanofructosyl-α-D-(6-mustard acyl)glucoside	Phenolic acids	Phenolic acids	-	B	up	FALSE	9	9	9	837950	674210	523740	145410	72407	65020	910540	1049800	1191800	--	--
Lmhp011549	C28H56NO7P	LysoPC 20:1	Lipids	LPC	-	B	down	down	937380	539850	236780	534800	569300	268200	97664	86136	66949	151650	218300	213810	--	--
Rfmb25702	C28H34O12	Pinoresinol-acetylglucose	Lignans and Coumarins	Lignans	-	B	FALSE	up	15034	10368	15598	11318	5911.5	5903.9	13471	7781.8	10408	20093	15414	15723	--	--
Lmhp009368	C30H50NO7P	LysoPC 22:6	Lipids	LPC	-	B	down	down	267610	228210	217630	170210	287220	216310	16820	4096.5	8483.2	17061	6556.2	17116	--	--
Lmhp009682	C30H52NO7P	LysoPC 22:5(2n isomer)	Lipids	LPC	-	B	down	down	266670	167230	104590	104340	274040	107510	10407	16007	15073	18664	18289	18324	--	--
Lmhp010099	C30H52NO7P	LysoPC 22:5	Lipids	LPC	-	B	down	down	1672000	601460	864710	979700	924090	790890	98164	18927	21907	109880	18706	51969	--	--
Lmhp010394	C30H54NO7P	LysoPC 22:4	Lipids	LPC	-	B	down	down	636760	274430	180860	289240	415900	211060	22202	22436	13752	27127	13723	12409	--	--
Xmzp009846	C32H41N5O5	A-ergocryptine	Alkaloids	Alkaloids	511-09-1	B	down	down	13604	19313	9164.8	31963	73612	49156	2852.1	2233.4	5346.8	9633	18151	20298	--	--
Rfmb26203	C28H36O13	Syringaresinol-Glucoside	Lignans and Coumarins	Lignans	-	B	FALSE	up	51686	43244	48045	181430	123150	116540	69035	42110	49799	283140	299960	281920	--	--
pmb0492	C34H37N3O6	N',N'',N'''-p-Coumaroyl-cinnamoyl-caffeoyl spermidine	Alkaloids	Phenolamine	-	B	up	FALSE	424630	332980	412690	454640	329450	267060	892340	834050	780860	649540	599780	535110	--	--
pmb2936	C28H32O14	Disinapoyl glucoside	Phenolic acids	Phenolic acids	-	B	up	FALSE	2246.7	3645.6	2876.7	2018.1	2072.7	9	20198	10844	19826	12730	20124	13025	--	--
mws0036	C28H34O15	Hesperetin-7-O-rutinoside (Hesperidin)*	Flavonoids	Dihydroflavone	520-26-3	A	down	FALSE	122610	82399	26876	17376	13761	44263	28141	26021	15088	20267	11915	16429	C09755	--
pmp001082	C30H34O17	Sudachiin C	Flavonoids	Flavonoid	101339-35-9	B	up	FALSE	2513.1	5248.1	5512.2	49929	40481	37061	10889	8898	8550	70741	57901	75961	--	--
pmb2819	C27H38O19	O-Caffeoyl maltotriose	Phenolic acids	Phenolic acids	-	B	FALSE	up	9	9	9	108610	66013	48707	9	9	9	246390	166710	116770	--	--
Lmhp008513	C33H56O14	2-γ-Linolenoyl-glycerol-diglucoside*	Lipids	Glycerol ester	-	B	down	down	229830	349720	374320	151750	238130	285200	12926	19014	136730	75745	50577	142640	--	--
Lmhp008744	C33H56O14	1-α-Linolenoyl-glycerol-diglucoside*	Lipids	Glycerol ester	-	B	down	down	249770	394760	282180	161540	267860	233810	9775.7	15156	131010	69202	47585	142820	--	--
pmp001271	C33H58O14	2,3-Dihydroxypropyl-9,12-octadecadienoate-hexose-hexose*	Lipids	Free fatty acids	-	A	down	down	376370	685710	754580	363300	497570	456710	10055	17404	156500	88419	82794	303400	--	--
Lmhp009384	C33H58O14	1-Linoleoylglycerol-diglucoside*	Lipids	Glycerol ester	-	A	down	down	524770	703930	595020	442280	498200	502450	14421	20088	157890	108930	92699	190760	--	--
Lmmn004145	C38H60O10	3-O-(2-O-Acetyl-glucosyl)oleanolic acid	Terpenoids	Triterpene	-	A	down	down	9642000	16884000	12719000	8755300	9184500	10663000	306240	430300	4417600	2338900	1772000	5495700	--	--
pmn001505	C41H64O13	Oleanolic acid-3-O-xylose(1→3)-glucuronide	Terpenoids	Triterpene Saponin	-	B	FALSE	down	36206	67463	50159	34857	56764	47829	9417.3	9	15518	11322	13122	33707	--	--

## Sheet: Table S5
Table S5. Kmeans clustering information of differential metabolites in this study
Index	Sub Class	Formula	Compounds	Class I	Class II	CK-1	CK-2	CK-3	H570-1	H570-2	H570-3	CK-1-1	CK-1-2	CK-1-3	H570-1-1	H570-1-2	H570-1-3
pme0010	1	C3H7NO3	L-Serine	Amino acids and derivatives	Amino acids and derivatives	1515300	1161600	1623000	983260	777720	934080	2152800	1614300	1672800	2024300	1600100	1449600
mws0255	1	C4H5N3O	Cytosine	Nucleotides and derivatives	Nucleotides and derivatives	1649200	990090	1217300	949420	498950	647000	1320500	1314100	2203100	1273700	1535200	1571000
pme2122	1	C5H9N3	Histamine	Amino acids and derivatives	Amino acids and derivatives	1582200	911780	1085600	962450	500550	582950	1220200	1222600	2050200	1285400	1534800	1406200
pme3193	1	C4H7NO3	N-Acetylglycine	Amino acids and derivatives	Amino acids and derivatives	20106	11900	17577	7222.6	5601.4	11452	27602	24821	18269	21650	18376	17965
pmb0374	1	C5H5N5	2-Aminopurine	Alkaloids	Alkaloids	1047100	850100	768530	574280	355300	307360	1299500	1102900	1309200	1175400	1139200	1108800
mws0639	1	C7H6O4	2,3-Dihydroxybenzoic Acid*	Organic acids	Organic acids	10489000	5919500	8808200	1787100	1457400	1809200	10797000	6015000	11731000	8528100	4820500	6634900
mws0180	1	C7H6O4	2,5-Dihydroxybenzoic acid*	Phenolic acids	Phenolic acids	10964000	6118400	8858400	1905300	1533900	1778200	11295000	6460100	12106000	8883200	5380400	6801000
mws0183	1	C7H6O4	Protocatechuic acid*	Phenolic acids	Phenolic acids	11576000	6767500	9094800	1909500	1553300	1973800	12008000	6404100	12461000	9683300	5343200	7210500
mws0885	1	C7H6O4	2,4-Dihydroxybenzoic acid	Phenolic acids	Phenolic acids	10773000	6521000	8835600	1838700	1578300	1891400	11924000	6593800	12247000	9068500	5269900	6632200
mws0254	1	C6H9N3O2	L-Histidine	Amino acids and derivatives	Amino acids and derivatives	4186100	1958700	3151400	1061300	1028200	1414300	4621100	3701600	4803100	4885200	2959600	2505000
Lmbn001467	1	C7H13NO3	5-Acetamidopentanoic Acid	Organic acids	Organic acids	450520	168200	210120	169100	119940	126170	329480	277550	297510	296380	242590	203520
pme3968	1	C6H7N5O	7-Methylguanine	Nucleotides and derivatives	Nucleotides and derivatives	62034	46306	41874	29903	20778	17760	51769	53943	52633	42322	40614	62582
pme1383	1	C8H11NO3	Pyridoxine	Others	Vitamin	7957600	5371100	5225600	3852600	2976900	2644300	7001300	6322700	5990200	5482700	4330900	5180500
Hmtn001288	1	C9H10O4	Methyl-(2,4-dihydroxyphenyl)acetate	Phenolic acids	Phenolic acids	239750	181440	188160	113480	81130	87408	245500	193580	264930	216700	134920	195100
pme1654	1	C12H18O3	Jasmonic acid	Organic acids	Organic acids	578330	223920	262370	82982	75028	59115	309190	222130	268410	360600	474550	209850
pme1194	1	C9H13N3O4	Deoxycytidine	Nucleotides and derivatives	Nucleotides and derivatives	1950000	1099700	982360	736550	315330	357910	1442200	1406400	2540900	894570	1880200	1590800
pme0264	1	C10H14N2O5	Thymidine	Nucleotides and derivatives	Nucleotides and derivatives	1425000	1092400	1054300	743770	552480	547680	1434000	1508000	1660500	1030600	1462200	1187700
pme3732	1	C9H13N3O5	Cytidine	Nucleotides and derivatives	Nucleotides and derivatives	19356000	10964000	15828000	12567000	6180600	7934700	16398000	13976000	27658000	15855000	17670000	18170000
pme1187	1	C10H14N2O6	5-Methyluridine	Nucleotides and derivatives	Nucleotides and derivatives	27402	20614	25000	20203	8326.5	10939	27598	27326	48450	28626	29170	22061
pme0230	1	C10H13N5O4	Adenosine*	Nucleotides and derivatives	Nucleotides and derivatives	6381100	4846300	4831700	3272900	2152100	2367000	7583400	6238100	7193200	6894700	7085800	6149200
pme1184	1	C10H13N5O4	Deoxyguanosine*	Nucleotides and derivatives	Nucleotides and derivatives	6154600	3452100	3555800	2479000	1373200	1428900	5081600	5208900	7207200	2946700	6262300	5222000
Zmjp00966	1	C10H13N5O4	Vidarabine	Others	Others	6152300	4480400	4798200	3263600	2037700	2290400	7413800	5943800	7020600	6286500	6487700	5786400
pme1474	1	C11H15N5O3S	5'-Deoxy-5'-(methylthio)adenosine	Nucleotides and derivatives	Nucleotides and derivatives	19216000	12768000	15914000	7122200	8106900	9308200	29808000	23901000	25819000	23330000	19269000	19454000
Zmgn005057	1	C18H34O3	cis-9,10-Epoxystearic acid	Others	Others	59620	42997	38208	34929	20059	16851	61471	42702	43768	43839	46844	37005
mws0884	1	C10H12N5O6P	Cyclic AMP	Nucleotides and derivatives	Nucleotides and derivatives	603240	524140	492240	376400	251630	260310	776690	653080	814750	695250	727590	625150
Rfmf05381	1	C14H17NO10	TRIBOA-Glc	Alkaloids	Alkaloids	24376	22484	19118	14864	9456.6	9975	28419	38468	34407	35901	31738	27517
pmb0752	1	C17H20O9	3-O-Feruloylquinic acid*	Phenolic acids	Phenolic acids	5121700	4211000	3609300	3019100	2395200	2386400	6914100	4774500	7909200	6500700	3719500	4735200
pmn001727	1	C24H29NO9	N-(4-O-(Glucosyl)-E-feruloyl)-tyramine	Alkaloids	Phenolamine	53518	40135	66004	35931	21526	26672	90327	55698	114840	83845	46567	52329
pmp001287	2	C8H9N	N-Benzylmethylene isomethylamine	Alkaloids	Alkaloids	10515000	6933300	7391500	4793000	3622700	4208400	9114100	7137900	9049800	5334800	5078200	4792800
pme0195	2	C3H7NO2S	L-Cysteine	Amino acids and derivatives	Amino acids and derivatives	4219800	4072000	3093000	1709400	1631000	1297400	2811700	1956100	1460500	115090	200150	167530
ML10197929	2	C4H9N3O2	Creatine	Others	Others	360530	177920	237070	95968	94970	109700	186690	225920	315280	157150	194850	146590
Hmgn001653	2	C7H6O3	3,4-Dihydroxybenzaldehyde	Phenolic acids	Phenolic acids	16222000	11073000	15020000	8129600	6142200	6153600	13490000	11334000	13257000	11400000	8861400	9051800
mws0749	2	C7H6O3	4-Hydroxybenzoic acid*	Phenolic acids	Phenolic acids	20151000	17584000	19789000	10061000	8048600	7933000	17096000	15287000	17365000	13918000	11461000	11743000
Lmbn002862	2	C7H6O3	3-Hydroxybenzoic Acid	Organic acids	Organic acids	32851000	24907000	34447000	5064600	3416700	4903700	24378000	22042000	33081000	24107000	12536000	14063000
Lmbp000123	2	C6H13NO2S	L-Homomethionine	Amino acids and derivatives	Amino acids and derivatives	7264200	3329800	2942300	1321600	2602800	2215000	2533900	2628000	2923600	3826700	2239300	2103100
Lmrn003000	2	C9H10O3	2-Hydroxy-3-phenylpropanoic acid	Organic acids	Organic acids	32972	180230	30440	10948	9146.7	14031	61444	43566	43100	26387	30927	20412
Zmsp001834	2	C8H8O4	2,6-Dimethoxy-1,4-benzoquinone*	Others	Others	2408800	2737600	2066400	1694900	2060300	1610900	1947200	2010600	1554100	982880	1434700	1093900
mws0024	2	C7H6O5	Gallic acid	Tannins	Tannin	426730	386990	367610	106590	54702	42169	479950	297330	448270	102500	97966	143510
Lmbn003524	2	C9H16O3	9-Oxononanoic acid	Organic acids	Organic acids	1776600	1204400	1123100	488270	419560	295000	734060	485470	632260	384510	548950	379670
Lmgn002555	2	C8H14O4	2-Propylglutaric acid	Organic acids	Organic acids	2175900	1580700	1488700	944290	688200	665330	1204000	722970	1012900	1477000	766290	829730
pme2559	2	C6H9NO5	N-Acetylaspartate	Amino acids and derivatives	Amino acids and derivatives	884610	387820	515390	133260	192580	179890	525200	544860	666920	312010	296660	276160
pme1651	2	C10H9NO2	Indole 3-acetic acid (IAA)	Alkaloids	Plumerane	172020	74936	62557	22101	33683	40410	87815	67458	93293	53322	58508	43004
Hmmp001310	2	C11H9NO2	3-Indoleacrylic acid	Alkaloids	Alkaloids	6163100	4295800	4155700	1780200	2089700	2174500	5491900	4689100	5006800	3038100	2862000	2391100
pmn001380	2	C9H16O4	Eucommiol*	Others	Others	8215400	5392700	5627800	3316200	2653300	2456300	5032200	4460500	5394500	2936300	3948000	3171400
mws0237	2	C9H16O4	Anchoic Acid*	Organic acids	Organic acids	1904700	1226700	1336600	764180	592810	602580	1270900	1032300	1292900	718960	939580	784160
Lmmp002080	2	C11H16N2O	BenzoylPutrescine	Alkaloids	Phenolamine	1137000	1084000	807230	446650	500820	447000	874930	667010	890970	675990	617770	588240
mws1189	2	C6H10O7	D-Galacturonic acid(Gal A)*	Organic acids	Organic acids	88157	47064	66113	28339	15060	17276	42282	31490	37530	42414	50044	35463
pme3705	2	C6H10O7	D-Glucoronic acid*	Others	Saccharides and Alcohols	106700	54804	70143	27452	21960	14906	52861	35912	46773	40893	42501	44656
Hmcp001824	2	C12H8N2O2	Ailanindole	Alkaloids	Alkaloids	271360	199980	190120	84239	75494	50907	219480	179390	175660	84941	93260	79993
Lmhn003240	2	C11H10O6	Benzoylmalic acid	Phenolic acids	Phenolic acids	10891000	6211400	6749400	9	9	9	11268000	7895300	8685000	9	9	9
mws1383	2	C12H10N4O2	Lumichrome	Alkaloids	Alkaloids	66612	54204	49172	28497	19117	21413	51685	50223	47191	34937	35000	28342
Lmhn003373	2	C11H10O7	p-Hydroxybenzoylmalic acid	Phenolic acids	Phenolic acids	115090	61982	79937	9	9	9	90373	81920	102330	9	9	9
mws0361	2	C16H30O2	Palmitoleic Acid	Lipids	Free fatty acids	48095	95084	56219	44172	47215	40270	42522	36747	46134	31443	30266	30612
mws0668	2	C10H12N4O6	Xanthosine	Nucleotides and derivatives	Nucleotides and derivatives	784720	575430	512410	327620	252360	264900	627200	481900	487370	361930	304640	238180
pmb2657	2	C10H18N4O6	Argininosuccinic acid	Organic acids	Organic acids	24571	31904	27027	17216	10508	15863	23408	26445	25150	12605	15771	11851
Zmxn001997	2	C13H16O8	Isosalicylic acid O-glycoside*	Phenolic acids	Phenolic acids	541680	539430	384760	166610	135490	145340	518230	443640	483950	315860	230700	184800
Rfmb087	2	C18H32O4	13-Oxo-9-hydroxy-10-octadecenoic acid*	Lipids	Free fatty acids	28702000	21010000	18370000	14929000	10276000	9111600	10851000	9801000	11435000	6375600	7530200	7281400
pme3188	2	C9H13N2O9P	Uridine 5'-monophosphate	Nucleotides and derivatives	Nucleotides and derivatives	1386500	972750	1065600	553300	272830	330860	260500	332300	580020	140790	250570	275850
HJN013	2	C18H19NO5	N-Feruloyl-octopamine*	Others	Others	1405100	1071800	890030	958800	684750	410590	1385900	976530	1184400	544690	488590	550850
pmn001692	2	C18H19NO5	3-O-Acetylhamayne*	Alkaloids	Alkaloids	185550	146620	117150	123890	83246	48830	185270	137530	147070	68246	65108	60654
pmp000232	2	C16H18O8	Cis-3-p-coumaric quinic acid	Phenolic acids	Phenolic acids	207170	363670	325650	86125	112230	182300	281880	229100	255190	123800	114400	120100
pmb0981	2	C10H14N5O7P	Adenosine 5'-monophosphate	Nucleotides and derivatives	Nucleotides and derivatives	909130	812080	794260	177070	229710	182270	281430	168980	306800	125820	219960	129730
pmb0770	2	C20H20N2O4	N-Feruloyl serotonin	Alkaloids	Phenolamine	383330	349480	1157200	119680	188210	195580	597150	236390	431650	603220	170640	205890
mws0011	2	C17H24O9	Syringin	Phenolic acids	Phenolic acids	167230	105730	102360	24675	22868	20017	79875	63637	70791	30592	29389	20877
pmb1912	2	C20H23N7O7	10-Formyltetrahydrofuran	Alkaloids	Alkaloids	6006500	6198200	5141500	2608500	3105100	2334400	4329200	4348600	3666700	2086400	2813800	2717400
HJN010	2	C28H38O14	Ligraminol B	Others	Others	3374500	3099300	3267300	1272600	1002400	931610	2821700	2556900	2893600	1670900	1306900	1405100
mws0036	2	C28H34O15	Hesperetin-7-O-rutinoside (Hesperidin)*	Flavonoids	Dihydroflavone	122610	82399	26876	17376	13761	44263	28141	26021	15088	20267	11915	16429
pmp001253	2	C36H36N2O8	Cannabisin F*	Alkaloids	Phenolamine	311020	248270	208400	203860	188570	137350	206880	160610	146880	93323	119140	118080
pmp001189	2	C38H40N2O10	(5-8)-Hydroxy-1-(hydroxyldimethoxyphenyl)-N2,N3-bis(4-hydroxyphenethyl)-(5-8)-dimethoxy-1,2-dihydronaphthalene-2,3-dicarboxamide	Alkaloids	Alkaloids	44443	48933	40928	10291	15783	9727.8	28674	25270	19770	11357	16123	13460
Wmzp000668	3	C6H6O3	Pyrogallic acid	Phenolic acids	Phenolic acids	180950	193950	158220	286450	218260	223790	287810	332010	355280	741520	669410	633490
pme0243	3	C5H8O4	Glutaric acid	Organic acids	Organic acids	445650	168710	220520	761160	364230	507440	411180	383540	370580	1290900	1256000	1587000
mws0001	3	C4H8N2O3	L-Asparagine	Amino acids and derivatives	Amino acids and derivatives	2297600	917730	1182900	1043800	693700	930050	1524300	1201600	1465200	3175400	1757100	1385800
pme2527	3	C5H12N2O2	L-Ornithine	Amino acids and derivatives	Amino acids and derivatives	126490	54285	80637	65081	49272	56319	94712	73284	102360	184710	122300	102860
mws1709	3	C4H6O5	Malic acid	Organic acids	Organic acids	9154700	6728300	8516900	9902700	10459000	10218000	10520000	9590900	19456000	29091000	25607000	29729000
mws0889	3	C4H8O5	Threonate	Others	Saccharides and Alcohols	134500	137410	132360	144340	97009	113290	123440	145380	157060	269200	215990	296050
mws0567	3	C5H11N3O2	4-Guanidinobutyric acid	Organic acids	Organic acids	1595700	1387800	3588700	1970400	2240400	4188600	2993400	2304500	3070000	5173100	4723500	4780000
mws0921	3	C9H10O2	p-Coumaryl alcohol	Phenolic acids	Phenolic acids	79951	121930	99019	159310	149260	152000	125170	101970	130320	330360	227080	411950
mws4170	3	C6H12O6	D-Glucose*	Others	Saccharides and Alcohols	1289300	1373700	1131200	1763600	1188900	1252100	1763900	1866600	1977600	3827800	2922700	3333300
mws0093	3	C10H12O3	Coniferyl alcohol	Phenolic acids	Phenolic acids	68753	155640	86730	121940	178830	129320	133480	175620	155310	229690	224960	506490
pmb2620	3	C11H12O4	3,4-Dimethoxycinnamic acid	Phenolic acids	Phenolic acids	157620	232450	311450	843690	909470	1138400	497390	728080	614470	3304200	2093900	2217000
mws1212	3	C11H12O4	Methyl ferulate	Phenolic acids	Phenolic acids	448350	682260	844250	2463400	2586000	3119200	1475900	2110200	1563100	9375100	5797200	6426300
Hmsn000210	3	C17H30O2	Methyl 7,10-hexadecadienoate	Lipids	Free fatty acids	887450	632130	712900	974090	766180	715140	894570	866430	1445300	2287600	1880900	2052400
pmp001245	3	C15H22NO4+	Feruloylcholine	Alkaloids	Alkaloids	98541	129850	117580	234740	272610	183580	189100	239940	230780	960130	881410	664170
Zmyn004548	3	C18H28O3	12-Oxo-phytodienoic acid	Lipids	Free fatty acids	86354	62809	73903	120100	64139	85592	98799	92234	79019	163650	162040	120570
pmp000804	3	C19H20O4	Isobavachalcone D	Flavonoids	Chalcones	122600	65213	67135	37408	22536	22904	83434	86259	114740	223310	221930	157150
pme2074	3	C18H29NO4	N-[(-)-Jasmonoyl]-(L)-Isoleucine (JA-L-Ile)	Organic acids	Organic acids	148700	42059	60389	17918	20707	24528	87970	53647	65987	178410	198220	69453
mws1080	3	C12H22O11	Galactinol*	Others	Saccharides and Alcohols	88625	90779	68725	165860	145240	128560	442690	367210	463140	1472600	1185600	1061500
pme0519	3	C12H22O11	D-(+)-Sucrose*	Others	Saccharides and Alcohols	67753	94716	51201	169900	183510	139150	344520	293680	389560	1163900	866320	843040
XMN2362	3	C14H17NO9	DIBOA-O-Hex	Alkaloids	Alkaloids	68236	46979	58563	68642	72442	49883	81608	82188	64946	84725	159510	126500
mws0097	3	C20H22O6	Pinoresinol*	Lignans and Coumarins	Lignans	55269	51802	68407	33822	24273	18386	41945	26362	40986	80139	66091	72895
Lmdn004267	3	C20H22O6	Epipinoresinol*	Lignans and Coumarins	Lignans	51924	54177	60514	29001	24190	17974	36280	25799	36750	73026	55742	56215
Hmgn004139	3	C20H22O7	Isohydroxymatairesinol	Lignans and Coumarins	Lignans	60984	49949	63929	112700	81038	83776	71646	49583	60919	258450	229620	278620
Hmbn005951	3	C21H20O7	1,3-O-Di-p-Coumaroylglycerol	Phenolic acids	Phenolic acids	8683.3	9444.3	9686.7	48318	30843	36720	16987	11081	11360	315380	254790	179330
pmn001319	3	C22H22O8	1-O-Feruloyl-3-O-p-Coumaroylglycerol*	Phenolic acids	Phenolic acids	10081	17230	15460	136970	86831	90026	34062	22697	20066	763880	574690	500050
Hmbp006861	3	C23H24O9	1,2-O-Diferuloylglycerol*	Phenolic acids	Phenolic acids	2810700	4917600	4421000	7001800	3793300	4388800	17250000	10512000	6898600	38872000	27429000	28783000
pmp000091	3	C23H24O9	Glyceryl-1,3-diferulate*	Phenolic acids	Phenolic acids	3409800	6804000	7264200	9330800	4209300	5914800	15374000	12536000	11630000	34390000	31535000	26935000
pmp001277	3	C21H44NO7P	3-{(2-Aminoethoxy)(hydroxy)phosphoryl]oxy}-2-hydroxypropyl palmitate*	Alkaloids	Alkaloids	2715400	1265800	864970	2651000	1405900	764880	6030600	2068000	618130	11644000	11478000	6381400
pmb0876	3	C21H44NO7P	LysoPE 16:0*	Lipids	LPE	2741900	1248100	858630	2546400	1434200	650170	5430300	1822600	534420	11101000	10584000	5868300
pmb0855	3	C24H50NO7P	LysoPC 16:0	Lipids	LPC	12095000	7124500	2257500	11589000	5825800	3390800	4533500	2554000	2750700	15890000	11483000	12342000
Rfmf07573	3	C20H27NO14	DIBOA-Glc-Glc	Alkaloids	Alkaloids	52730	44332	42398	57304	43869	51247	60444	52665	67779	194450	84907	105610
pmp001279	3	C21H48N3O9P	Bis(N,N-diethylethanaminium)-2-acetamido-1,5-anhydro-2-deoxy-1-[-hydroxy(phosphonato)methyl]-D-glucitol	Alkaloids	Alkaloids	548460	141600	53590	383420	154850	89800	186680	100060	122540	563070	503970	578100
pmn001378	3	C26H32O11	Terpineol mono-glucoside	Lignans and Coumarins	Lignans	115130	140540	111240	123810	87366	81412	60971	40194	66181	286020	202150	210840
pmb2833	3	C23H30O14	3-O-Feruloylquinic acid glucoside*	Phenolic acids	Phenolic acids	443330	345640	315110	585110	441780	452600	528600	382940	489880	1097700	582590	895610
pmb2554	3	C23H30O14	5-O-Feruloyl quinic acid glucoside*	Phenolic acids	Phenolic acids	410500	314390	328710	605240	518110	486890	570670	454650	466700	1182100	675000	965060
Rfmb25702	3	C28H34O12	Pinoresinol-acetylglucose	Lignans and Coumarins	Lignans	15034	10368	15598	11318	5911.5	5903.9	13471	7781.8	10408	20093	15414	15723
pmb0782	4	C5H11N	Piperidine	Alkaloids	Alkaloids	5983800	4771400	4289600	2738000	2158700	3039800	6253600	4724900	7518300	3513500	3618100	3062700
pme3011	4	C4H9NO2	γ-Aminobutyric acid*	Organic acids	Organic acids	2538900	2719200	3494100	1365400	905580	850100	4914100	4326700	4698400	2068000	2131700	1359800
mws0256	4	C5H11NO2	L-Valine*	Amino acids and derivatives	Amino acids and derivatives	4426300	3290000	3418000	1901600	1553100	1890500	4772200	4039800	5434000	3435900	2797100	2396200
mws0147	4	C5H10O3	3-Hydroxy-3-methyl butyric acid	Organic acids	Organic acids	618210	302370	346930	299490	154460	219110	940680	716200	615340	488570	459320	361960
Rfmb319	4	C6H11NO2	Pipecolic acid	Amino acids and derivatives	Amino acids and derivatives	9840800	5974200	8271700	265100	567330	828770	16971000	15184000	22103000	7743700	3941500	4139600
ML10181668	4	C6H11NO2	CYCLOLEUCINE	Others	Others	662680	452120	545680	58114	68032	75667	1077400	1006800	1428200	576960	336390	317700
pma3649	4	C5H9NO3	5-Aminolevulinate	Alkaloids	Alkaloids	22385000	17034000	18294000	9291400	9334700	9137100	24365000	18535000	22625000	15308000	13330000	11766000
pmp001198	4	C6H13NO2	6-Deoxyfagomine*	Alkaloids	Alkaloids	8399300	7490600	6600100	4326500	3253700	4428900	9573900	7412200	10709000	5832300	5570200	4670400
mws0258	4	C6H13NO2	L-Isoleucine*	Amino acids and derivatives	Amino acids and derivatives	1807800	1526200	1356600	1010500	663610	926960	2087200	1521300	2279600	1281700	1268800	948190
mws0341	4	C6H12O3	(S)-(-)-2-Hydroxyisocaproic acid	Organic acids	Organic acids	628710	1846800	1267300	262220	237330	398900	3187800	2789200	2821200	1231500	1606600	1212900
Lmbp000659	4	C8H9NO	2-Phenylacetamide	Alkaloids	Alkaloids	2869300	2274300	2115000	1652400	1342600	1426400	3526400	2843800	3376000	1754100	1813800	1648400
pme1210	4	C5H11NO2S	L-Methionine	Amino acids and derivatives	Amino acids and derivatives	2355700	1949100	2650100	837270	377410	710230	2796200	2929600	4727000	2131100	1785100	1460400
mws0005	4	C10H12N2	Tryptamine	Alkaloids	Plumerane	1779600	1379600	3801200	728020	484160	1258400	6290500	4063200	9562600	3330900	1252500	1625000
mws1346	4	C6H11NO4	DL-2-Aminoadipic acid	Alkaloids	Alkaloids	510690	361810	522350	203220	272720	322560	656630	432960	532500	407790	338720	302920
pme1419	4	C6H13NO2S	Methionine methyl ester	Amino acids and derivatives	Amino acids and derivatives	96095	77938	142280	43613	83234	87727	138950	173340	238060	112350	61650	75353
pme2024	4	C10H12N2O	Serotonin*	Alkaloids	Plumerane	36944000	61715000	124270000	26188000	38671000	69353000	106470000	74891000	101210000	75663000	40984000	59399000
pmb0468	4	C6H11NO3S	N-Formylmethionine	Amino acids and derivatives	Amino acids and derivatives	1119300	2015900	5496500	828400	1173800	2488000	4666400	2566400	4118300	2446000	1302800	2388100
mws0250	4	C9H11NO3	L-Tyrosine	Amino acids and derivatives	Amino acids and derivatives	1518700	1230600	1123300	916780	668550	740390	1901100	1452800	1790800	1018900	1042100	903590
XMP3554	4	C9H9NO4	HMBOA	Alkaloids	Alkaloids	41805	58247	33844	9	9	9	94109	96144	133040	53112	22603	18683
mws0027	4	C9H10O5	Syringic acid	Phenolic acids	Phenolic acids	4345900	4560000	5031900	1810200	1509100	1134700	7977300	6258800	6988600	4270600	3612500	4010300
Wmhn001652	4	C11H8O4	3-Methoxy-juglone	Quinones	Quinones	17289000	12215000	11304000	4170300	5004000	6046800	18949000	15172000	17022000	8457000	7879200	6250900
mws0282	4	C11H12N2O2	L-Tryptophan	Amino acids and derivatives	Amino acids and derivatives	20444000	14834000	15097000	4983200	6192800	7158600	21179000	19536000	21855000	9975400	9837200	7551700
pmb0818	4	C11H11NO3	Methoxyindoleacetic acid	Alkaloids	Plumerane	1162600	790260	781720	299270	358540	352230	1169500	1004300	1052800	582170	537790	405630
mws0677	4	C12H14N2O2	N-Acetyl-5-hydroxytryptamine	Alkaloids	Alkaloids	427430	342710	459410	238050	241140	303120	445360	598660	729230	300710	253690	295400
mws4085	4	C11H12O5	Sinapic acid	Phenolic acids	Phenolic acids	905370	1092700	1029500	324670	241840	187320	2103700	1468200	1847500	976400	772590	766320
pmb0323	4	C13H18N2O3	N-Caffeoylputrescine	Alkaloids	Phenolamine	865490	539370	559080	257270	286770	225280	1671600	1309100	1978500	797980	639940	602070
Lmlp003161	4	C14H20N2O3	Feruloylputrescine	Alkaloids	Phenolamine	7436500	5810500	6410700	2288700	2619800	3351600	19181000	13776000	19294000	6564700	6020300	5554100
Lmmp002013	4	C14H22N2O3	Dihydroferuloylputrescine	Alkaloids	Phenolamine	8051000	6361400	7757100	2464000	2782800	3072000	20237000	15183000	21881000	6886300	5870600	5393400
Lmhn002926	4	C13H12O7	p-Coumaroylmalic acid	Phenolic acids	Phenolic acids	6862300	5512700	4806800	9	9	9	10334000	6897800	8194700	9	9	9
Lmhp002501	4	C14H20N2O4	N-Feruloylhydroxyputrescine	Alkaloids	Phenolamine	2475500	1858400	1845900	1585700	2179200	1275600	2736800	5437400	3776800	1015300	2052500	1514900
pme1178	4	C10H13N5O5	Guanosine	Nucleotides and derivatives	Nucleotides and derivatives	13282000	9919600	10252000	7233600	4523200	4881100	11519000	10122000	15237000	7287200	8798300	9175900
pmb0197	4	C11H15N5O5	N7-Methylguanosine	Nucleotides and derivatives	Nucleotides and derivatives	1228400	808870	790640	748270	252120	291290	1210600	1054000	1777700	742370	853240	868000
pmb0496	4	C15H22N4O3	N-Feruloylagmatine	Alkaloids	Phenolamine	4122900	4142100	7722200	1745900	2089200	3780100	12003000	8127700	12481000	5527000	4636100	4334200
Lmhn003074	4	C14H14O8	Feruloylmalic acid	Phenolic acids	Phenolic acids	249010	192260	186930	100700	65324	40170	475370	348520	427060	177350	160380	178900
Lmhn001477	4	C13H12O9	Caffeoyltartaric acid (Caftaric acid)	Phenolic acids	Phenolic acids	11310	8681.3	7567.5	7291	4093.3	4126.4	16397	12520	19706	7591.3	9022	8439.4
pmb2871	4	C13H16O9	2,5-Dihydroxy benzoic acid O-glucoside*	Phenolic acids	Phenolic acids	3408900	3089000	3096200	1259600	1596600	1907000	5665400	5247800	5161200	2579100	3594800	2117000
Lmfp001509	4	C13H16O9	1-O-Galloyl-rhamnose	Tannins	Tannin	22063	12200	18186	14411	13493	12429	33620	22662	29563	20074	15459	16075
pmn001367	4	C13H16O9	Protocatechuic acid-4-O-glucoside*	Phenolic acids	Phenolic acids	3019600	3728400	3498500	1606600	1938400	2382900	6356400	6411700	5735400	3528200	4107000	2332500
pmb0235	4	C19H14O5	O-Feruloyl coumarin	Lignans and Coumarins	Coumarins	321780	234550	485810	52904	53775	99756	1574500	1257900	1530300	309180	253530	224280
pmn001691	4	C18H32O5	9,12,13-Trihyroxy-10,15-octadecadienoic acid	Lipids	Free fatty acids	3671500	2933000	3126900	2227600	1357200	1494000	6579400	6030600	8098000	4135900	4095100	3578000
pmn001694	4	C18H34O5	9,10,13-Trihyroxy-11-octadecadienoic acid	Lipids	Free fatty acids	8518300	6311100	6203000	5934800	3396400	3487000	10370000	9295000	12283000	6928800	7678600	6278700
Lmgp003270	4	C16H16O10	Scopoletin-O-Glucuronide	Lignans and Coumarins	Coumarins	1054800	990460	997010	421080	406410	441620	1856100	1766300	1571400	600360	553290	658710
pma3724	4	C17H20O9	1-O-Feruloylquinic acid*	Phenolic acids	Phenolic acids	1317100	1219600	1142200	478270	502250	416600	2416500	2724500	2629500	807500	474170	974260
mws0179	4	C17H20O9	Chlorogenic acid methyl ester	Phenolic acids	Phenolic acids	78066	145840	149900	42144	29909	30655	204190	285380	316920	96339	90120	91137
HJN003	4	C17H22O10	1-O-Sinapoyl-D-glucose*	Phenolic acids	Phenolic acids	456030	598520	522840	170800	140210	134070	1130300	962770	1178700	510750	428520	369210
Lmzn001582	4	C18H28O9	5'-Glucosyloxyjasmanic acid	Phenolic acids	Phenolic acids	120870	133350	103690	79923	88766	47388	210800	196710	195370	94817	108520	92145
pmp001248	4	C20H30NO9+	Caffeoylcholine 5-glucoside	Alkaloids	Alkaloids	9595.5	10909	14010	6630.7	5398.8	10267	20714	20618	17387	7323.7	9088	7657.9
Lmhp005550	4	C24H28N2O6	N,N'-Diferuloylputrescine	Alkaloids	Phenolamine	21268	30752	30912	13430	12517	7089.5	65024	56734	60168	29946	26252	37453
Lmhp005872	4	C25H30N2O6	Diferuloylcadaverine	Alkaloids	Phenolamine	17675	15489	19942	16386	13756	11307	33106	37113	40288	21926	11306	24478
Hmln002355	4	C27H34O12	5'-Methoxymatairesinoside	Lignans and Coumarins	Lignans	263400	196040	239970	9	9	9	358910	270890	288430	9	9	9
pme3227	4	C27H30O14	Vitexin-2''-O-rhamnoside	Flavonoids	Flavonoid carbonoside	74323	15726	6212.7	49095	12117	11959	23159	58945	34074	15686	15916	15387
pme0282	5	C8H6O4	Phthalic acid*	Organic acids	Organic acids	30051	28966	37925	32971	43224	56481	25383	33644	35606	13547	23449	19705
MA10078408	5	C7H14N2O3	N-Alpha-Acetyl-Ornithine	Others	Others	36234	26529	50461	38202	47076	55321	15329	10340	19969	30111	29482	23003
mws0277	5	C7H12O6	Quinic Acid	Organic acids	Organic acids	3775700	3214900	3008400	7876200	5657800	4701700	2348100	2243200	3640700	6578600	3893300	5533900
pme3472	5	C12H16O7	Arbutin	Others	Others	743250	634670	453930	1456400	1696300	1153100	508640	560720	360630	893940	1217600	903950
YC512118	5	C18H35NO	Octadecenoic amide	Others	Others	51377	122460	103320	118050	143890	207900	206760	69889	171780	83114	30500	72395
pmb3081	5	C6H11PO11	Glucarate O-Phosphoric acid	Others	Saccharides and Alcohols	394470	584190	443170	2272400	2810900	1664700	286070	302630	307760	1257900	970770	1185100
pme3163	5	C7H15O10P	D-Sedoheptuiose 7-phosphate	Others	Saccharides and Alcohols	329280	447710	371040	1363900	2018800	1845300	197370	304020	238090	1298200	788460	977270
pme0460	5	C15H14O6	Epicatechin	Flavonoids	Flavanols	84660	32565	26553	106850	45256	9	7700.1	28766	21394	43920	76930	35148
Lmyp010328	5	C20H30O3	2-Oxokovalenic acid	Terpenoids	Ditepenoids	9	9	306150	82916	68232	349180	9	9	9	43948	102600	117400
pme3174	5	C9H14N3O8P	Cytidine 5'-monophosphate(Cytidylic acid)	Nucleotides and derivatives	Nucleotides and derivatives	366540	213000	242930	480580	177430	274210	49794	100840	148610	291770	242920	281850
Zmhn001703	5	C13H16O10	5-O-Galloyl-D-hamamelose*	Phenolic acids	Phenolic acids	1413900	1399900	720790	15547000	16523000	6959800	333860	371570	176580	1771300	2709600	1934600
Lmfn000604	5	C13H16O10	6-O-Galloyl-glucose*	Tannins	Tannin	1465900	1300600	787360	14634000	16196000	6632500	353000	309710	167260	1761900	2775300	1890800
HmLn000873	5	C13H16O10	2-O-Galloyl-glucose	Tannins	Tannin	1403500	1390200	745240	14313000	16298000	7065200	339690	309440	193000	1731000	2732400	1892600
HmLn000659	5	C13H16O10	3-O-Galloyl-glucose*	Tannins	Tannin	1488200	1321600	756150	14467000	15491000	6693100	273360	320980	166790	1639200	2655700	1941600
Xmzp003314	5	C20H25N3O2	Methylergonovine	Alkaloids	Alkaloids	14545	7072.6	14892	14511	14398	19721	7153.3	9885.3	14030	5480.2	8587.3	8842.5
Lmmn000774	5	C15H20O9	Dihydrocaffeoylglucose	Phenolic acids	Phenolic acids	94610	70038	37357	93451	93270	61500	52284	39649	28602	60448	73449	71958
pmb0808	5	C16H16O9	Esculetin 6-O-quinic acid	Lignans and Coumarins	Coumarins	148670	132230	89899	188910	176560	126690	86425	75761	56284	105970	117450	119950
pme2117	5	C10H15N5O10P2	Adenosine 5'-diphosphate	Nucleotides and derivatives	Nucleotides and derivatives	27759	26326	20419	18776	53981	46530	7606.8	10764	10677	21096	12352	14284
Lmlp003201	5	C21H20O10	Apigenin-8-C-glucoside	Flavonoids	Flavonoid carbonoside	9	9	9	24166	25184	17994	9	9	9	7684.3	15527	10691
Cmzn005251	5	C21H22O10	6-O-Caffeoylarbutin	Phenolic acids	Phenolic acids	11991	11592	15710	29024	24758	57092	14755	6531	8370.8	40636	22869	23627
Lmhp008885	5	C20H42NO7P	LysoPE 15:0(2n isomer)	Lipids	LPE	4803800	4832000	7077600	5622600	6413800	8042000	2921100	4390500	2206600	4517600	4963000	4296300
Lmhp009187	5	C20H42NO7P	LysoPE 15:0	Lipids	LPE	4965700	4998300	6889800	5323600	6374400	8033500	2923900	4558300	2043900	4300500	4881900	4189100
Lmyp002204	5	C21H22O11	Hovertichoside C	Flavonoids	Sinensetin	28806	26133	19844	47245	62535	35846	17067	16682	12193	17929	31137	15686
Lmhp008688	5	C25H42NO7P	LysoPE 20:5	Lipids	LPE	219600	299790	245620	168150	392000	292260	110510	141950	87912	217360	256040	183790
pmb2406	5	C25H52NO7P	LysoPC 17:0*	Lipids	LPC	293900	355170	123460	241150	569100	259100	27940	51336	117730	182330	190360	309050
Lmhp010908	5	C27H54NO7P	LysoPC 19:1	Lipids	LPC	12446000	10544000	3401200	16743000	15414000	8253600	135570	151000	779970	4494500	3656300	7036100
Xmzp009846	5	C32H41N5O5	A-ergocryptine	Alkaloids	Alkaloids	13604	19313	9164.8	31963	73612	49156	2852.1	2233.4	5346.8	9633	18151	20298
Hmgp002953	5	C29H32O17	Tricin-O-glucuronate-O-rhamnoside	Flavonoids	Flavonoid	15927	7624.7	5298.2	152480	132070	80231	13478	10574	6399.2	34857	77728	116030
pmn001369	5	C32H42O17	1-Hydroxypineolin Diglucoside	Lignans and Coumarins	Lignans	9	9	9	98079	112800	92728	9	9	8893.6	47450	71160	65498
mws0576	6	C4H8O3	3-Hydroxybutyrate*	Organic acids	Organic acids	7085000	7083700	10358000	7076700	8408200	12065000	20814000	16035000	21996000	19432000	15006000	13537000
pme2049	6	C4H8O3	2-Hydroxybutanoic acid*	Organic acids	Organic acids	23577	24464	30740	29122	38360	42868	71850	61884	80867	64617	55010	49918
pme1975	6	C3H4O4	Malonic acid	Organic acids	Organic acids	7441900	7111400	10771000	7125600	8693100	12506000	21841000	15683000	22024000	19297000	15314000	14271000
pme0006	6	C5H9NO2	L-Proline	Amino acids and derivatives	Amino acids and derivatives	18351000	14272000	18991000	11614000	8151800	10338000	31033000	28498000	39031000	25697000	22305000	20892000
pmb1096	6	C8H7N	Indole	Alkaloids	Plumerane	409440	386920	498240	150770	160950	473140	1951300	1486000	1498600	1762100	1257200	1341500
mws0251	6	C5H6N2O2	Thymine	Nucleotides and derivatives	Nucleotides and derivatives	49221	89160	47596	37133	53440	33957	117310	160000	106750	44991	88113	161910
pme2268	6	C7H7NO2	Trigonelline	Alkaloids	Alkaloids	311430	217810	201540	140020	146740	76553	403770	292940	575470	432450	279460	231600
mws1013	6	C9H6O4	Esculetin	Lignans and Coumarins	Coumarins	22362	43693	21816	36851	27578	24590	66914	69476	81466	50034	57926	84582
pmb2795	6	C10H10O3	4-Methoxycinnamic acid*	Phenolic acids	Phenolic acids	400360	687970	822970	509480	602720	742810	981520	1386500	1677800	1253100	753130	833820
mws1195	6	C10H10O3	Methyl p-coumarate*	Phenolic acids	Phenolic acids	502560	865110	1042700	679140	750470	1002300	1370600	1848500	1952200	1706300	1038100	1121200
Zmgn000447	6	C3H7O7P	3-Phospho-D-glyceric acid	Others	Saccharides and Alcohols	1720200	2515000	4195000	2332000	3821900	5108400	10631000	10033000	6206300	11330000	6946600	4349900
pme0422	6	C10H10O4	Isoferulic Acid*	Phenolic acids	Phenolic acids	5947500	7168100	6578500	3558800	2790100	2127300	17979000	14228000	16296000	12008000	9521000	10910000
mws0014	6	C10H10O4	Ferulic acid*	Phenolic acids	Phenolic acids	5161400	6605000	5609900	3458000	2574900	2023600	16569000	13328000	15888000	11353000	8765500	10651000
pmb0490	6	C13H18N2O2	p-Coumaroylputrescine	Alkaloids	Phenolamine	591020	477430	636660	178270	243920	650570	3526500	2265100	3138100	3219000	2040900	2156900
pmn001669	6	C12H14O5	Methyl sinapate	Phenolic acids	Phenolic acids	3424.5	5723.6	10348	5522.9	9311.8	9164.7	27445	48424	22463	29394	33432	19799
Lmhp002153	6	C13H18N2O3	N-p-Coumaroylhydroxyputrescine	Alkaloids	Phenolamine	416180	284130	559700	166650	319630	547300	777200	767740	1059000	818470	917390	930150
pme3961	6	C10H13N5O3	Deoxyadenosine*	Nucleotides and derivatives	Nucleotides and derivatives	9553500	6845000	6129900	5006700	3228400	2930600	12081000	12026000	14612000	8359600	13836000	12219000
mws1715	6	C10H13N5O3	Cordycepin*	Nucleotides and derivatives	Nucleotides and derivatives	112430	79631	80286	58804	48809	46972	142000	128770	167350	103550	173950	164170
pme0376	6	C15H12O5	Naringenin	Flavonoids	Dihydroflavone	9	9	32453	9	23675	37416	52720	27275	66760	38902	7666.2	49545
Lmhn002051	6	C12H12O8	Vnilloylmalic acid	Phenolic acids	Phenolic acids	9233.4	4117.3	4531.4	12177	7986.7	10576	14943	11904	23656	17201	11769	16479
pmn001491	6	C15H24O5	Dendrobiumane D	Others	Others	159690	127630	160040	89098	63967	73444	377930	219200	338970	221140	159560	200810
pmb0494	6	C15H22N2O4	Sinapoylputrescine	Alkaloids	Phenolamine	548590	540080	529200	176770	159770	231610	1112200	928890	1376300	749560	775870	1188100
pmp001214	6	C16H24NO5+	Sinapine	Alkaloids	Alkaloids	36996	40474	37205	8955.2	9206.6	15928	96622	94854	89008	54632	58505	41871
pme3967	6	C12H17N5O5	2-(Dimethylamino)guanosine	Nucleotides and derivatives	Nucleotides and derivatives	1127800	805280	826780	1094700	475070	444170	1465100	1271800	1920200	1054300	1191400	1395800
Lmbn005287	6	C18H32O4	7S,8S-DiHODE; (9Z,12Z)-(7S,8S)-Dihydroxyoctadeca-9,12-dienoic acid	Lipids	Free fatty acids	15506	11808	11581	25435	15113	12844	46213	63716	40620	33644	55315	38973
mws1433	6	C18H19NO4	Feruloyltyramine	Alkaloids	Phenolamine	1301000	1555200	1494100	1043700	1113600	734630	3111600	2068100	2349500	1857800	1373700	2629000
mws0983	6	C20H39NO2	N-Oleoylethanolamine	Others	Others	726020	740200	1117300	641970	731400	831650	2137600	2139100	1555400	1589700	1486100	1414700
Lmbn003970	6	C18H34O5	9,12,13-TriHOME; 9(S),12(S),13(S)-Trihydroxy-10(E)-octadecenoic acid	Lipids	Free fatty acids	5379900	5740900	4070100	4128500	2901800	3314800	8828800	7904700	11238000	7019200	6514300	6136400
pmb0776	6	C20H20N2O3	N-Feruloyl tryptamine	Alkaloids	Phenolamine	10422	14053	31253	8768.7	5810.4	20402	75737	43934	61261	66331	23195	51082
pmf0557	6	C16H11N2NaO4S	Shikonin	Alkaloids	Alkaloids	777220	751890	694070	498750	362220	362350	1815400	1510600	2297800	1322600	1309900	1066000
pmb1562	6	C21H34O4	MAG(18:4)isomer3	Lipids	Glycerol ester	619770	543290	546860	685060	350720	483790	1068200	925600	1170000	907300	880970	628440
pma0104	6	C20H16O7	N-Sinapoylhydroxycoumarin	Lignans and Coumarins	Coumarins	352640	276990	317670	314970	234690	243080	605600	486490	791490	450390	611900	549670
XMP5284	6	C19H32O7	Blumenol C glucoside	Others	Others	7038	9183.8	6167.7	16324	10859	4922	75228	34787	119130	33679	55364	56933
pmb0489	6	C19H28N2O7	N-Glucosyl-p-coumaroyl putrescine	Alkaloids	Phenolamine	371170	326140	577740	152400	159850	409630	2691300	1901800	2619100	1928500	1108400	923520
pmb0500	6	C23H26N2O5	N-p-Coumaroyl-N'-feruloylputrescine	Alkaloids	Phenolamine	4266	11540	7287.1	9	9	9	39810	14711	24127	32722	20015	30617
HJAP012	6	C20H18O10	Luteolin-C-pentoside	Flavonoids	Flavonoid	13423	32030	57987	24536	20656	14822	54685	47281	70602	48138	47193	40758
Lmhp005784	6	C24H28N2O5	p-Coumaroylferuloylcadaverine	Alkaloids	Phenolamine	5393.7	4342.9	6802.6	9	3212.9	2838.1	22362	14040	13011	14630	8317.2	12857
pmb0478	6	C21H26O11	Coumarin O-rutinoside	Phenolic acids	Phenolic acids	13274	16305	14823	13747	10211	9164.1	28411	36510	38453	26645	27022	29390
pmb0492	6	C34H37N3O6	N',N'',N'''-p-Coumaroyl-cinnamoyl-caffeoyl spermidine	Alkaloids	Phenolamine	424630	332980	412690	454640	329450	267060	892340	834050	780860	649540	599780	535110
pmb2936	6	C28H32O14	Disinapoyl glucoside	Phenolic acids	Phenolic acids	2246.7	3645.6	2876.7	2018.1	2072.7	9	20198	10844	19826	12730	20124	13025
pme2292	7	C4H12N2	Putrescine	Alkaloids	Phenolamine	23496000	15951000	24365000	18851000	24616000	27321000	34328000	34115000	37487000	64674000	57727000	48225000
mws4052	7	C4H7NO2	1-Aminocyclopropane-1-carboxylic acid	Others	Others	152240	169120	123260	214040	166680	140780	222270	273970	295260	414340	323340	367730
mws0671	7	C4H9NO3	L-Homoserine	Organic acids	Organic acids	1744500	1764600	1812200	1761100	1336100	1548500	2221500	3020500	3819200	4158900	3178200	2846700
pmp001086	7	C6H6O3	5-Hydroxymethylfurfural	Phenolic acids	Phenolic acids	319290	315340	337830	446230	358270	298880	535120	543570	575000	1000600	931220	985730
pme2693	7	C6H14N2O	N-Acetylputrescine	Alkaloids	Phenolamine	641060	300110	446270	608870	439460	415430	972990	832110	1114300	1494300	1385700	1131300
pmb0501	7	C5H14N4	Agmatine	Alkaloids	Phenolamine	630750	319870	419840	597660	457690	355300	933700	909450	1197600	1557400	1216700	1170100
Zmyn000247	7	C5H8O5	(S)-2-Hydroxyglutaric Acid	Organic acids	Organic acids	85836	80183	99567	127760	109890	87339	191440	169820	187960	270080	217860	194450
pme2914	7	C6H10O5	3-Hydroxy-3-methylpentane-1,5-dioic acid	Amino acids and derivatives	Amino acids and derivatives	1585400	720160	984230	1585800	959970	1628800	2017900	1916200	1782400	3109200	3668100	3502600
pme0253	7	C8H15NO3	N-Acetyl-L-leucine	Amino acids and derivatives	Amino acids and derivatives	55276	66256	48735	32297	34449	40350	81850	75845	75216	78192	66134	115890
mws0154	7	C7H10O5	Shikimic acid	Organic acids	Organic acids	50702	124660	79296	98667	71538	57420	142150	87198	106870	192790	134280	155710
pme0534	7	C6H12O7	Gluconic acid	Others	Saccharides and Alcohols	1143400	714050	1198600	1352300	1205500	1378900	1342500	1196500	2138600	2824400	1953200	2692500
pma3101	7	C11H14NO6+	Nicotinate D-ribonucleoside	Others	Vitamin	2717100	1905700	2128100	2203300	1789700	1317100	2891700	2644700	3225900	5328700	3115600	3687100
mws0362	7	C17H34O2	Margaric Acid	Lipids	Free fatty acids	214050	135310	209150	215810	193080	157930	514500	340050	208320	517910	408610	306410
Lmmn003323	7	C16H32O3	2-Hydroxyhexadecanoic acid	Organic acids	Organic acids	3061600	1768400	2192900	6517300	5865500	7377000	10180000	6880200	9143600	20552000	18061000	20850000
pmn001687	7	C13H12O8	Cis-Coutaric acid	Phenolic acids	Phenolic acids	61308	48234	42969	61542	45248	46164	77870	63066	91508	119050	110160	92462
mws0397	7	C20H30O2	Cis-5,8,11,14,17-Eicosapentaenoic Acid	Lipids	Free fatty acids	49378	71189	70801	42511	66667	46759	75167	103990	114920	109800	178970	150740
pmb0751	7	C16H16O7	Trans-5-O-(4-Coumaroyl)shikimate	Phenolic acids	Phenolic acids	33055	43788	47742	48509	40819	44818	86491	71402	106960	201120	163220	161110
Lmtn002565	7	C14H18O9	1-O-Vanilloyl-β-D-Glucose	Phenolic acids	Phenolic acids	79519	56342	66269	99104	86590	82322	129760	110360	143520	210240	119450	198390
mws0264	7	C12H22O11	D-(+)-Trehalose*	Others	Saccharides and Alcohols	32536	48836	24113	72968	54883	43087	109050	102650	135120	284790	249060	207140
mws1333	7	C12H22O11	Melibiose*	Others	Saccharides and Alcohols	13026	12357	21931	17445	17104	27835	53796	23493	43244	96191	83492	77686
Lmhp011562	7	C21H36O4	1-α-Linolenoyl-glycerol*	Lipids	Glycerol ester	1703900	1441100	1122400	1919600	1059300	1094400	2899200	1944800	2254500	3165800	3548000	3495400
Zmhn002334	7	C16H20O9	6-O-Feruloyl-glucose*	Phenolic acids	Phenolic acids	9	9	9	200010	70181	67912	227960	221680	228460	339300	185560	284940
mws5040	7	C12H21O11Na	Turanose	Others	Saccharides and Alcohols	3441100	3890100	3196100	5258100	4258200	3208600	15237000	8163600	11793000	20019000	17237000	14552000
pmb0964	7	C16H23N5O5	Isopentenyladenine-7-N-glucoside	Nucleotides and derivatives	Nucleotides and derivatives	212290	295980	200990	341990	273980	214910	958330	716350	735550	1259900	1170900	1052200
pma0110	7	C18H22O10	O-Sinapoyl quinic acid	Phenolic acids	Phenolic acids	338150	342400	353690	421580	328250	284420	645370	411810	629780	742610	747650	853990
Hmbn009700	7	C30H48O3	Betulinic acid*	Terpenoids	Triterpene	20316	21289	24145	30778	45805	28444	77384	65823	72263	62167	86060	81035
pme0281	8	C8H6O4	Terephthalic acid*	Phenolic acids	Phenolic acids	3118400	3484600	5363700	3533300	4350200	6014200	2623200	3311300	3874800	1114800	2388500	2734100
mws0214	8	C6H14O6	D-Sorbitol*	Others	Saccharides and Alcohols	10855	3777.2	64693	16175	14254	47277	9431.5	5761.1	4216.9	23707	11005	36470
mws5037	8	C9H18N2O3	Alanylleucine	Amino acids and derivatives	Amino acids and derivatives	333910	240540	410180	213530	459860	410070	262080	379020	355450	123270	130000	170090
pme3313	8	C6H13O9P	D-Fructose 6-phosphate	Others	Saccharides and Alcohols	124480	84607	103030	50501	63884	51338	22129	15889	20716	59902	38531	32884
Zmpn000095	8	C6H15O9P	Sorbitol-6-phosphate	Others	Saccharides and Alcohols	324970	304970	222340	165840	203160	152540	99812	74662	118330	140890	100510	109960
mws0582	8	C11H19N3O6S	S-(Methyl)glutathione	Amino acids and derivatives	Amino acids and derivatives	89448	81425	59241	75560	74145	60035	47002	38736	34195	35236	40379	26150
mws0930	8	C22H34O2	Docosapentaenoic acid	Lipids	Free fatty acids	30493	14130	22306	27328	26084	18359	20474	2824.2	4644.2	16579	3679.9	5589
mws0609	8	C10H12N5O7P	Guanosine 3',5'-cyclic monophosphate	Nucleotides and derivatives	Nucleotides and derivatives	2514200	706320	621290	1108100	310780	343790	316250	291500	349310	909690	1288000	915220
HJAP032	8	C21H36O4	Portulene	Others	Others	13899000	12722000	11384000	10173000	9159800	9594700	2159800	2104100	6824100	4481700	4167200	8297700
pmp001283	8	C21H38O4	Glyceryl linoleate	Lipids	Glycerol ester	1503200	1409500	1056000	1033500	847390	790620	121010	135780	619810	342440	291200	648670
pmb0164	8	C21H38O4	MAG(18:2)isomer1	Lipids	Glycerol ester	84371	112320	116640	88771	71879	81457	50761	38296	56480	57829	40401	87673
pmb0296	8	C21H40O4	MAG(18:1)isomer2*	Lipids	Glycerol ester	9878600	14408000	12493000	7592300	9268200	8353100	395940	500100	3535400	1411300	1171200	2966900
pmb2363	8	C21H40O4	MAG(18:1)isomer1*	Lipids	Glycerol ester	9934500	14776000	13248000	7493300	9516100	8045200	390720	517210	3664900	1501900	1211100	3146600
Lmhp007836	8	C21H38NO7P	LysoPE 16:3	Lipids	LPE	31481	31070	48760	23801	33395	42249	14710	11025	7240.6	13100	8114.3	10014
pmd0160	8	C21H44NO7P	LysoPE 16:0(2n isomer)	Lipids	LPE	12524000	11744000	11478000	9433700	13674000	11964000	4528600	4490400	3937500	12432000	7768800	7760100
Lmhp010162	8	C22H46NO7P	LysoPE 17:0	Lipids	LPE	934680	523390	2612600	632970	697590	1558300	116350	111570	95339	249100	293350	254390
Lmhp008233	8	C23H40NO7P	LysoPE 18:4	Lipids	LPE	77144	30203	48094	68043	53903	38321	9682.1	8269.1	4764.3	13874	6516.2	8753.7
Lmhp008801	8	C23H42NO7P	LysoPE 18:3*	Lipids	LPE	14256000	11976000	7282200	10130000	7944300	6330000	1644400	1235000	3247800	4031100	3895700	6646100
Lmhp008589	8	C23H42NO7P	LysoPE 18:3(2n isomer)*	Lipids	LPE	15955000	12023000	7609700	10491000	9011600	7228100	1944200	1477200	3468400	4304000	4003400	6772000
pmb0874	8	C23H44NO7P	LysoPE 18:2(2n isomer)*	Lipids	LPE	1298900	996060	616690	960510	855550	644840	84865	56137	144790	252250	266660	452280
mws0289	8	C23H46NO7P	LysoPE 18:1*	Lipids	LPE	39364000	30628000	25034000	24802000	39509000	33704000	10904000	9758100	7302200	14091000	19371000	22809000
pmb0856	8	C23H46NO7P	LysoPE 18:1(2n isomer)*	Lipids	LPE	41186000	37713000	30649000	28054000	45839000	41695000	12190000	10993000	9069700	16748000	21327000	25454000
pmb2260	8	C23H46NO7P	LysoPC 15:1	Lipids	LPC	507130	276860	338340	279840	160160	223920	122290	64215	61968	105730	75879	57214
pmb0883	8	C23H48NO7P	LysoPE 18:0	Lipids	LPE	86706	63433	59671	65491	66476	57153	20517	10242	14335	44079	21873	28215
pmb0880	8	C23H48NO7P	LysoPE 18:0(2n isomer)	Lipids	LPE	235960	195080	169410	167680	286390	234480	63071	56487	44336	93843	133680	157600
pmb2319	8	C23H48NO7P	LysoPC 15:0*	Lipids	LPC	1318600	1015500	577850	729640	1382800	813140	164850	281310	314030	421090	431450	756650
pmd0132	8	C24H50NO7P	LysoPC 16:0(2n isomer)	Lipids	LPC	10388000	13595000	5877800	7946000	15137000	8339400	1112000	1461200	2004100	4899200	4858900	6593200
Lmhp009349	8	C25H44NO7P	LysoPE 20:4(2n isomer)*	Lipids	LPE	635310	302450	342400	460860	550850	420290	120530	127540	116200	202890	175890	112650
Lmhp009802	8	C25H46NO7P	LysoPE 20:3(2n isomer)*	Lipids	LPE	742570	167980	332800	408080	371710	367370	26005	23021	29133	54441	45010	39522
Lmhp008718	8	C25H48NO7P	LysoPC 17:2	Lipids	LPC	491700	283860	184570	359580	470980	274570	39822	34481	83460	130870	109060	195870
Lmhp010757	8	C25H48NO7P	LysoPE 20:2	Lipids	LPE	340200	97197	158510	210600	178420	181680	33901	47057	31812	57258	87125	70222
Lmhp010514	8	C25H48NO7P	LysoPE 20:2(2n isomer)	Lipids	LPE	326550	85470	161590	191530	188810	187860	37587	51117	38456	61583	90563	67709
Lmhp009590	8	C25H50NO7P	LysoPC 17:1	Lipids	LPC	28289000	10918000	10264000	17623000	17640000	11606000	4019900	4982000	3795600	6683100	5233300	5173000
Lmhp010515	8	C25H52NO7P	LysoPC 17:0(2n isomer)*	Lipids	LPC	3237900	1344800	726370	1640600	1592200	829340	205340	202410	344000	507700	481460	853130
Lmhp009526	8	C27H46O9	2-γ-Linolenoyl-glycerol-glucoside*	Lipids	Glycerol ester	324720	293370	236970	195370	194030	189040	47002	36218	299210	107190	80124	158070
Hmqp006235	8	C21H46N3O9P	LysoPC 18:4	Lipids	LPC	294370	138680	141270	184160	251070	120800	33676	36094	42852	57102	29400	32078
Lmhp010573	8	C27H48O9	1-Linoleoylglycerol-glucoside*	Lipids	Glycerol ester	148090	146510	115100	129660	74285	80269	8981.2	11129	59855	28649	27748	65541
Lmhp010334	8	C27H48O9	2-Linoleoylglycerol-glucoside*	Lipids	Glycerol ester	159720	157220	121210	130620	85338	87285	10373	13640	51385	34487	35258	72282
pmb0865	8	C26H48NO7P	LysoPC 18:3(2n isomer)	Lipids	LPC	26469000	29077000	14967000	15654000	19024000	12133000	2406400	2032600	7758400	10815000	10476000	17362000
pmp001251	8	C26H50NO7P	LysoPC 18:2(isomer)	Lipids	LPC	6824400	5357000	2848400	3965700	4670500	3086400	230270	193940	878050	1211200	1373200	2720300
Lmhp010190	8	C26H52NO7P	LysoPC 18:1(2n isomer)	Lipids	LPC	46785000	54998000	31998000	30689000	55566000	38759000	7258700	10869000	13321000	15079000	23873000	34653000
pmd0136	8	C26H54NO7P	LysoPC 18:0(2n isomer)	Lipids	LPC	2102200	1914200	859400	1371400	2210200	1174700	102220	122770	351000	572380	492620	1103900
Lmhp010041	8	C27H46NO7P	LysoPE 22:5	Lipids	LPE	550200	108610	247540	434330	211350	268650	49455	6784.3	5285.2	47153	6159.2	6694.3
Lmhp008742	8	C28H48NO7P	LysoPC 20:5	Lipids	LPC	1284900	1513000	1017000	749110	1895600	1059400	398050	630650	494350	797820	991110	827040
Lmhp009890	8	C28H52NO7P	LysoPC 20:3	Lipids	LPC	6123600	2431100	2568200	2757700	3972800	2445600	145090	131420	243260	314980	236130	210140
pmd0147	8	C28H54NO7P	LysoPC 20:2*	Lipids	LPC	1092000	392110	357570	480130	754310	471820	64212	105980	94634	99621	145260	116720
pmd0146	8	C28H54NO7P	LysoPC 20:2(2n isomer)*	Lipids	LPC	1016900	363140	342570	483220	774760	456840	59042	97556	91255	93220	124720	123530
Lmhp011549	8	C28H56NO7P	LysoPC 20:1	Lipids	LPC	937380	539850	236780	534800	569300	268200	97664	86136	66949	151650	218300	213810
Lmhp009368	8	C30H50NO7P	LysoPC 22:6	Lipids	LPC	267610	228210	217630	170210	287220	216310	16820	4096.5	8483.2	17061	6556.2	17116
Lmhp009682	8	C30H52NO7P	LysoPC 22:5(2n isomer)	Lipids	LPC	266670	167230	104590	104340	274040	107510	10407	16007	15073	18664	18289	18324
Lmhp010099	8	C30H52NO7P	LysoPC 22:5	Lipids	LPC	1672000	601460	864710	979700	924090	790890	98164	18927	21907	109880	18706	51969
Lmhp010394	8	C30H54NO7P	LysoPC 22:4	Lipids	LPC	636760	274430	180860	289240	415900	211060	22202	22436	13752	27127	13723	12409
Lmhp008513	8	C33H56O14	2-γ-Linolenoyl-glycerol-diglucoside*	Lipids	Glycerol ester	229830	349720	374320	151750	238130	285200	12926	19014	136730	75745	50577	142640
Lmhp008744	8	C33H56O14	1-α-Linolenoyl-glycerol-diglucoside*	Lipids	Glycerol ester	249770	394760	282180	161540	267860	233810	9775.7	15156	131010	69202	47585	142820
pmp001271	8	C33H58O14	2,3-Dihydroxypropyl-9,12-octadecadienoate-hexose-hexose*	Lipids	Free fatty acids	376370	685710	754580	363300	497570	456710	10055	17404	156500	88419	82794	303400
Lmhp009384	8	C33H58O14	1-Linoleoylglycerol-diglucoside*	Lipids	Glycerol ester	524770	703930	595020	442280	498200	502450	14421	20088	157890	108930	92699	190760
Lmmn004145	8	C38H60O10	3-O-(2-O-Acetyl-glucosyl)oleanolic acid	Terpenoids	Triterpene	9642000	16884000	12719000	8755300	9184500	10663000	306240	430300	4417600	2338900	1772000	5495700
pmn001505	8	C41H64O13	Oleanolic acid-3-O-xylose(1→3)-glucuronide	Terpenoids	Triterpene Saponin	36206	67463	50159	34857	56764	47829	9417.3	9	15518	11322	13122	33707
pma0134	9	C4H8O4	D-(-)-Threose	Others	Saccharides and Alcohols	90199	97695	99147	231590	195620	147310	177720	138140	176770	288520	258970	264710
Lmbp000728	9	C8H8O	(S)-2-Phenyloxirane	Others	Others	4786700	5551900	6027100	11553000	8504400	7690900	9458600	6127400	9871400	11831000	13393000	12907000
pme0057	9	C4H9NO2S	L-Homocysteine	Amino acids and derivatives	Amino acids and derivatives	24804	18515	15802	53237	51756	33573	23028	26634	33444	36852	45350	57168
mws1336	9	C7H7NO2	4-Aminobenzoic acid	Phenolic acids	Phenolic acids	29790	57231	74536	99798	50423	39710	35119	20877	36493	146050	110140	83237
pme1002	9	C8H11NO	L-Tyramine*	Amino acids and derivatives	Amino acids and derivatives	3867300	4200500	4890300	9377900	7699300	5947700	7939300	5697900	8047300	11320000	10758000	11959000
pma0948	9	C8H11NO	Phenylethanolamine*	Others	Others	1535000	1719200	1824000	3462000	2718200	2161600	2903200	2009700	2850100	4132500	3569700	4273800
pme1691	9	C7H16NO2	Acetylcholine	Alkaloids	Alkaloids	58373	103450	107530	178670	199880	229540	142550	107870	131830	257600	219100	275690
mws1024	9	C9H8O2	p-Coumaraldehyde	Phenolic acids	Phenolic acids	10585	23912	17076	30476	32668	26962	11706	17287	15359	42473	39400	61259
mws0344	9	C5H10O6	D-Xylonic acid	Organic acids	Organic acids	1380800	1064300	1160700	1522600	1663300	1789800	1015700	1017400	1439200	2969400	2641500	2736000
pme0137	9	C7H12N2O4	N-α-Acetyl-L-glutamine	Amino acids and derivatives	Amino acids and derivatives	102640	65661	74734	238980	130470	98101	70137	101850	68997	240270	310060	224550
mws0281	9	C6H8O7	Citric Acid	Organic acids	Organic acids	2024300	1351000	900730	3886000	2392900	1773300	510830	407800	1579600	3302900	2030800	2782500
Zmgn002106	9	C11H13NO3	N-Acetyl-L-phenylalanine	Others	Others	214450	170550	197030	324690	263900	335130	240210	161010	215680	735330	469450	462140
mws0853	9	C11H14O4	Sinapyl alcohol	Phenolic acids	Phenolic acids	70181	107560	71892	130060	111720	91866	66525	63190	49172	78561	104000	187050
mws1337	9	C9H17NO5	D-Pantothenic Acid	Others	Vitamin	3159000	1949300	2217100	6675600	6237000	5068200	2702600	2163000	1973900	5749400	5936500	6163600
pmn001320	9	C12H14O5	1-O-p-Cumaroylglycerol	Phenolic acids	Phenolic acids	96544	105430	111430	821990	765710	657270	74334	71850	71024	1040200	1119600	1071700
pmb2591	9	C13H14N2O3	Acetyltryptophan	Amino acids and derivatives	Amino acids and derivatives	55278	30312	51326	498680	453110	325560	37714	28026	38246	809300	699110	843420
pmp000087	9	C13H16O6	2-Feruloyl-sn-glycerol	Phenolic acids	Phenolic acids	60246	62295	64186	105450	126460	113020	68527	47365	50377	221760	182740	187410
pmn001419	9	C15H18O8	1-O-[(E)-p-Cumaroyl]-glucose	Phenolic acids	Phenolic acids	141540	98219	130670	274170	223170	135860	237100	158030	198210	377630	301620	269550
pmc0066	9	C10H13N4O7P	2'-Deoxyinosine-5'-monophosphate	Nucleotides and derivatives	Nucleotides and derivatives	9	5139.1	20408	39339	40823	125830	30977	24605	38122	58397	80319	103110
Cmhp005227	9	C16H18O8	4,8-Dihydroxy Naphthol-1-O-glucoside	Quinones	Quinones	56627	87391	75746	446970	346110	279420	166020	105610	160310	556630	401950	449240
Hmmp002150	9	C19H19NO5	3,5-Bis(3-methoxy-4-hydroxyphenyl)-2,3-dihydro-2(1H)-pyridinone	Alkaloids	Alkaloids	8570.8	22014	12390	42282	28206	28019	22158	15270	21121	66368	47477	55335
Zmhn002422	9	C16H20O9	Feruloyl glucose	Phenolic acids	Phenolic acids	96968	91458	165900	354520	253150	249590	188430	140270	154300	368980	418630	289230
pmb0064	9	C15H19NO10	DIMBOA glucoside	Alkaloids	Alkaloids	11076000	11557000	11357000	24440000	28269000	24628000	10855000	10617000	10640000	23904000	31236000	30803000
pmp000695	9	C16H22O10	Swertiamarin	Terpenoids	Sesquiterpenoids	22769	29972	34873	60179	42678	42376	47364	42942	42649	68602	85010	60889
pmb3062	9	C17H22O10	Eudesmoyl quinic acid	Phenolic acids	Phenolic acids	120680	75623	87022	457700	516720	386220	91419	66709	87471	314050	491250	533510
pmp001033	9	C19H18O11	Isomangiferin	Others	Xanthone	714800	476580	510490	1944000	1542500	1294300	904440	656030	707080	3352600	2465100	2457300
mad2085	9	C22H18O11	Caffeoyl-p-coumaroyltartaric acid	Phenolic acids	Phenolic acids	22762	16356	9850.5	41054	30942	15204	10244	8914.2	11567	25289	31997	26373
pmb3012	9	C22H22O11	Chrysoeriol-7-O-glucoside	Flavonoids	Flavonoid	33364	31165	27052	56483	42836	51184	36836	23753	28580	69868	66220	74191
pmn001468	9	C19H26O13	Sibiricose A3	Phenolic acids	Phenolic acids	22569	19424	9	240270	194870	130110	58523	49728	41310	363780	268350	319560
pmp001309	9	C21H20O12	6-Hydroxykaempferol-7-O-glucoside	Flavonoids	Flavonols	9	9	9	59316	84094	56657	9	9	9	88146	88685	75240
pmb3042	9	C23H24O12	Tricin-5-O-Glucoside	Flavonoids	Flavonoid	72953	79742	97880	126600	118800	109140	66731	45075	54864	145530	195650	175730
Hmbn002692	9	C22H30O14	6'-O-Feruloylsucrose	Phenolic acids	Phenolic acids	108020	101560	9	844530	444340	369850	479260	355800	376210	1566100	1021200	1268500
pmb3041	9	C23H22O14	Tricin-O-saccharic acid	Flavonoids	Flavonoid	381340	559350	516930	1204100	1179000	1184100	422250	293010	377600	2098700	2023800	1672600
pmn001375	9	C26H32O12	1-Hydroxyterpinin monoglucoside	Lignans and Coumarins	Lignans	70104	60716	63230	234340	180640	164040	53451	49493	55674	272190	275660	262600
pmn001672	9	C23H32O15	Furanofructosyl-α-D-(3-mustard acyl)glucoside	Phenolic acids	Phenolic acids	9	9	9	942300	669850	502130	98538	123170	127000	843430	1056400	1117400
pmn001671	9	C23H32O15	Furanofructosyl-α-D-(6-mustard acyl)glucoside	Phenolic acids	Phenolic acids	9	9	9	837950	674210	523740	145410	72407	65020	910540	1049800	1191800
Rfmb26203	9	C28H36O13	Syringaresinol-Glucoside	Lignans and Coumarins	Lignans	51686	43244	48045	181430	123150	116540	69035	42110	49799	283140	299960	281920
mws1661	9	C28H32O15	Diosmin	Flavonoids	Flavonoid	4270.3	2295.3	9	210570	272880	215300	23845	5469	9	181120	260080	274610
Rfmb26201	9	C30H38O14	Syringaresinol-acetylGlucoside	Lignans and Coumarins	Lignans	22640	12767	15232	40268	29945	25316	16208	11065	13453	41781	42280	33666
Hmgp003086	9	C29H34O16	Tricin-O-rutinoside	Flavonoids	Flavonoid	74294	43248	34143	421700	443680	293000	51542	45701	40401	202510	418380	387700
Lmgp004573	9	C29H34O16	5,7,4'-trihydroxy-6,8-dimethoxy isoflavone-7-O-galactoside-glucose	Flavonoids	Isoflavones	67910	40510	38684	417840	430830	285920	49370	37155	37230	198270	448040	391880
pmp001082	9	C30H34O17	Sudachiin C	Flavonoids	Flavonoid	2513.1	5248.1	5512.2	49929	40481	37061	10889	8898	8550	70741	57901	75961
pmb2819	9	C27H38O19	O-Caffeoyl maltotriose	Phenolic acids	Phenolic acids	9	9	9	108610	66013	48707	9	9	9	246390	166710	116770
pmn001370	9	C32H42O16	Pinoresinol diglucoside	Lignans and Coumarins	Lignans	118030	148450	133040	177180	139880	165850	118890	62311	109630	202280	231110	187490

## Sheet: Table S6
Table S6. KEGG enrichment statistics of Al-resistant varieties Nip
Pathway	ko_ID	Unique compound	compound	Uni_all	compound_all	Index	kpd-ID
Propanoate metabolism	ko00640	1	4	32	232	pme2049	C05984
Fatty acid biosynthesis	ko00061	1	6	32	232	pme1975	C00383
Pyrimidine metabolism	ko00240	4	15	32	232	pme3188;mws0251;pme3174;pme1975	C00105+C00178+C00055+C00383
beta-Alanine metabolism	ko00410	1	7	32	232	pme1975	C00383
Metabolic pathways	ko01100	27	182	32	232	pme3313;pme1975;pmb1096;pmb0981;mws0005;mws0609;pme3174;pmb0496;Zmyn000247;mws1333;mws0251;Zmgn000447;mws0264;pmb0490;Zmpn000095;Rfmb319;pme2693;pme3188;pmb0501;pme0376;Lmlp003161;pme2117;pmb0751;MA10078408;mws0014;mws1080;pme0519	C00085+C00383+C00463+C00020+C00398+C00942+C00055+C18325+C03196+C05402+C00178+C00197+C01083+C18326+C01096+C00408+C02714+C00105+C00179+C00509+C10497+C00008+C02947+C00437+C01494+C01235+C00089
Fatty acid metabolism	ko01212	1	2	32	232	pme1975	C00383
Tryptophan metabolism	ko00380	2	12	32	232	mws0005;pmb1096	C00398+C00463
Phenylalanine, tyrosine and tryptophan biosynthesis	ko00400	1	10	32	232	pmb1096	C00463
Benzoxazinoid biosynthesis	ko00402	1	2	32	232	pmb1096	C00463
Biosynthesis of secondary metabolites	ko01110	14	88	32	232	mws0005;pme0376;Lmbn003524;Rfmb319;pmb0981;pmb1096;pme3313;pme0519;mws0264;Zmgn000447;mws0014;pme2117;pmb0751;MA10078408	C00398+C00509+C16322+C00408+C00020+C00463+C00085+C00089+C01083+C00197+C01494+C00008+C02947+C00437
Lysine degradation	ko00310	2	9	32	232	Zmyn000247;Rfmb319	C03196+C00408
Tropane, piperidine and pyridine alkaloid biosynthesis	ko00960	1	7	32	232	Rfmb319	C00408
Arginine and proline metabolism	ko00330	5	16	32	232	pme2693;pmb0496;pmb0501;Lmlp003161;pmb0490	C02714+C18325+C00179+C10497+C18326
Indole alkaloid biosynthesis	ko00901	1	3	32	232	mws0005	C00398
alpha-Linolenic acid metabolism	ko00592	1	6	32	232	Lmbn003524	C16322
Arginine biosynthesis	ko00220	1	9	32	232	MA10078408	C00437
2-Oxocarboxylic acid metabolism	ko01210	1	20	32	232	MA10078408	C00437
Biosynthesis of amino acids	ko01230	2	36	32	232	Zmgn000447;MA10078408	C00197+C00437
Glycolysis / Gluconeogenesis	ko00010	1	4	32	232	Zmgn000447	C00197
Pentose phosphate pathway	ko00030	1	5	32	232	Zmgn000447	C00197
Glycine, serine and threonine metabolism	ko00260	1	10	32	232	Zmgn000447	C00197
Cysteine and methionine metabolism	ko00270	1	12	32	232	Zmgn000447	C00197
Glycerolipid metabolism	ko00561	1	2	32	232	Zmgn000447	C00197
Glyoxylate and dicarboxylate metabolism	ko00630	1	7	32	232	Zmgn000447	C00197
Carbon fixation in photosynthetic organisms	ko00710	2	7	32	232	Zmgn000447;pme3313	C00197+C00085
Carbon metabolism	ko01200	2	15	32	232	pme3313;Zmgn000447	C00085+C00197
Phenylpropanoid biosynthesis	ko00940	4	17	32	232	mws0014;HJN003;pmb0751;pmp001214	C01494+C01175+C02947+C00933
Galactose metabolism	ko00052	4	8	32	232	mws1333;pme0519;pme3313;mws1080	C05402+C00089+C00085+C01235
Starch and sucrose metabolism	ko00500	3	5	32	232	pme3313;mws0264;pme0519	C00085+C01083+C00089
Fructose and mannose metabolism	ko00051	1	3	32	232	Zmpn000095	C01096
Flavonoid biosynthesis	ko00941	2	6	32	232	pmb0751;pme0376	C02947+C00509
Isoflavonoid biosynthesis	ko00943	1	1	32	232	pme0376	C00509
Linoleic acid metabolism	ko00591	1	15	32	232	Lmbn005287	C07354
Stilbenoid, diarylheptanoid and gingerol biosynthesis	ko00945	1	3	32	232	pmb0751	C02947
ABC transporters	ko02010	3	34	32	232	mws0264;pme0519;mws1333	C01083+C00089+C05402
Purine metabolism	ko00230	3	16	32	232	pmb0981;mws0609;pme2117	C00020+C00942+C00008
Zeatin biosynthesis	ko00908	2	6	32	232	pmb0981;pme2117	C00020+C00008
Oxidative phosphorylation	ko00190	1	3	32	232	pme2117	C00008
Photosynthesis	ko00195	1	1	32	232	pme2117	C00008

## Sheet: Table S7
Table S7. Statistical analysis on KEGG differential enrichment classification of Al-resistant varieties Nip
Kegg_pathway	ko_id	Cluter_frequency	Metabolome_frequency	P-value	Corrected_P-value	Pathway
Galactose metabolism	ko00052	4 out of 32 12.5%	8 out of 232 3.44827586206897%	0.0141620271899883	0.552319060409542	https:\\www.genome.jp\dbget-bin\www_bget?map00052
Starch and sucrose metabolism	ko00500	3 out of 32 9.375%	5 out of 232 2.1551724137931%	0.0197827999353575	0.771529197478942	https:\\www.genome.jp\dbget-bin\www_bget?map00500
Arginine and proline metabolism	ko00330	5 out of 32 15.625%	16 out of 232 6.89655172413793%	0.0519563386119573	1	https:\\www.genome.jp\dbget-bin\www_bget?map00330
Pyrimidine metabolism	ko00240	4 out of 32 12.5%	15 out of 232 6.46551724137931%	0.13501438085373	1	https:\\www.genome.jp\dbget-bin\www_bget?map00240
Photosynthesis	ko00195	1 out of 32 3.125%	1 out of 232 0.431034482758621%	0.137931034482759	1	https:\\www.genome.jp\dbget-bin\www_bget?map00195
Isoflavonoid biosynthesis	ko00943	1 out of 32 3.125%	1 out of 232 0.431034482758621%	0.137931034482759	1	https:\\www.genome.jp\dbget-bin\www_bget?map00943
Phenylpropanoid biosynthesis	ko00940	4 out of 32 12.5%	17 out of 232 7.32758620689655%	0.192358347339742	1	https:\\www.genome.jp\dbget-bin\www_bget?map00940
Zeatin biosynthesis	ko00908	2 out of 32 6.25%	6 out of 232 2.58620689655172%	0.193958249457087	1	https:\\www.genome.jp\dbget-bin\www_bget?map00908
Flavonoid biosynthesis	ko00941	2 out of 32 6.25%	6 out of 232 2.58620689655172%	0.193958249457087	1	https:\\www.genome.jp\dbget-bin\www_bget?map00941
Carbon fixation in photosynthetic organisms	ko00710	2 out of 32 6.25%	7 out of 232 3.01724137931034%	0.248811334216547	1	https:\\www.genome.jp\dbget-bin\www_bget?map00710
Benzoxazinoid biosynthesis	ko00402	1 out of 32 3.125%	2 out of 232 0.862068965517241%	0.257351843558741	1	https:\\www.genome.jp\dbget-bin\www_bget?map00402
Fatty acid metabolism	ko01212	1 out of 32 3.125%	2 out of 232 0.862068965517241%	0.257351843558741	1	https:\\www.genome.jp\dbget-bin\www_bget?map01212
Glycerolipid metabolism	ko00561	1 out of 32 3.125%	2 out of 232 0.862068965517241%	0.257351843558741	1	https:\\www.genome.jp\dbget-bin\www_bget?map00561
Metabolic pathways	ko01100	27 out of 32 84.375%	182 out of 232 78.448275862069%	0.265616172158375	1	https:\\www.genome.jp\dbget-bin\www_bget?map01100
Biosynthesis of secondary metabolites	ko01110	14 out of 32 43.75%	88 out of 232 37.9310344827586%	0.293920440015695	1	https:\\www.genome.jp\dbget-bin\www_bget?map01110
Lysine degradation	ko00310	2 out of 32 6.25%	9 out of 232 3.87931034482759%	0.359170516649252	1	https:\\www.genome.jp\dbget-bin\www_bget?map00310
Indole alkaloid biosynthesis	ko00901	1 out of 32 3.125%	3 out of 232 1.29310344827586%	0.360676804454915	1	https:\\www.genome.jp\dbget-bin\www_bget?map00901
Stilbenoid, diarylheptanoid and gingerol biosynthesis	ko00945	1 out of 32 3.125%	3 out of 232 1.29310344827586%	0.360676804454915	1	https:\\www.genome.jp\dbget-bin\www_bget?map00945
Oxidative phosphorylation	ko00190	1 out of 32 3.125%	3 out of 232 1.29310344827586%	0.360676804454915	1	https:\\www.genome.jp\dbget-bin\www_bget?map00190
Fructose and mannose metabolism	ko00051	1 out of 32 3.125%	3 out of 232 1.29310344827586%	0.360676804454915	1	https:\\www.genome.jp\dbget-bin\www_bget?map00051
Purine metabolism	ko00230	3 out of 32 9.375%	16 out of 232 6.89655172413793%	0.383601005953972	1	https:\\www.genome.jp\dbget-bin\www_bget?map00230
Propanoate metabolism	ko00640	1 out of 32 3.125%	4 out of 232 1.72413793103448%	0.450014543570387	1	https:\\www.genome.jp\dbget-bin\www_bget?map00640
Glycolysis / Gluconeogenesis	ko00010	1 out of 32 3.125%	4 out of 232 1.72413793103448%	0.450014543570387	1	https:\\www.genome.jp\dbget-bin\www_bget?map00010
Tryptophan metabolism	ko00380	2 out of 32 6.25%	12 out of 232 5.17241379310345%	0.512814947690145	1	https:\\www.genome.jp\dbget-bin\www_bget?map00380
Pentose phosphate pathway	ko00030	1 out of 32 3.125%	5 out of 232 2.1551724137931%	0.527205484823665	1	https:\\www.genome.jp\dbget-bin\www_bget?map00030
Fatty acid biosynthesis	ko00061	1 out of 32 3.125%	6 out of 232 2.58620689655172%	0.593854931896982	1	https:\\www.genome.jp\dbget-bin\www_bget?map00061
alpha-Linolenic acid metabolism	ko00592	1 out of 32 3.125%	6 out of 232 2.58620689655172%	0.593854931896982	1	https:\\www.genome.jp\dbget-bin\www_bget?map00592
Carbon metabolism	ko01200	2 out of 32 6.25%	15 out of 232 6.46551724137931%	0.641778595083201	1	https:\\www.genome.jp\dbget-bin\www_bget?map01200
Tropane, piperidine and pyridine alkaloid biosynthesis	ko00960	1 out of 32 3.125%	7 out of 232 3.01724137931034%	0.651362198177058	1	https:\\www.genome.jp\dbget-bin\www_bget?map00960
beta-Alanine metabolism	ko00410	1 out of 32 3.125%	7 out of 232 3.01724137931034%	0.651362198177058	1	https:\\www.genome.jp\dbget-bin\www_bget?map00410
Glyoxylate and dicarboxylate metabolism	ko00630	1 out of 32 3.125%	7 out of 232 3.01724137931034%	0.651362198177058	1	https:\\www.genome.jp\dbget-bin\www_bget?map00630
Arginine biosynthesis	ko00220	1 out of 32 3.125%	9 out of 232 3.87931034482759%	0.743668206659701	1	https:\\www.genome.jp\dbget-bin\www_bget?map00220
Glycine, serine and threonine metabolism	ko00260	1 out of 32 3.125%	10 out of 232 4.31034482758621%	0.780451244269072	1	https:\\www.genome.jp\dbget-bin\www_bget?map00260
Phenylalanine, tyrosine and tryptophan biosynthesis	ko00400	1 out of 32 3.125%	10 out of 232 4.31034482758621%	0.780451244269072	1	https:\\www.genome.jp\dbget-bin\www_bget?map00400
Cysteine and methionine metabolism	ko00270	1 out of 32 3.125%	12 out of 232 5.17241379310345%	0.839305453950153	1	https:\\www.genome.jp\dbget-bin\www_bget?map00270
ABC transporters	ko02010	3 out of 32 9.375%	34 out of 232 14.6551724137931%	0.885827935994489	1	https:\\www.genome.jp\dbget-bin\www_bget?map02010
Linoleic acid metabolism	ko00591	1 out of 32 3.125%	15 out of 232 6.46551724137931%	0.899956184212425	1	https:\\www.genome.jp\dbget-bin\www_bget?map00591
2-Oxocarboxylic acid metabolism	ko01210	1 out of 32 3.125%	20 out of 232 8.62068965517241%	0.95530740930178	1	https:\\www.genome.jp\dbget-bin\www_bget?map01210
Biosynthesis of amino acids	ko01230	2 out of 32 6.25%	36 out of 232 15.5172413793103%	0.976603363788332	1	https:\\www.genome.jp\dbget-bin\www_bget?map01230

## Sheet: Table S8
Table S8. KEGG enrichment statistics of Al-sensitive varieties H570
Pathway	ko_ID	Unique compound	compound	Uni_all	compound_all	Index	kpd-ID
Arginine and proline metabolism	ko00330	7	16	55	233	pme2292;pme2527;pme2693;pmb0490;pmb0501;Lmlp003161;pme0006	C00134+C00077+C02714+C18326+C00179+C10497+C00148
D-Arginine and D-ornithine metabolism	ko00472	2	3	55	233	pme2527;pme2292	C00077+C00134
Glutathione metabolism	ko00480	3	5	55	233	pme0195;pme2527;pme2292	C00097+C00077+C00134
Tropane, piperidine and pyridine alkaloid biosynthesis	ko00960	2	7	55	233	Rfmb319;pme2292	C00408+C00134
Metabolic pathways	ko01100	45	182	55	233	pma3101;Lmlp003161;mws0671;mws0154;pme0230;pme1184;mws0255;pme0282;pmb0490;mws0005;mws4085;pme1210;pme0195;pmb0501;pme3961;mws4052;mws1189;mws0093;mws0264;mws0014;pme2693;mws0884;mws0180;pme2527;pme2292;mws0889;pme0006;mws1333;pme1194;pme0281;pmb0751;mws0001;mws0254;pme0519;pme1474;pmb1096;pme2122;mws0921;pme1654;pme0243;mws0183;Rfmb319;mws1080;Zmyn000247;mws4170	C05841+C10497+C00263+C00493+C00212+C00330+C00380+C01606+C18326+C00398+C00482+C00073+C00097+C00179+C00559+C01234+C00333+C00590+C01083+C01494+C02714+C00575+C00628+C00077+C00134+C01620+C00148+C05402+C00881+C06337+C02947+C00152+C00135+C00089+C00170+C00463+C00388+C02646+C08491+C00489+C00230+C00408+C01235+C03196+C00031
Biosynthesis of secondary metabolites	ko01110	26	88	55	233	pme2292;pme2527;mws0671;pme0006;mws0001;pmb0751;mws0254;mws0639;mws0154;mws0097;pme2122;pme1210;pmb1096;mws4085;mws0921;mws4052;pme0195;pme0519;mws0005;mws0014;mws0264;mws4170;pme1654;mws0093;Rfmb319;mws0183	C00134+C00077+C00263+C00148+C00152+C02947+C00135+C00196+C00493+C05366+C00388+C00073+C00463+C00482+C02646+C01234+C00097+C00089+C00398+C01494+C01083+C00031+C08491+C00590+C00408+C00230
ABC transporters	ko02010	14	34	55	233	pme0519;pme0282;pme0006;mws1189;pme3961;pme2292;pme2527;pme1194;pme0230;mws1333;mws0254;mws4170;mws0264;pme1184	C00089+C01606+C00148+C00333+C00559+C00134+C00077+C00881+C00212+C05402+C00135+C00031+C01083+C00330
Cysteine and methionine metabolism	ko00270	5	12	55	233	pme1210;pme1474;mws0671;mws4052;pme0195	C00073+C00170+C00263+C01234+C00097
Pyrimidine metabolism	ko00240	2	15	55	233	mws0255;pme1194	C00380+C00881
Histidine metabolism	ko00340	2	6	55	233	mws0254;pme2122	C00135+C00388
Carbapenem biosynthesis	ko00332	2	4	55	233	pme0195;pme0006	C00097+C00148
Aminoacyl-tRNA biosynthesis	ko00970	5	17	55	233	pme0195;pme0006;mws0254;pme1210;mws0001	C00097+C00148+C00135+C00073+C00152
Biosynthesis of amino acids	ko01230	8	36	55	233	mws0154;pme1210;pme2527;mws0001;pme0195;mws0254;pme0006;mws0671	C00493+C00073+C00077+C00152+C00097+C00135+C00148+C00263
Tryptophan metabolism	ko00380	2	12	55	233	pmb1096;mws0005	C00463+C00398
Phenylalanine, tyrosine and tryptophan biosynthesis	ko00400	3	10	55	233	mws0154;Lmbn002862;pmb1096	C00493+C00587+C00463
Benzoxazinoid biosynthesis	ko00402	1	2	55	233	pmb1096	C00463
Glycine, serine and threonine metabolism	ko00260	2	10	55	233	pme0195;mws0671	C00097+C00263
Lysine biosynthesis	ko00300	1	6	55	233	mws0671	C00263
Sulfur metabolism	ko00920	2	6	55	233	mws0671;pme0195	C00263+C00097
Penicillin and cephalosporin biosynthesis	ko00311	1	3	55	233	pme0195	C00097
Taurine and hypotaurine metabolism	ko00430	1	3	55	233	pme0195	C00097
Cyanoamino acid metabolism	ko00460	2	8	55	233	mws0001;pme0195	C00152+C00097
Thiamine metabolism	ko00730	1	4	55	233	pme0195	C00097
Pantothenate and CoA biosynthesis	ko00770	1	7	55	233	pme0195	C00097
Carbon metabolism	ko01200	1	15	55	233	pme0195	C00097
Sulfur relay system	ko04122	1	2	55	233	pme0195	C00097
Lysine degradation	ko00310	3	9	55	233	Zmyn000247;pme0243;Rfmb319	C03196+C00489+C00408
Fatty acid degradation	ko00071	1	3	55	233	pme0243	C00489
Alanine, aspartate and glutamate metabolism	ko00250	1	10	55	233	mws0001	C00152
Arginine biosynthesis	ko00220	1	9	55	233	pme2527	C00077
2-Oxocarboxylic acid metabolism	ko01210	2	20	55	233	pme2527;pme1210	C00077+C00073
Ascorbate and aldarate metabolism	ko00053	2	7	55	233	mws0889;mws1189	C01620+C00333
Nicotinate and nicotinamide metabolism	ko00760	2	9	55	233	pma3101;pme2268	C05841+C01004
Glucosinolate biosynthesis	ko00966	1	8	55	233	pme1210	C00073
Phenylpropanoid biosynthesis	ko00940	7	17	55	233	mws0014;pmb0751;HJN003;mws4085;mws0921;mws0093;pmp001214	C01494+C02947+C01175+C00482+C02646+C00590+C00933
Tyrosine metabolism	ko00350	1	7	55	233	mws0180	C00628
beta-Alanine metabolism	ko00410	1	7	55	233	mws0254	C00135
Indole alkaloid biosynthesis	ko00901	2	3	55	233	mws0005;mws4170	C00398+C00031
Glycolysis / Gluconeogenesis	ko00010	1	4	55	233	mws4170	C00031
Pentose phosphate pathway	ko00030	1	5	55	233	mws4170	C00031
Galactose metabolism	ko00052	4	8	55	233	mws4170;pme0519;mws1333;mws1080	C00031+C00089+C05402+C01235
Starch and sucrose metabolism	ko00500	3	5	55	233	mws0264;pme0519;mws4170	C01083+C00089+C00031
Amino sugar and nucleotide sugar metabolism	ko00520	2	7	55	233	mws1189;mws4170	C00333+C00031
AGE-RAGE signaling pathway in diabetic complications	ko04933	1	1	55	233	mws4170	C00031
Biosynthesis of various secondary metabolites - part 2	ko00998	2	8	55	233	mws0097;mws0093	C05366+C00590
Pentose and glucuronate interconversions	ko00040	1	5	55	233	mws1189	C00333
alpha-Linolenic acid metabolism	ko00592	1	6	55	233	pme1654	C08491
Plant hormone signal transduction	ko04075	2	4	55	233	pme2074;pme1654	C18699+C08491
Purine metabolism	ko00230	4	16	55	233	mws0884;pme0230;pme3961;pme1184	C00575+C00212+C00559+C00330
Zeatin biosynthesis	ko00908	1	6	55	233	pme1474	C00170
Biosynthesis of unsaturated fatty acids	ko01040	2	11	55	233	mws0930;mws0397	C16513+C06428
Linoleic acid metabolism	ko00591	1	15	55	233	Lmbn005287	C07354
Flavonoid biosynthesis	ko00941	1	7	55	233	pmb0751	C02947
Stilbenoid, diarylheptanoid and gingerol biosynthesis	ko00945	1	3	55	233	pmb0751	C02947

## Sheet: Table S9
Table S9. Statistical analysis on KEGG differential enrichment classification of Al-sensitive varieties H570
Kegg_pathway	ko_id	Cluter_frequency	Metabolome_frequency	P-value	Corrected_P-value	Pathway
ABC transporters	ko02010	14 out of 55 25.4545454545455%	34 out of 233 14.5922746781116%	0.0107012101737631	0.577865349383209	https:\\www.genome.jp\dbget-bin\www_bget?map02010
Arginine and proline metabolism	ko00330	7 out of 55 12.7272727272727%	16 out of 233 6.86695278969957%	0.0541597820014303	1	https:\\www.genome.jp\dbget-bin\www_bget?map00330
Biosynthesis of secondary metabolites	ko01110	26 out of 55 47.2727272727273%	88 out of 233 37.7682403433476%	0.0671001567433864	1	https:\\www.genome.jp\dbget-bin\www_bget?map01110
Phenylpropanoid biosynthesis	ko00940	7 out of 55 12.7272727272727%	17 out of 233 7.29613733905579%	0.075069274359036	1	https:\\www.genome.jp\dbget-bin\www_bget?map00940
Starch and sucrose metabolism	ko00500	3 out of 55 5.45454545454545%	5 out of 233 2.14592274678112%	0.0871174095976598	1	https:\\www.genome.jp\dbget-bin\www_bget?map00500
Glutathione metabolism	ko00480	3 out of 55 5.45454545454545%	5 out of 233 2.14592274678112%	0.0871174095976598	1	https:\\www.genome.jp\dbget-bin\www_bget?map00480
Galactose metabolism	ko00052	4 out of 55 7.27272727272727%	8 out of 233 3.43347639484979%	0.0917148842616549	1	https:\\www.genome.jp\dbget-bin\www_bget?map00052
Cysteine and methionine metabolism	ko00270	5 out of 55 9.09090909090909%	12 out of 233 5.15021459227468%	0.124403876936451	1	https:\\www.genome.jp\dbget-bin\www_bget?map00270
D-Arginine and D-ornithine metabolism	ko00472	2 out of 55 3.63636363636364%	3 out of 233 1.28755364806867%	0.139617116640944	1	https:\\www.genome.jp\dbget-bin\www_bget?map00472
Indole alkaloid biosynthesis	ko00901	2 out of 55 3.63636363636364%	3 out of 233 1.28755364806867%	0.139617116640944	1	https:\\www.genome.jp\dbget-bin\www_bget?map00901
AGE-RAGE signaling pathway in diabetic complications	ko04933	1 out of 55 1.81818181818182%	1 out of 233 0.429184549356223%	0.236051502145923	1	https:\\www.genome.jp\dbget-bin\www_bget?map04933
Plant hormone signal transduction	ko04075	2 out of 55 3.63636363636364%	4 out of 233 1.71673819742489%	0.237360473656489	1	https:\\www.genome.jp\dbget-bin\www_bget?map04075
Carbapenem biosynthesis	ko00332	2 out of 55 3.63636363636364%	4 out of 233 1.71673819742489%	0.237360473656489	1	https:\\www.genome.jp\dbget-bin\www_bget?map00332
Metabolic pathways	ko01100	45 out of 55 81.8181818181818%	182 out of 233 78.1115879828326%	0.287512235197088	1	https:\\www.genome.jp\dbget-bin\www_bget?map01100
Lysine degradation	ko00310	3 out of 55 5.45454545454545%	9 out of 233 3.86266094420601%	0.359570505384575	1	https:\\www.genome.jp\dbget-bin\www_bget?map00310
Aminoacyl-tRNA biosynthesis	ko00970	5 out of 55 9.09090909090909%	17 out of 233 7.29613733905579%	0.370886996368016	1	https:\\www.genome.jp\dbget-bin\www_bget?map00970
Benzoxazinoid biosynthesis	ko00402	1 out of 55 1.81818181818182%	2 out of 233 0.858369098712446%	0.417159982240639	1	https:\\www.genome.jp\dbget-bin\www_bget?map00402
Sulfur relay system	ko04122	1 out of 55 1.81818181818182%	2 out of 233 0.858369098712446%	0.417159982240639	1	https:\\www.genome.jp\dbget-bin\www_bget?map04122
Phenylalanine, tyrosine and tryptophan biosynthesis	ko00400	3 out of 55 5.45454545454545%	10 out of 233 4.29184549356223%	0.433002228489534	1	https:\\www.genome.jp\dbget-bin\www_bget?map00400
Sulfur metabolism	ko00920	2 out of 55 3.63636363636364%	6 out of 233 2.57510729613734%	0.433620967423395	1	https:\\www.genome.jp\dbget-bin\www_bget?map00920
Histidine metabolism	ko00340	2 out of 55 3.63636363636364%	6 out of 233 2.57510729613734%	0.433620967423395	1	https:\\www.genome.jp\dbget-bin\www_bget?map00340
Ascorbate and aldarate metabolism	ko00053	2 out of 55 3.63636363636364%	7 out of 233 3.00429184549356%	0.522014608751769	1	https:\\www.genome.jp\dbget-bin\www_bget?map00053
Amino sugar and nucleotide sugar metabolism	ko00520	2 out of 55 3.63636363636364%	7 out of 233 3.00429184549356%	0.522014608751769	1	https:\\www.genome.jp\dbget-bin\www_bget?map00520
Tropane, piperidine and pyridine alkaloid biosynthesis	ko00960	2 out of 55 3.63636363636364%	7 out of 233 3.00429184549356%	0.522014608751769	1	https:\\www.genome.jp\dbget-bin\www_bget?map00960
Purine metabolism	ko00230	4 out of 55 7.27272727272727%	16 out of 233 6.86695278969957%	0.548015475248939	1	https:\\www.genome.jp\dbget-bin\www_bget?map00230
Taurine and hypotaurine metabolism	ko00430	1 out of 55 1.81818181818182%	3 out of 233 1.28755364806867%	0.555931415040487	1	https:\\www.genome.jp\dbget-bin\www_bget?map00430
Fatty acid degradation	ko00071	1 out of 55 1.81818181818182%	3 out of 233 1.28755364806867%	0.555931415040487	1	https:\\www.genome.jp\dbget-bin\www_bget?map00071
Stilbenoid, diarylheptanoid and gingerol biosynthesis	ko00945	1 out of 55 1.81818181818182%	3 out of 233 1.28755364806867%	0.555931415040487	1	https:\\www.genome.jp\dbget-bin\www_bget?map00945
Penicillin and cephalosporin biosynthesis	ko00311	1 out of 55 1.81818181818182%	3 out of 233 1.28755364806867%	0.555931415040487	1	https:\\www.genome.jp\dbget-bin\www_bget?map00311
Biosynthesis of various secondary metabolites - part 2	ko00998	2 out of 55 3.63636363636364%	8 out of 233 3.43347639484979%	0.600956127666712	1	https:\\www.genome.jp\dbget-bin\www_bget?map00998
Cyanoamino acid metabolism	ko00460	2 out of 55 3.63636363636364%	8 out of 233 3.43347639484979%	0.600956127666712	1	https:\\www.genome.jp\dbget-bin\www_bget?map00460
Biosynthesis of amino acids	ko01230	8 out of 55 14.5454545454545%	36 out of 233 15.450643776824%	0.656555784310327	1	https:\\www.genome.jp\dbget-bin\www_bget?map01230
Glycolysis / Gluconeogenesis	ko00010	1 out of 55 1.81818181818182%	4 out of 233 1.71673819742489%	0.662121728835154	1	https:\\www.genome.jp\dbget-bin\www_bget?map00010
Thiamine metabolism	ko00730	1 out of 55 1.81818181818182%	4 out of 233 1.71673819742489%	0.662121728835154	1	https:\\www.genome.jp\dbget-bin\www_bget?map00730
Nicotinate and nicotinamide metabolism	ko00760	2 out of 55 3.63636363636364%	9 out of 233 3.86266094420601%	0.669923448318748	1	https:\\www.genome.jp\dbget-bin\www_bget?map00760
Glycine, serine and threonine metabolism	ko00260	2 out of 55 3.63636363636364%	10 out of 233 4.29184549356223%	0.72915375327605	1	https:\\www.genome.jp\dbget-bin\www_bget?map00260
Pentose and glucuronate interconversions	ko00040	1 out of 55 1.81818181818182%	5 out of 233 2.14592274678112%	0.743271531953348	1	https:\\www.genome.jp\dbget-bin\www_bget?map00040
Pentose phosphate pathway	ko00030	1 out of 55 1.81818181818182%	5 out of 233 2.14592274678112%	0.743271531953348	1	https:\\www.genome.jp\dbget-bin\www_bget?map00030
Biosynthesis of unsaturated fatty acids	ko01040	2 out of 55 3.63636363636364%	11 out of 233 4.72103004291846%	0.779323916917016	1	https:\\www.genome.jp\dbget-bin\www_bget?map01040
alpha-Linolenic acid metabolism	ko00592	1 out of 55 1.81818181818182%	6 out of 233 2.57510729613734%	0.805201644859339	1	https:\\www.genome.jp\dbget-bin\www_bget?map00592
Lysine biosynthesis	ko00300	1 out of 55 1.81818181818182%	6 out of 233 2.57510729613734%	0.805201644859339	1	https:\\www.genome.jp\dbget-bin\www_bget?map00300
Zeatin biosynthesis	ko00908	1 out of 55 1.81818181818182%	6 out of 233 2.57510729613734%	0.805201644859339	1	https:\\www.genome.jp\dbget-bin\www_bget?map00908
Tryptophan metabolism	ko00380	2 out of 55 3.63636363636364%	12 out of 233 5.15021459227468%	0.82133577917312	1	https:\\www.genome.jp\dbget-bin\www_bget?map00380
Flavonoid biosynthesis	ko00941	1 out of 55 1.81818181818182%	7 out of 233 3.00429184549356%	0.8523994842106	1	https:\\www.genome.jp\dbget-bin\www_bget?map00941
Pantothenate and CoA biosynthesis	ko00770	1 out of 55 1.81818181818182%	7 out of 233 3.00429184549356%	0.8523994842106	1	https:\\www.genome.jp\dbget-bin\www_bget?map00770
Tyrosine metabolism	ko00350	1 out of 55 1.81818181818182%	7 out of 233 3.00429184549356%	0.8523994842106	1	https:\\www.genome.jp\dbget-bin\www_bget?map00350
beta-Alanine metabolism	ko00410	1 out of 55 1.81818181818182%	7 out of 233 3.00429184549356%	0.8523994842106	1	https:\\www.genome.jp\dbget-bin\www_bget?map00410
Glucosinolate biosynthesis	ko00966	1 out of 55 1.81818181818182%	8 out of 233 3.43347639484979%	0.88831996371687	1	https:\\www.genome.jp\dbget-bin\www_bget?map00966
Pyrimidine metabolism	ko00240	2 out of 55 3.63636363636364%	15 out of 233 6.43776824034335%	0.908213712163813	1	https:\\www.genome.jp\dbget-bin\www_bget?map00240
Arginine biosynthesis	ko00220	1 out of 55 1.81818181818182%	9 out of 233 3.86266094420601%	0.915619528141635	1	https:\\www.genome.jp\dbget-bin\www_bget?map00220
Alanine, aspartate and glutamate metabolism	ko00250	1 out of 55 1.81818181818182%	10 out of 233 4.29184549356223%	0.936337947571144	1	https:\\www.genome.jp\dbget-bin\www_bget?map00250
2-Oxocarboxylic acid metabolism	ko01210	2 out of 55 3.63636363636364%	20 out of 233 8.58369098712446%	0.97227462951952	1	https:\\www.genome.jp\dbget-bin\www_bget?map01210
Linoleic acid metabolism	ko00591	1 out of 55 1.81818181818182%	15 out of 233 6.43776824034335%	0.984779624666193	1	https:\\www.genome.jp\dbget-bin\www_bget?map00591
Carbon metabolism	ko01200	1 out of 55 1.81818181818182%	15 out of 233 6.43776824034335%	0.984779624666193	1	https:\\www.genome.jp\dbget-bin\www_bget?map01200
